# Supplementary material for: Associations between squalene epoxidase gene polymorphisms and obesity.
Source: PeerJ journal article supplement (doi:10.7717/peerj.19635), 2025-01-01
Supplement: Codebook.docx [file Codebook.docx]

蓝色=偏低数值，粉色=偏高数值：Blue = lower-than-average values; pink = higher-than-average values.

绿色=体重正常组，橙色=肥胖组：Green = Normal weight group; Orange = Obese group.
