# Supplementary material for: Associations between squalene epoxidase gene polymorphisms and obesity.
Source: PeerJ journal article supplement (doi:10.7717/peerj.19635), 2025-01-01
Supplement: IndependentSamplesTest.docx [file IndependentSamplesTest.docx]

| **Independent Samples Test** | | | | | | | | | | |
| --- | --- | --- | --- | --- | --- | --- | --- | --- | --- | --- |
| 1. | | Levene's Test for Homogeneity of Variances | | T-test for Equivalence of Means | | | | | | |
| F | Significance | t | Degrees of freedom | Significance (two-tailed) | Mean Difference | Standard Error Difference | 95% Confidence Interval of the Difference | |
| Lower Bound | Upper Limit |
| Age (years) | Assuming homoscedasticity | .083 | .773 | -.973 | 1043 | .331 | -.090 | .093 | -.272 | .092 |
| Without assuming equal variances |  |  | -.972 | 1037.095 | .331 | -.090 | .093 | -.272 | .092 |
| Height（cm） | Assuming homoscedasticity | 9.447 | .002 | -13.955 | 1043 | .000 | -6.4276 | .4606 | -7.3313 | -5.5238 |
| Without assuming equal variances |  |  | -13.895 | 1001.426 | .000 | -6.4276 | .4626 | -7.3353 | -5.5199 |
| Body weight（kg） | Assuming homoscedasticity | 218.610 | .000 | -50.708 | 1043 | .000 | -21.17001 | .41749 | -21.98924 | -20.35079 |
| Without assuming equal variances |  |  | -49.584 | 637.827 | .000 | -21.17001 | .42695 | -22.00842 | -20.33161 |
| Body Mass Index | Assuming homoscedasticity | 218.610 | .000 | -50.708 | 1043 | .000 | -7.77594640273 | .15334896428 | -8.07685403547 | -7.47503876999 |
| Without assuming equal variances |  |  | -49.584 | 637.827 | .000 | -7.77594640273 | .15682373679 | -8.08389964308 | -7.46799316237 |
| Systolic blood pressure（mmHg） | Assuming homoscedasticity | 1.684 | .195 | -12.449 | 1043 | .000 | -8.406 | .675 | -9.731 | -7.081 |
| Without assuming equal variances |  |  | -12.453 | 1040.498 | .000 | -8.406 | .675 | -9.731 | -7.082 |
| Diastolic pressure (≥90mmHg) | Assuming homoscedasticity | 40.347 | .000 | -11.687 | 1043 | .000 | -6.029 | .516 | -7.042 | -5.017 |
| Without assuming equal variances |  |  | -11.595 | 944.152 | .000 | -6.029 | .520 | -7.050 | -5.009 |
| Hematocrit/Red Blood Cell Volume Ratio（HCT） | Assuming homoscedasticity | 16.868 | .000 | -6.992 | 1043 | .000 | -1.8536 | .2651 | -2.3738 | -1.3334 |
| Without assuming equal variances |  |  | -7.018 | 1037.917 | .000 | -1.8536 | .2641 | -2.3718 | -1.3353 |
| Hemoglobin（HGB, g/L） | Assuming homoscedasticity | 15.105 | .000 | -6.510 | 1043 | .000 | -6.880 | 1.057 | -8.954 | -4.806 |
| Without assuming equal variances |  |  | -6.534 | 1038.485 | .000 | -6.880 | 1.053 | -8.946 | -4.814 |
| Mean corpuscular hemoglobin concentration（MCH, pg） | Assuming homoscedasticity | 9.745 | .002 | -1.109 | 1043 | .268 | -.1428 | .1288 | -.3956 | .1100 |
| Without assuming equal variances |  |  | -1.116 | 1019.023 | .265 | -.1428 | .1280 | -.3941 | .1084 |
| Mean corpuscular hemoglobin concentration（MCHC,g/L） | Assuming homoscedasticity | 2.906 | .089 | -2.817 | 1043 | .005 | -1.855 | .658 | -3.147 | -.563 |
| Without assuming equal variances |  |  | -2.824 | 1042.165 | .005 | -1.855 | .657 | -3.144 | -.566 |
| Mean corpuscular volume（MCV, fl） | Assuming homoscedasticity | 15.321 | .000 | .062 | 1043 | .951 | .0195 | .3137 | -.5961 | .6351 |
| Without assuming equal variances |  |  | .062 | 1019.115 | .950 | .0195 | .3118 | -.5923 | .6312 |
| Uniform bodyMean Platelet Volume (MPV, fl) | Assuming homoscedasticity | 1.202 | .273 | -.322 | 1042 | .748 | -.0191 | .0594 | -.1356 | .0974 |
| Without assuming equal variances |  |  | -.322 | 1041.732 | .748 | -.0191 | .0593 | -.1355 | .0973 |
| Platelet Volume Fraction (PCT, %) | Assuming homoscedasticity | .006 | .939 | -2.691 | 1043 | .007 | -.01023 | .00380 | -.01769 | -.00277 |
| Without assuming equal variances |  |  | -2.696 | 1043.000 | .007 | -.01023 | .00379 | -.01768 | -.00278 |
| Platelet Volume Distribution Width (PDW, CV%) | Assuming homoscedasticity | .622 | .430 | -.408 | 1043 | .683 | -.0530 | .1298 | -.3076 | .2017 |
| Without assuming equal variances |  |  | -.408 | 1041.908 | .683 | -.0530 | .1297 | -.3074 | .2015 |
| Platelet count (PLT) | Assuming homoscedasticity | .004 | .947 | -2.358 | 1043 | .019 | -9.203 | 3.903 | -16.861 | -1.545 |
| Without assuming equal variances |  |  | -2.362 | 1042.956 | .018 | -9.203 | 3.896 | -16.849 | -1.557 |
| Red Blood Cells (RBC) | Assuming homoscedasticity | 4.571 | .033 | -6.862 | 1043 | .000 | -.21195 | .03089 | -.27256 | -.15134 |
| Without assuming equal variances |  |  | -6.874 | 1042.993 | .000 | -.21195 | .03083 | -.27245 | -.15145 |
| Red blood cell distribution width（RDW） | Assuming homoscedasticity | 19.352 | .000 | 2.638 | 1043 | .008 | .1838 | .0697 | .0471 | .3205 |
| Without assuming equal variances |  |  | 2.661 | 986.184 | .008 | .1838 | .0691 | .0483 | .3193 |
| White blood cells (WBC) | Assuming homoscedasticity | 2.297 | .130 | -5.566 | 1043 | .000 | -.53242 | .09565 | -.72010 | -.34473 |
| Without assuming equal variances |  |  | -5.554 | 1025.242 | .000 | -.53242 | .09585 | -.72051 | -.34432 |
| Alanine transaminase (ALT, U/L） | Assuming homoscedasticity | 14.096 | .000 | -5.745 | 1043 | .000 | -5.87821 | 1.02319 | -7.88596 | -3.87046 |
| Without assuming equal variances |  |  | -5.711 | 979.085 | .000 | -5.87821 | 1.02921 | -7.89792 | -3.85851 |
| Glutamic pyruvic transaminase（AST, U/L） | Assuming homoscedasticity | 4.608 | .032 | -2.026 | 1043 | .043 | -1.62424 | .80155 | -3.19708 | -.05140 |
| Without assuming equal variances |  |  | -1.988 | 701.918 | .047 | -1.62424 | .81718 | -3.22865 | -.01983 |
| AST:ALT | Assuming homoscedasticity | .022 | .883 | 9.269 | 1043 | .000 | .21425 | .02311 | .16889 | .25960 |
| Without assuming equal variances |  |  | 9.313 | 1033.068 | .000 | .21425 | .02301 | .16910 | .25939 |
| Blood Urea Nitrogen（BUN, mmol/L） | Assuming homoscedasticity | .385 | .535 | -.315 | 1043 | .753 | -.02199 | .06990 | -.15914 | .11517 |
| Without assuming equal variances |  |  | -.315 | 1042.757 | .753 | -.02199 | .06981 | -.15896 | .11499 |
| Total cholesterol（CHOL, mmol/L） | Assuming homoscedasticity | 4.646 | .031 | -4.158 | 1043 | .000 | -.17526 | .04215 | -.25797 | -.09255 |
| Without assuming equal variances |  |  | -4.137 | 993.315 | .000 | -.17526 | .04236 | -.25839 | -.09214 |
| Creatinine（CREA, μmol/L） | Assuming homoscedasticity | 55.283 | .000 | -4.799 | 1043 | .000 | -3.94327 | .82163 | -5.55551 | -2.33103 |
| Without assuming equal variances |  |  | -4.759 | 933.262 | .000 | -3.94327 | .82864 | -5.56949 | -2.31706 |
| Blood glucose（GLU, mmol/L） | Assuming homoscedasticity | 10.757 | .001 | -1.753 | 1043 | .080 | -.05393 | .03076 | -.11428 | .00642 |
| Without assuming equal variances |  |  | -1.732 | 857.130 | .084 | -.05393 | .03113 | -.11503 | .00718 |
| HDL-C （mmol/L） | Assuming homoscedasticity | 10.823 | .001 | 11.350 | 1043 | .000 | .18205 | .01604 | .15057 | .21352 |
| Without assuming equal variances |  |  | 11.398 | 1035.724 | .000 | .18205 | .01597 | .15071 | .21339 |
| LDL-C (mmol/L) | Assuming homoscedasticity | 8.951 | .003 | -7.991 | 1043 | .000 | -.27565 | .03450 | -.34335 | -.20796 |
| Without assuming equal variances |  |  | -7.951 | 992.293 | .000 | -.27565 | .03467 | -.34369 | -.20762 |
| Total bilirubin（T-BIL, μmol/L） | Assuming homoscedasticity | 1.493 | .222 | 1.054 | 1043 | .292 | .38786 | .36783 | -.33390 | 1.10963 |
| Without assuming equal variances |  |  | 1.057 | 1041.562 | .291 | .38786 | .36678 | -.33184 | 1.10757 |
| Triglycerides（TG, mmol/L） | Assuming homoscedasticity | 63.630 | .000 | -9.075 | 1043 | .000 | -.31175 | .03435 | -.37915 | -.24434 |
| Without assuming equal variances |  |  | -8.914 | 731.117 | .000 | -.31175 | .03497 | -.38041 | -.24309 |

| **Group Statistics** | | | | | |
| --- | --- | --- | --- | --- | --- |
|  | Obesity | Number of cases | Mean Value | Standard Deviation | Mean of standard errors |
| Age (years) | 1 | 538 | 20.77 | 1.486 | .064 |
| 2 | 507 | 20.86 | 1.510 | .067 |
| Height（cm） | 1 | 538 | 167.216 | 6.8953 | .2973 |
| 2 | 507 | 173.643 | 7.9797 | .3544 |
| Body weight（kg） | 1 | 538 | 56.7844 | 3.38053 | .14575 |
| 2 | 507 | 77.9544 | 9.03608 | .40131 |
| Body Mass Index | 1 | 538 | 20.8574559378 | 1.24170134577 | .05353354631 |
| 2 | 507 | 28.6334023406 | 3.31903853961 | .14740367648 |
| Systolic blood pressure（mmHg） | 1 | 538 | 108.64 | 10.965 | .473 |
| 2 | 507 | 117.05 | 10.851 | .482 |
| Diastolic pressure (≥90mmHg) | 1 | 538 | 67.71 | 7.168 | .309 |
| 2 | 507 | 73.74 | 9.417 | .418 |
| Hematocrit/Red Blood Cell Volume Ratio（HCT） | 1 | 538 | 43.092 | 4.5423 | .1958 |
| 2 | 507 | 44.946 | 3.9899 | .1772 |
| Hemoglobin（HGB, g/L） | 1 | 538 | 142.68 | 18.076 | .779 |
| 2 | 507 | 149.56 | 15.942 | .708 |
| Mean corpuscular hemoglobin concentration（MCH, pg） | 1 | 538 | 29.062 | 2.2839 | .0985 |
| 2 | 507 | 29.205 | 1.8424 | .0818 |
| Mean corpuscular hemoglobin concentration（MCHC,g/L） | 1 | 538 | 330.40 | 11.080 | .478 |
| 2 | 507 | 332.26 | 10.149 | .451 |
| Mean corpuscular volume（MCV, fl） | 1 | 538 | 87.891 | 5.5608 | .2397 |
| 2 | 507 | 87.872 | 4.4873 | .1993 |
| Uniform bodyMean Platelet Volume (MPV, fl) | 1 | 537 | 10.889 | .9781 | .0422 |
| 2 | 507 | 10.908 | .9383 | .0417 |
| Platelet Volume Fraction (PCT, %) | 1 | 538 | .2970 | .06317 | .00272 |
| 2 | 507 | .3072 | .05949 | .00264 |
| Platelet Volume Distribution Width (PDW, CV%) | 1 | 538 | 14.092 | 2.1237 | .0916 |
| 2 | 507 | 14.145 | 2.0671 | .0918 |
| Platelet count (PLT) | 1 | 538 | 274.80 | 64.643 | 2.787 |
| 2 | 507 | 284.00 | 61.313 | 2.723 |
| Red Blood Cells (RBC) | 1 | 538 | 4.9119 | .51251 | .02210 |
| 2 | 507 | 5.1238 | .48424 | .02151 |
| Red blood cell distribution width（RDW） | 1 | 538 | 13.236 | 1.2764 | .0550 |
| 2 | 507 | 13.052 | .9398 | .0417 |
| White blood cells (WBC) | 1 | 538 | 6.6273 | 1.48994 | .06424 |
| 2 | 507 | 7.1597 | 1.60198 | .07115 |
| Alanine transaminase (ALT, U/L） | 1 | 538 | 18.8385 | 14.85398 | .64040 |
| 2 | 507 | 24.7167 | 18.14166 | .80570 |
| Glutamic pyruvic transaminase（AST, U/L） | 1 | 538 | 19.4129 | 7.73356 | .33342 |
| 2 | 507 | 21.0371 | 16.79893 | .74607 |
| AST:ALT | 1 | 538 | 1.1841 | .40070 | .01728 |
| 2 | 507 | .9699 | .34210 | .01519 |
| Blood Urea Nitrogen（BUN, mmol/L） | 1 | 538 | 4.4347 | 1.15316 | .04972 |
| 2 | 507 | 4.4567 | 1.10336 | .04900 |
| Total cholesterol（CHOL, mmol/L） | 1 | 538 | 3.9048 | .62380 | .02689 |
| 2 | 507 | 4.0800 | .73691 | .03273 |
| Creatinine（CREA, μmol/L） | 1 | 538 | 76.4451 | 11.26444 | .48564 |
| 2 | 507 | 80.3884 | 15.11795 | .67141 |
| Blood glucose（GLU, mmol/L） | 1 | 538 | 5.0039 | .38357 | .01654 |
| 2 | 507 | 5.0578 | .59396 | .02638 |
| HDL-C （mmol/L） | 1 | 538 | 1.4230 | .27642 | .01192 |
| 2 | 507 | 1.2409 | .23943 | .01063 |
| LDL-C (mmol/L) | 1 | 538 | 2.1773 | .50979 | .02198 |
| 2 | 507 | 2.4530 | .60374 | .02681 |
| Total bilirubin（T-BIL, μmol/L） | 1 | 538 | 13.9230 | 6.21345 | .26788 |
| 2 | 507 | 13.5352 | 5.64108 | .25053 |
| Triglycerides（TG, mmol/L） | 1 | 538 | .8438 | .35214 | .01518 |
| 2 | 507 | 1.1555 | .70942 | .03151 |
