# Supplementary material for: Associations between squalene epoxidase gene polymorphisms and obesity.
Source: PeerJ journal article supplement (doi:10.7717/peerj.19635), 2025-01-01
Supplement: The_dataset_for_the_control_group_SQLE.xlsx [file The_dataset_for_the_control_group_SQLE.xlsx]

## Sheet: Sheet1
Gender (1=male, 2=female)	Ethnicity (1 = Han, 2 = Uyghur, 3 = Kazakh, 4 = Hui, 5 = Mongol, 6 = Kyrgyz, 7 = Manchu, 8 = Zhuang, 9 = Tajik, 10 = Daur, 11 = Uzbek, 12 = Xibe, 13 = Gelao, 14 = Tibetan, 15 = Tatar, 16 = Salar)	Age (years)	rs10104486	rs2288312	Height (cm)	Weight(kg)	Body Mass Index,BMI (18.5-22.99KG/M^2 control group, >25 included in the obese group)	Systolic Blood Pressure,SBP (≥140 mmHg)	Diastolic Blood Pressure,DBP(≥90mmHg)	Hematocrit,HCT (male: 42%-49%; female: 37%-43%)	Hemoglobin ,HGB (male: 120-165 g/L; female: 110-150 g/L)	Mean Corpuscular Hemoglobin Concentration，MCH(27-31pg)	Mean Hemoglobin Concentration of Red BloodCells,MCHC (310-370 g/L)	Mean Corpuscular Volume,MCV (80-90 fl)	Mean Platelet Volume,MPV (9.0-13fl)	Platelet Crit,PCT (0.11%-0.23%)	Platelet volume Distribution width,PD(15-20CV%)	Platelet,PLT ((100-300)×10^9/L)	Red Blood Cells,RBC(4.3-5.8×10^12/L)	Red Blood Cell Distribution Width,RDW（Male：10-16%；Female：10-16%）	White Blood Cells,WBC((3.5-9.5)x 10^9/L)	Alanine Aminotransferase,ALT(0-40U/L）	Aspartate Aminotransferase,AST(0-37U/L)	AST:ALT（ 0.80-1.5）	Blood Urea Nitrogen,BUN(2.9-7.5mmol/L)	Total Cholesterol,CHOL（0-5.2mmol/L）	Creatinine,CREA（58-110μmol/L）	Glucose（3.9-6.1mmol/L）	HDL-C（1.03-1.55mmol/L）	LDL-C(1.9-3.8mmol/L)	Total Bilirubin,T-BIL（5.13-22.24μmol/L）	Triglycerides,TG（0-1.69mmol/L）
1	1	20	C/C	G/G	170	55	20.202	120	60	48.5	160	28.2	330	85.4	10	0.26	13.1	264	5.68	12.7	7.15	14.46	13.44	0.93	5.66	3.56	79.49	5.06	1.57	1.68	18.17	0.82
1	2	21	C/C	G/G	178	62	22.7732	100	70	45.4	150	31.2	330	94.4	10.2	0.23	12.9	225	4.81	13.1	7.46	11.41	11.73	1.03	4.74	3.09	67.29	4.31	1.45	1.45	16.06	0.68
1	1	20	C/C	G/G	178	55	20.202	100	70	50.7	164	28.6	323	88.5	11.2	0.27	14.1	238	5.73	13.3	7.25	11.27	15.13	1.34	3.8	3.78	94.8	5.48	1.32	2.32	11.11	0.9
1	1	21	C/C	G/G	178	58	21.3039	135	85	47.7	162	30.3	340	89.3	11	0.21	13.8	188	5.34	12.3	7.02	28.07	21.86	0.78	5.09	4.18	90.42	6.13	1.24	2.49	18.99	1.73
2	3	22	C/C	G/G	165	54	19.8347	112	72	37.9	122	27.3	322	84.8	11.5	0.28	14.9	247	4.47	13.5	6.31	16.44	20.15	1.23	3.98	3.85	71.98	5.08	1.79	1.85	12.03	0.46
1	1	20	C/C	G/G	175	54	19.8347	117	70	45.5	151	29.8	332	89.9	9	0.19	10.9	210	5.06	12.4	6.99	10.63	22.15	2.08	4	3.29	77.15	4.79	1.35	1.64	14.12	0.78
1	2	23	C/C	G/G	171	59	21.6713	114	60	45.8	153	29.1	334	87.1	13.4	0.24	21.5	176	5.26	12.8	6.29	30.01	24.87	0.83	4.02	4.76	88.01	5.2	1.53	2.96	14.8	0.69
2	1	20	C/C	G/G	165	51	18.7328	122	70	43	146	30.4	340	89.4	8.8	0.34	10.1	390	4.81	11.8	7.14	22.44	22.26	0.99	5.37	4.66	86.96	4.79	1.54	2.63	23.41	2.47
2	1	20	A/A	A/G	158	56	20.5693	110	70	42.9	140	31	326	95.1	10.8	0.31	13.2	283	4.51	12.9	6.03	10.28	11.75	1.14	4.93	3.71	70.83	4.75	1.27	2.29	8.44	0.52
2	1	20	C/C	G/G	175	60	22.0386	110	70	42	136	28.8	324	89	10.1	0.33	12.5	328	4.72	13.4	6.45	12.34	18.18	1.47	5.85	3.93	74.32	5.02	1.48	2.09	6.73	0.98
2	1	22	A/A	A/G	168	53	19.4674	100	60	45.6	148	31.4	325	96.6	13.7	0.28	19.1	203	4.72	12.3	8.51	14.24	15.15	1.06	5.76	3.32	73.32	4.79	1.43	1.84	9.43	0.61
1	1	20	C/C	G/G	147	55	20.202	110	70	51.1	166	29.5	325	90.9	10.5	0.3	13.3	288	5.62	13.6	9.09	36.82	17.32	0.47	3.42	4.03	93.57	5.38	1.38	2.29	11.77	0.66
1	1	20	C/C	G/G	177	57	20.9366	90	60	49.6	166	29.2	335	87.2	10.9	0.29	15.5	269	5.69	13.7	6.64	17.39	14.45	0.83	4.87	4.2	87.12	5.35	1.26	2.52	12.38	1.47
2	1	18	C/C	G/G	172	54	19.8347	100	60	39.3	127	30	323	92.9	10.6	0.27	12.6	251	4.23	13.3	6.19	35.84	23	0.64	4.73	2.82	81.63	4.92	1	1.57	16.37	0.68
1	1	19	C/C	G/G	178	52	19.1001	110	80	47.6	155	29.4	326	90.3	10.4	0.25	13.2	245	5.27	12.8	8.68	9.85	14.32	1.45	3.65	3.21	73.8	5.49	0.98	1.99	14.45	0.79
2	2	21	C/C	G/G	154	51	18.7328	90	60	38	126	31	332	93.4	12.9	0.25	17.3	197	4.07	12.3	4.79	20.49	17.32	0.85	8.09	3.35	68.82	5.03	1.46	1.78	11.93	0.44
2	2	20	C/C	G/G	164	58	21.3039	120	82	45.4	149	29.3	328	89.4	11.3	0.34	14.5	301	5.08	13.5	7.12	10.94	16.48	1.51	3.29	4.02	74.21	5.02	1.53	2.31	13.18	0.72
2	3	20	C/C	G/G	157	53	19.4674	118	70	42.7	144	29.8	337	88.2	12.3	0.24	17.8	197	4.84	13.3	5.3	7.78	14.14	1.82	2.75	4.37	67.65	4.31	1.62	2.47	16.55	0.71
2	2	21	C/C	G/G	162	57	20.9366	120	74	34.2	105	24.4	307	79.4	11.5	0.36	15	309	4.31	15.2	5.47	12.25	13.35	1.09	6.56	3.82	76.25	4.56	1.38	2.11	6.77	0.63
1	1	20	C/C	G/G	171	62	22.7732	130	80	49.3	167	32.6	339	96.3	11.3	0.29	14.1	261	5.12	12.2	5.02	18.51	20.31	1.1	4.96	3.43	78.11	4.81	1.31	1.82	39	0.9
2	2	23	C/C	G/G	156	52	19.1001	90	60	41.3	137	30	332	90.6	10.8	0.36	14	331	4.56	12.9	10.02	12.6	15.97	1.27	3.53	4.43	74.41	5.01	1.77	2.47	7.76	0.42
2	1	23	C/C	G/G	172	56	20.5693	102	60	42.8	137	27.6	320	86.3	12.2	0.28	16.2	231	4.96	14.5	5.64	12.54	15.13	1.21	5.65	4.41	47.53	5.11	1.4	2.69	9.28	0.63
2	1	20	C/C	G/G	168	54	19.8347	110	70	41.7	137	30.2	329	91.9	10.2	0.27	12.2	262	4.54	13.1	4.66	16.22	18.36	1.13	4.14	3.83	71.56	4.69	1.76	1.78	18.61	0.61
2	1	20	C/C	G/G	165	53	19.4674	100	60	38.9	125	28.4	321	88.4	12.6	0.37	16.7	297	4.4	14	7.02	13.18	17.69	1.34	6.28	5.15	92.84	4.89	1.76	2.75	9.03	0.84
2	2	22	C/C	G/G	158	59	21.6713	122	74	35.5	114	28.2	321	87.9	10.7	0.37	13.5	343	4.04	14.4	5.82	14.03	19.16	1.37	3.35	5.1	74.78	4.77	1.43	3.34	10.04	0.82
2	1	21	C/C	G/G	163	51	18.7328	100	60	46.3	152	31.3	328	95.5	9.9	0.31	12	316	4.85	12.7	6.85	27.72	22.03	0.79	4.74	4.49	65.43	4.8	1.54	2.42	9.07	1.17
2	1	20	A/C	A/G	169	58	21.3039	110	70	38.50	119.00	27.50	309.00	89.10	10.40	0.25	13.60	237.00	4.32	15.00	3.97	12.23	14.00	1.14	3.30	4.81	69.54	5.18	2.24	2.34	9.73	0.33
2	2	19	A/C	A/G	162	60	22.0386	120	70	39.40	130.00	29.50	330.00	89.50	10.20	0.28	12.40	273.00	4.40	12.70	7.51	19.17	17.86	0.93	2.50	4.47	63.00	5.06	1.50	2.83	12.22	0.71
2	1	20	A/A	A/A	155	55	20.202	100	60	40.50	130.00	30.70	321.00	95.70	10.10	0.27	12.50	265.00	4.23	12.60	6.01	9.09	16.70	1.84	4.59	3.63	63.36	5.19	1.81	1.70	12.36	0.48
2	2	19	A/C	A/G	161	55	20.202	110	70	35.60	115.00	28.30	323.00	87.70	12.20	0.36	17.80	297.00	4.06	15.60	6.65	39.92	30.57	0.77	3.40	4.28	73.95	4.86	1.56	2.47	11.65	0.67
2	2	22	A/C	A/G	156	54	19.8347	104	72	37.50	115.00	23.80	307.00	77.60	11.40	0.54	14.10	475.00	4.83	16.30	5.61	15.22	18.11	1.19	2.82	3.25	83.86	5.45	1.09	1.99	14.88	0.92
2	2	20	A/A	A/A	169	55	20.202	110	80	37.90	125.00	28.90	330.00	87.70	11.20	0.24	15.00	216.00	4.32	13.70	5.67	18.74	17.59	0.94	3.29	3.17	62.46	5.32	1.35	1.65	7.43	0.49
1	1	19	C/C	G/G	176	56	20.5693	114	70	45.10	153.00	29.10	339.00	85.90	11.40	0.28	15.30	244.00	5.25	12.30	9.74	12.65	13.60	1.08	4.80	3.00	90.50	5.58	1.24	1.48	6.28	0.55
2	3	21	A/C	A/G	164	60	22.0386	110	70	38.10	124.00	29.60	325.00	90.90	9.90	0.31	11.80	309.00	4.19	14.50	5.46	12.94	13.34	1.03	3.66	3.27	74.15	5.26	1.31	1.74	11.47	0.37
2	1	19	A/A	A/A	163	62	22.7732	110	70	40.70	135.00	31.80	332.00	96.00	10.00	0.29	12.30	291.00	4.24	12.30	7.58	16.19	14.46	0.89	3.48	3.31	77.53	4.95	1.58	1.53	10.97	0.62
2	1	18	A/A	A/A	162	51	18.7328	110	70	40.50	136.00	28.90	336.00	86.00	11.70	0.27	15.90	233.00	4.71	13.20	7.42	9.61	11.20	1.17	2.48	3.31	69.10	5.49	1.33	1.75	18.02	0.40
2	1	20	A/C	A/G	150	55	20.202	100	70	36.20	119.00	31.40	329.00	95.50	11.20	0.31	15.10	274.00	3.79	13.00	6.02	41.47	34.51	0.83	2.72	3.21	50.45	5.34	1.33	1.65	5.40	0.63
2	1	20	A/A	A/A	169	57	20.9366	118	78	39.60	128.00	30.60	323.00	94.70	10.80	0.28	13.60	259.00	4.18	12.30	6.14	16.66	19.49	1.17	4.60	4.13	64.97	5.14	2.03	1.84	15.01	0.55
2	1	19	A/C	A/G	170	54	19.8347	120	70	40.70	132.00	29.30	324.00	90.40	9.60	0.31	10.70	321.00	4.50	13.20	5.66	13.75	16.41	1.19	2.75	3.54	68.43	5.37	1.85	1.45	15.74	0.89
2	1	20	A/C	A/G	157	53	19.4674	100	70	38.60	124.00	28.40	321.00	88.50	12.90	0.25	19.40	192.00	4.36	13.50	6.97	17.48	19.29	1.10	5.22	3.59	60.33	5.50	1.50	1.90	6.89	0.43
2	1	20	A/A	A/A	164	57	20.9366	110	80	44.80	145.00	29.10	324.00	89.80	11.10	0.24	14.70	221.00	4.99	13.00	9.23	13.24	15.12	1.14	4.08	3.98	57.81	4.73	1.44	2.22	17.76	0.64
2	2	20	A/A	A/A	162	54	19.8347	104	70	44.00	145.00	30.40	330.00	92.20	10.10	0.32	12.80	313.00	4.77	12.50	7.82	12.57	17.10	1.36	3.56	3.76	76.56	5.63	0.99	2.31	9.39	2.15
2	2	20	A/C	A/G	165	57	20.9366	120	74	34.50	111.00	27.40	322.00	85.20	11.50	0.29	16.20	255.00	4.05	14.50	9.45	33.55	32.90	0.98	4.50	3.84	48.57	5.54	1.85	1.76	17.23	1.37
2	1	19	A/C	A/G	162	58	21.3039	114	72	39.50	126.00	21.70	319.00	68.10	10.80	0.31	12.00	289.00	5.80	14.90	6.65	43.93	37.11	0.84	3.61	3.58	64.73	4.73	1.59	1.75	8.19	0.69
2	1	19	A/A	A/A	171	52	19.1001	110	60	43.30	140.00	30.70	323.00	95.00	11.90	0.24	14.50	204.00	4.56	12.60	6.46	21.12	22.09	1.05	3.95	4.40	69.56	4.61	1.87	2.18	14.04	0.85
2	1	21	A/C	A/G	158	51	18.7328	110	70	41.20	133.00	30.30	323.00	93.80	11.30	0.33	13.60	289.00	4.39	13.70	6.43	6.25	14.10	2.26	2.52	3.59	57.89	4.94	1.67	1.73	13.58	0.58
2	1	21	A/C	G/G	164	60	22.0386	120	70	43.80	145.00	29.50	331.00	89.00	11.30	0.28	15.00	245.00	4.92	12.40	3.99	9.72	15.54	1.60	3.18	4.51	67.16	5.63	0.99	3.14	5.39	1.07
2	1	19	A/A	A/A	165	58	21.3039	102	70	40.20	132.00	29.40	328.00	89.50	10.70	0.27	13.00	187.00	4.49	13.70	6.34	63.28	27.56	0.44	3.28	3.65	72.16	4.62	1.31	1.99	11.77	1.20
2	1	20	A/C	A/G	160	51	18.7328	110	70	42.30	138.00	27.50	326.00	84.30	10.70	0.28	13.00	264.00	5.02	13.80	7.92	13.98	15.68	1.12	3.38	3.00	77.67	4.31	1.43	1.36	8.08	0.93
2	1	20	A/C	A/G	171	59	21.6713	100	60	39.60	130.00	28.30	328.00	86.30	11.30	0.33	14.70	292.00	4.59	13.90	5.63	13.81	16.84	1.22	3.06	3.91	79.68	4.45	1.24	2.32	21.14	0.92
2	1	20	A/A	A/A	164	51	18.7328	102	68	41.10	131.00	25.20	319.00	79.00	10.50	0.28	12.70	267.00	5.20	14.30	4.79	11.13	17.38	1.56	3.01	4.50	66.26	4.89	1.83	2.30	11.51	1.20
2	1	20	A/A	A/A	169	58	21.3039	110	70	41.60	136.00	31.30	327.00	95.60	9.90	0.22	11.60	223.00	4.35	12.90	7.41	21.05	22.73	1.08	3.90	3.21	66.12	4.29	1.34	1.65	14.62	0.72
2	1	19	A/C	G/G	164	52	19.1001	100	70	42.70	141.00	30.50	330.00	92.40	11.00	0.34	13.90	308.00	4.62	13.30	7.25	14.43	19.87	1.38	2.58	4.13	72.49	5.22	2.24	1.66	11.26	0.62
2	1	19	A/A	A/A	165	57	20.9366	100	70	39.20	130.00	33.00	332.00	99.50	10.90	0.27	13.10	252.00	3.94	12.00	5.70	8.17	17.90	2.19	4.45	3.54	62.66	5.42	1.54	1.88	10.83	0.58
2	1	20	A/C	A/G	157	53	19.4674	100	70	39.80	133.00	32.50	334.00	97.30	13.00	0.30	19.80	235.00	4.09	12.00	8.74	16.70	14.91	0.89	4.48	3.65	62.97	5.37	1.35	2.01	10.21	0.86
2	1	20	A/A	A/A	161	59	21.6713	100	70	35.70	116.00	28.30	325.00	87.10	10.40	0.29	12.60	281.00	4.10	12.60	5.32	16.13	14.79	0.92	2.87	3.31	62.47	4.99	1.45	1.66	5.81	0.80
2	1	20	A/C	A/G	151	52	19.1001	110	70	37.70	128.00	32.60	340.00	95.90	9.60	0.23	11.70	238.00	3.93	11.80	5.82	18.84	18.71	0.99	3.65	3.98	65.21	5.06	1.32	2.38	9.14	0.87
2	1	21	A/A	A/A	167	58	21.3039	110	70	28.70	83.00	20.10	289.00	69.70	10.30	0.51	12.20	497.00	4.12	16.50	5.45	13.98	17.68	1.26	4.35	3.37	70.49	4.44	1.36	1.80	8.65	0.63
1	1	21	A/C	A/G	184	58	21.3039	110	80	46.50	156.00	30.00	335.00	89.40	8.80	0.26	10.40	295.00	5.20	13.20	5.20	22.59	21.29	0.94	4.44	4.19	86.83	5.09	1.53	2.41	13.77	0.60
1	2	20	A/C	A/G	171	58	21.3039	120	70	47.90	162.00	28.70	338.00	84.80	11.70	0.28	16.20	241.00	5.65	13.60	6.16	25.38	26.09	1.03	4.77	4.39	77.88	5.02	1.50	2.49	10.45	0.79
2	1	20	A/C	A/G	167	52	19.1001	100	70	34.60	105.00	23.20	303.00	76.50	10.80	0.37	13.30	341.00	4.52	16.70	6.02	14.77	16.16	1.09	4.17	3.62	66.60	4.92	1.61	1.79	10.10	0.78
2	2	20	A/C	A/G	163	52	19.1001	100	70	38.60	120.00	29.10	311.00	93.70	11.00	0.27	13.70	247.00	4.12	13.30	4.38	24.49	21.54	0.88	2.92	4.11	64.31	4.90	1.61	2.31	10.73	0.45
2	1	19	A/A	A/A	163	52	19.1001	114	70	38.60	127.00	28.30	329.00	86.00	13.30	0.35	19.50	267.00	4.49	14.90	5.98	13.39	16.07	1.20	3.53	3.31	63.56	4.98	1.60	1.61	13.04	0.69
2	1	20	A/A	A/A	160	54	19.8347	110	70	41.20	141.00	31.10	342.00	90.90	11.80	0.24	16.30	200.00	4.53	11.90	5.85	11.44	14.80	1.29	5.89	3.46	57.97	5.67	1.44	1.90	12.61	0.44
1	1	19	A/A	A/A	173	61	22.4059	128	82	49.30	172.00	32.10	349.00	92.00	8.50	0.28	9.70	329.00	5.36	12.60	5.08	15.20	18.00	1.18	3.39	3.03	88.34	4.86	1.21	1.57	18.68	0.58
2	3	20	A/A	A/A	167	59	21.6713	100	70	37.10	119.00	26.50	321.00	82.60	11.10	0.32	14.00	287.00	4.49	14.50	5.95	16.11	14.65	0.91	4.01	3.36	61.41	4.70	1.60	1.64	8.42	0.53
2	1	19	A/C	A/G	154	54	19.8347	112	70	40.60	134.00	28.10	330.00	85.10	10.60	0.26	13.70	240.00	4.77	13.10	6.63	25.61	20.84	0.81	4.94	3.73	62.10	5.10	1.52	2.04	14.80	0.51
2	1	21	A/A	A/A	162	53	19.4674	110	70	39.90	128.00	26.70	321.00	83.10	13.50	0.23	21.90	172.00	4.80	13.70	7.85	11.31	13.59	1.20	4.08	4.10	69.90	4.49	2.15	1.73	14.08	0.56
2	3	21	A/C	A/G	166	60	22.0386	120	84	38.50	127.00	28.30	330.00	85.70	10.70	0.34	13.20	313.00	4.49	11.70	5.89	12.36	17.21	1.39	3.14	3.18	58.02	5.01	1.45	1.63	12.31	0.51
2	1	20	A/C	A/G	162	55	20.202	120	70	43.00	142.00	30.60	330.00	92.70	11.70	0.28	15.40	240.00	4.64	12.40	5.80	15.35	17.87	1.16	3.58	3.26	66.94	5.30	1.46	1.65	13.61	0.69
2	2	20	A/A	A/A	168	56	20.5693	110	70	43.70	145.00	30.80	332.00	92.80	9.50	0.29	11.90	307.00	4.71	12.80	5.79	12.96	15.78	1.22	2.55	3.73	63.42	5.08	1.33	2.28	19.05	0.65
2	1	20	A/C	A/G	170	52	19.1001	100	70	41.20	134.00	31.10	325.00	95.60	11.30	0.28	14.10	247.00	4.31	12.20	5.68	14.98	16.39	1.09	5.25	4.08	73.15	4.45	1.37	2.55	14.77	0.46
2	2	20	A/C	A/G	160	56	20.5693	110	70	38.30	122.00	25.40	319.00	79.80	10.30	0.37	13.00	361.00	4.80	15.50	6.72	5.36	20.02	3.74	4.92	4.27	79.52	4.61	1.46	2.44	6.59	1.01
2	2	20	A/C	A/G	163	51	18.7328	110	70	37.80	128.00	30.50	339.00	90.00	10.10	0.28	12.70	273.00	4.20	11.80	5.80	14.36	13.96	0.97	4.00	3.38	54.84	4.60	1.51	1.76	10.09	0.40
1	1	20	A/C	A/G	168	60	22.0386	110	80	49.50	167.00	29.90	337.00	88.70	9.30	0.31	10.80	339.00	5.58	12.40	6.39	31.00	21.53	0.69	5.48	4.01	78.08	5.02	1.29	2.55	11.98	0.85
2	1	20	A/A	A/A	164	58	21.3039	106	70	38.80	128.00	27.90	330.00	84.70	11.00	0.29	13.90	259.00	4.58	12.60	7.11	14.89	16.31	1.10	3.67	4.12	70.41	4.81	1.51	2.43	10.62	0.61
2	1	20	A/A	A/A	158	54	19.8347	100	70	37.30	112.00	24.00	300.00	80.00	12.20	0.32	17.00	264.00	4.66	15.00	4.73	17.51	19.86	1.13	3.45	4.61	72.15	4.66	1.85	2.45	13.38	0.94
2	1	21	A/A	A/A	164	54	19.8347	100	70	41.80	133.00	29.80	318.00	93.70	11.50	0.27	14.90	233.00	4.46	12.60	8.48	10.21	14.26	1.40	3.85	4.08	71.65	4.90	1.75	2.09	8.96	1.20
2	1	19	A/A	A/A	161	59	21.6713	110	70	43.30	139.00	30.50	321.00	95.20	9.50	0.35	10.80	368.00	4.55	14.10	6.37	13.50	15.43	1.14	2.85	4.37	66.48	5.45	1.59	2.65	7.39	0.75
2	2	21	A/A	A/A	165	59	21.6713	110	70	39.10	129.00	27.60	330.00	83.70	10.50	0.26	12.80	247.00	4.67	13.10	6.08	17.33	26.98	1.56	2.90	3.49	73.32	4.65	1.44	1.87	10.02	0.43
2	2	22	A/A	A/A	162	54	19.8347	100	70	41.70	136.00	28.40	326.00	87.10	8.90	0.23	10.30	257.00	4.79	13.70	4.45	14.50	17.43	1.20	2.19	3.53	76.79	5.06	1.39	1.98	11.35	0.52
1	2	20	A/C	A/G	163.5	58	21.3039	106	60	45.40	155.00	29.90	341.00	87.50	9.30	0.30	11.20	318.00	5.19	12.90	5.94	27.07	17.21	0.64	3.56	6.17	83.79	5.83	1.34	4.44	9.72	1.05
2	2	21	A/A	A/A	162	55	20.202	90	60	40.20	131.00	27.70	326.00	85.00	11.00	0.30	15.10	271.00	4.73	12.70	5.88	12.34	14.65	1.19	4.64	4.12	88.70	5.06	1.95	2.07	6.17	0.80
2	1	19	A/A	A/A	172	55	20.202	100	60	41.20	139.00	28.50	337.00	84.60	10.40	0.33	13.10	320.00	4.87	12.80	5.22	8.74	13.50	1.54	5.82	4.69	87.00	5.48	1.47	2.84	11.88	1.05
2	1	21	A/A	A/A	157	51	18.7328	90	60	37.60	127.00	32.30	338.00	95.70	10.30	0.25	13.20	243.00	3.93	11.60	6.35	18.06	21.18	1.17	4.34	3.56	63.28	5.13	1.33	2.06	17.31	0.91
2	2	19	A/A	A/A	156	59	21.6713	110	70	42.80	142.00	29.90	332.00	90.10	9.50	0.24	11.30	249.00	4.75	13.80	6.53	22.31	22.19	0.99	2.46	3.73	84.47	5.23	1.39	2.17	12.60	0.49
1	1	21	A/C	A/G	178	62	22.7732	120	70	50.70	174.00	29.70	343.00	86.70	10.60	0.27	13.50	253.00	5.85	13.10	6.67	20.84	17.75	0.85	5.33	3.99	115.57	6.18	1.40	2.36	12.25	0.96
1	1	19	A/C	A/G	184	62	22.7732	110	72	49.00	160.00	25.90	327.00	79.40	12.00	0.23	16.60	195.00	6.17	14.10	7.63	9.57	14.55	1.52	6.93	4.35	91.03	5.34	1.57	2.38	11.49	0.63
2	2	22	A/C	A/G	162	53	19.4674	100	60	42.20	135.00	27.20	320.00	85.10	10.80	0.31	13.50	290.00	4.96	14.60	7.46	28.27	28.62	1.01	3.16	3.32	70.40	5.35	1.33	1.72	10.04	1.06
2	2	22	A/C	A/G	165.5	55	20.202	112	74	40.30	135.00	29.70	335.00	88.60	10.70	0.28	14.00	261.00	4.55	13.20	7.12	14.23	14.16	1.00	3.83	3.67	66.65	5.31	1.38	2.33	12.63	0.71
2	2	21	A/A	A/A	162	52	19.1001	110	60	39.50	127.00	28.20	322.00	87.60	10.20	0.44	12.50	427.00	4.51	15.00	9.27	13.01	19.50	1.50	3.98	3.77	79.37	5.34	1.58	2.14	7.92	0.44
2	2	22	A/A	A/A	165	54	19.8347	100	70	39.50	129.00	27.60	327.00	84.60	11.40	0.37	15.60	322.00	4.67	13.70	6.82	15.29	23.26	1.52	3.95	2.63	83.90	5.38	1.58	0.87	14.09	0.44
2	2	23	A/A	A/A	158	56	20.5693	110	70	38.40	124.00	29.10	323.00	90.10	12.30	0.32	17.30	261.00	4.26	13.80	10.17	37.19	24.03	0.65	5.54	3.48	80.19	5.24	1.46	1.89	5.05	0.92
2	2	23	A/C	A/G	160.5	53	19.4674	100	60	39.90	130.00	30.10	326.00	92.40	11.70	0.27	15.60	233.00	4.32	13.40	6.87	18.94	17.94	0.95	3.70	3.41	76.11	4.93	1.59	1.78	11.00	0.61
1	2	22	A/A	A/A	168	59	21.6713	100	70	47.20	169.00	30.10	358.00	84.00	9.10	0.24	11.10	263.00	5.62	11.90	7.65	40.26	26.73	0.66	4.49	3.71	94.64	4.99	1.10	2.45	13.99	0.77
2	2	25	A/A	A/A	159	59	21.6713	114	70	36.70	123.00	28.30	335.00	84.40	12.90	0.33	18.40	255.00	4.35	13.60	8.80	27.69	19.78	0.71	5.46	3.35	73.17	5.23	1.26	1.92	8.73	0.99
2	2	22	A/C	A/G	161.5	55	20.202	110	70	39.90	128.00	29.10	321.00	90.70	11.90	0.28	15.90	238.00	4.40	12.90	5.56	84.70	61.77	0.73	3.85	4.80	62.11	5.30	2.12	2.47	17.73	1.22
1	2	21	A/C	A/G	180	62	22.7732	124	76	47.20	157.00	31.20	333.00	93.80	10.60	0.25	14.70	235.00	5.03	13.50	5.71	17.41	23.91	1.37	5.39	4.61	104.63	5.43	1.61	2.71	10.90	0.88
2	2	22	A/A	A/A	152.5	54	19.8347	106	68	43.00	143.00	27.60	333.00	82.90	11.20	0.32	14.30	282.00	5.19	12.50	10.34	22.59	20.17	0.89	6.38	4.17	68.99	5.38	1.21	2.70	9.54	1.42
2	2	24	A/A	A/A	169	52	19.1001	112	70	38.90	134.00	28.30	344.00	82.20	9.90	0.36	12.60	366.00	4.73	13.30	6.10	13.58	16.52	1.22	5.45	3.69	78.97	5.26	1.23	2.22	9.21	0.66
1	2	23	A/C	A/G	173	61	22.4059	112	78	44.30	145.00	29.00	327.00	88.60	10.70	0.30	13.60	285.00	5.00	14.10	9.33	93.44	62.91	0.67	7.14	5.75	79.10	4.90	1.84	3.53	22.13	0.92
2	2	19	A/A	A/A	160	55	20.202	118	72	32.10	96.00	20.50	299.00	68.60	11.70	0.41	18.60	349.00	4.68	19.20	5.47	12.80	17.16	1.34	4.51	3.81	72.11	5.01	1.31	2.16	9.54	0.69
1	2	21	C/C	G/G	172	59	21.6713	114	72	43.20	148.00	29.50	343.00	86.10	11.30	0.24	15.60	210.00	5.02	13.10	7.26	12.97	22.96	1.77	6.42	3.66	97.53	5.52	1.38	2.01	12.86	1.34
2	1	20	A/A	A/A	160	57.5	21.1203	122	74	42.50	141.00	31.40	332.00	94.70	12.60	0.22	17.60	174.00	4.49	13.00	6.67	14.70	14.48	0.99	5.05	3.66	75.56	5.17	1.74	1.63	14.85	0.78
1	2	22	A/C	A/G	173.5	60	22.0386	120	70	46.60	152.00	29.60	326.00	90.70	10.10	0.35	12.80	346.00	5.14	13.20	6.51	84.58	80.10	0.95	4.18	3.84	97.17	5.18	1.54	2.05	6.27	0.92
2	2	23	A/A	A/A	158	51	18.7328	110	60	33.10	95.00	19.00	287.00	66.30	11.80	0.31	17.70	261.00	4.99	17.30	7.05	10.59	11.92	1.13	5.62	3.83	58.89	5.35	1.64	1.94	19.63	0.91
2	2	22	A/C	A/G	165.5	58	21.3039	122	80	42.30	135.00	27.10	319.00	84.80	10.40	0.37	13.70	358.00	4.99	15.60	6.95	31.68	31.32	0.99	3.31	5.49	85.08	5.26	1.52	3.41	15.40	2.30
2	2	20	A/C	A/G	154	51	18.7328	102	70	37.70	122.00	30.70	324.00	94.70	10.70	0.44	13.10	412.00	3.98	12.50	7.70	12.69	16.98	1.34	6.69	2.78	73.63	4.92	0.95	1.59	10.49	0.99
2	2	20	C/C	A/G	160	54	19.8347	122	84	38.30	130.00	29.10	339.00	85.70	9.60	0.33	11.20	340.00	4.47	12.60	7.20	19.44	19.11	0.98	3.86	4.35	71.90	4.72	1.41	2.61	8.31	0.89
2	2	20	A/A	A/A	168.5	56	20.5693	120	80	35.70	115.00	28.70	322.00	89.00	10.40	0.29	13.30	282.00	4.01	12.20	5.00	12.03	18.08	1.50	4.28	3.42	65.07	5.13	1.62	1.65	4.77	0.69
2	2	22	A/A	A/A	157	54	19.8347	100	70	38.20	117.00	22.30	306.00	72.80	10.60	0.42	13.40	398.00	5.25	17.90	4.74	41.68	25.99	0.62	4.44	4.85	72.91	5.14	1.46	2.96	13.76	1.00
2	2	23	A/A	A/A	158	52	19.1001	104	70	39.70	136.00	27.30	343.00	79.70	12.20	0.41	16.60	334.00	4.98	13.80	7.83	13.23	15.66	1.18	3.83	3.05	67.87	4.77	1.43	1.42	9.56	0.82
2	2	22	A/C	A/G	169.5	60	22.0386	100	60	36.80	113.00	21.90	307.00	71.20	10.20	0.40	12.10	390.00	5.17	17.80	7.78	14.15	14.20	1.00	3.01	3.31	67.88	5.24	1.44	1.66	11.19	0.51
2	2	22	A/A	A/A	165	60	22.0386	100	60	39.50	127.00	29.20	322.00	90.80	9.90	0.30	12.20	305.00	4.35	13.70	6.62	22.19	13.43	0.61	3.96	3.61	60.91	4.83	1.16	2.01	5.95	2.64
2	2	23	A/A	A/A	161	55	20.202	120	70	31.70	95.00	21.00	300.00	70.10	11.60	0.50	17.50	426.00	4.52	17.80	9.59	12.72	22.24	1.75	3.87	4.61	91.47	4.63	1.30	2.90	9.38	0.83
1	2	22	A/C	A/G	171	59	21.6713	110	70	44.40	150.00	29.10	338.00	86.20	11.50	0.33	15.70	286.00	5.15	12.60	6.92	13.59	15.46	1.14	9.09	3.87	90.83	5.10	1.42	2.25	16.20	0.46
2	2	23	A/A	A/A	163.5	56	20.5693	110	70	40.30	133.00	28.80	330.00	87.20	12.30	0.42	17.10	340.00	4.62	13.10	9.88	15.06	17.23	1.14	2.98	3.69	76.54	4.65	1.16	2.19	13.13	0.89
1	2	21	A/A	A/A	182	59	21.6713	110	68	47.60	167.00	29.60	351.00	84.20	10.90	0.33	14.10	304.00	5.65	12.40	6.21	13.52	15.14	1.12	4.03	3.33	93.76	5.53	1.03	1.99	25.50	0.97
2	2	23	A/C	A/G	170	60	22.0386	120	80	35.20	110.00	24.00	313.00	76.90	10.60	0.33	13.30	314.00	4.58	17.40	5.95	18.51	20.02	1.08	2.76	5.39	75.88	5.39	1.56	3.29	12.83	0.76
2	2	22	A/A	A/A	168	51	18.7328	110	72	35.70	113.00	24.50	317.00	77.40	12.00	0.27	15.50	222.00	4.61	16.80	4.08	8.71	17.35	1.99	3.50	3.39	73.02	4.60	1.73	1.51	10.94	0.52
2	2	24	A/A	A/A	172	56	20.5693	114	70	40.70	136.00	29.30	334.00	87.70	11.00	0.30	14.20	273.00	4.64	12.40	4.65	13.22	18.71	1.42	5.67	4.11	66.05	5.93	1.61	2.22	9.66	0.92
2	2	22	A/C	A/G	157	60	22.0386	110	74	36.00	114.00	27.40	317.00	86.50	10.80	0.25	12.80	232.00	4.16	14.10	4.48	146.13	85.44	0.58	6.45	3.74	65.48	5.21	1.70	1.73	5.38	0.65
1	2	24	A/A	A/A	175	59	21.6713	106	64	48.10	167.00	30.90	347.00	89.10	10.20	0.24	12.80	238.00	5.40	12.40	7.28	12.59	16.10	1.28	5.30	3.58	96.30	5.32	1.28	2.02	32.24	1.19
2	2	25	A/A	A/A	158	61	22.4059	110	70	36.90	126.00	28.80	341.00	84.40	9.70	0.27	12.50	277.00	4.37	13.30	3.55	11.61	13.78	1.19	3.09	3.63	65.63	4.86	1.07	2.28	8.78	0.80
1	2	21	A/A	A/A	167	60	22.0386	110	70	46.60	160.00	29.00	343.00	84.60	11.10	0.31	15.10	279.00	5.51	12.90	4.13	31.24	31.80	1.02	4.83	2.84	77.00	4.84	1.02	1.58	39.55	0.98
2	2	21	A/C	A/G	161	59	21.6713	120	70	39.00	131.00	28.80	336.00	85.70	10.30	0.32	13.10	308.00	4.55	12.70	5.98	27.37	27.09	0.99	5.32	3.84	66.65	4.87	0.90	2.58	9.68	1.08
2	2	22	A/C	A/G	168	58	21.3039	118	70	37.20	117.00	24.40	315.00	77.50	11.50	0.31	15.10	270.00	4.80	15.80	5.45	15.84	16.21	1.02	3.08	3.66	67.66	5.36	1.35	2.08	5.04	0.47
2	2	23	A/A	A/A	160	58	21.3039	114	70	36.30	113.00	22.10	311.00	70.90	12.00	0.32	15.50	263.00	5.12	18.20	5.07	10.84	18.24	1.68	4.00	3.23	73.92	4.63	1.51	1.49	9.14	0.75
1	2	21	A/C	A/G	168	62	22.7732	120	70	48.80	165.00	30.30	338.00	89.70	10.60	0.22	13.90	208.00	5.44	12.70	8.14	19.13	18.31	0.96	5.53	4.22	99.19	4.87	1.38	2.59	11.42	0.43
1	2	23	A/A	A/A	170	60	22.0386	114	70	48.40	160.00	28.80	331.00	87.10	10.60	0.26	13.20	242.00	5.56	14.80	6.70	19.34	19.83	1.03	3.84	3.86	68.73	6.01	1.37	2.23	9.67	0.78
1	2	23	A/C	A/G	171	62	22.7732	110	74	44.70	151.00	30.80	338.00	91.00	11.60	0.22	16.50	186.00	4.91	13.20	5.48	22.86	24.61	1.08	4.20	3.70	81.98	4.98	1.28	2.16	16.53	0.82
1	2	22	A/C	A/G	169	58	21.3039	112	70	48.80	170.00	30.10	348.00	86.50	12.00	0.29	14.80	243.00	5.64	12.40	7.44	79.86	42.67	0.53	3.90	5.03	98.61	5.62	1.02	3.34	13.23	1.98
2	2	20	A/C	A/G	164	58	21.3039	102	64	39.10	134.00	27.10	343.00	79.10	11.20	0.44	14.20	392.00	4.94	13.20	9.27	10.43	16.41	1.57	3.72	3.67	81.05	4.75	1.15	2.31	10.63	0.45
1	2	22	A/C	A/G	173	60	22.0386	118	70	46.90	155.00	31.20	330.00	94.40	10.00	0.37	12.40	369.00	4.97	13.40	8.02	17.65	22.50	1.27	3.65	5.49	72.06	4.99	1.75	3.31	8.42	2.22
1	2	26	A/A	A/A	172	51	18.7328	116	80	48.40	167.00	29.00	345.00	84.20	11.40	0.35	15.40	312.00	5.75	13.10	6.56	16.27	16.37	1.01	7.44	3.36	77.53	4.41	1.35	1.77	15.70	0.45
1	2	24	A/A	A/A	168	62	22.7732	114	72	42.50	137.00	27.70	322.00	85.90	10.50	0.27	13.30	259.00	4.95	13.70	5.27	41.56	38.76	0.93	4.41	4.28	79.96	4.49	1.47	2.52	11.89	0.89
2	2	22	A/C	A/G	158	51	18.7328	110	70	40.00	135.00	28.80	338.00	85.30	10.60	0.35	12.70	336.00	4.69	12.80	6.81	19.10	19.94	1.04	4.06	4.29	75.34	4.72	2.00	1.99	18.25	0.43
2	1	19	A/C	A/G	162	52	19.1001	120	80	36.30	125.00	30.20	344.00	87.70	10.20	0.29	12.10	282.00	4.14	13.00	6.05	10.33	15.58	1.51	3.80	3.19	77.87	4.81	1.41	1.52	18.09	1.00
1	2	22	A/C	A/G	167	59	21.6713	90	60	44.50	153.00	28.80	344.00	83.60	11.20	0.29	14.20	261.00	5.32	14.10	6.06	14.35	15.12	1.05	5.44	3.62	95.53	4.27	1.08	2.22	7.80	0.66
2	2	20	A/A	A/A	160	60	22.0386	102	60	39.60	131.00	29.20	331.00	88.40	12.40	0.34	17.10	276.00	4.48	12.90	13.00	12.28	12.01	0.98	3.98	4.12	64.80	4.68	1.28	2.62	9.91	0.72
2	2	21	A/C	A/G	154	54	19.8347	110	70	39.40	129.00	29.90	327.00	91.20	11.40	0.47	13.90	410.00	4.32	14.70	6.93	27.42	22.89	0.83	1.73	3.96	62.89	4.64	1.48	2.26	20.20	0.58
2	2	19	A/C	A/G	167	57	20.9366	122	80	39.60	129.00	27.60	326.00	84.60	12.10	0.32	17.60	264.00	4.68	13.80	7.57	10.44	15.06	1.44	4.07	4.93	65.10	4.91	1.14	3.35	7.36	1.07
2	1	20	A/C	A/G	165.5	54	19.8347	120	70	40.10	128.00	27.40	319.00	85.70	11.70	0.34	14.40	292.00	4.68	15.10	5.49	14.79	18.57	1.26	3.47	3.86	89.59	5.27	1.65	1.93	14.63	1.01
2	2	21	A/C	A/G	165	60	22.0386	120	80	37.10	123.00	29.30	332.00	88.30	10.00	0.36	12.30	358.00	4.20	13.40	4.61	13.43	17.79	1.32	4.45	3.64	71.25	4.49	1.67	1.79	6.46	0.48
2	2	22	A/C	A/G	168	57	20.9366	120	80	41.10	134.00	29.30	326.00	89.70	11.30	0.44	14.20	391.00	4.58	14.10	7.78	22.74	21.01	0.92	3.57	4.18	73.62	4.17	1.72	2.14	8.20	0.79
2	2	25	A/A	A/A	163	53	19.4674	90	70	37.20	119.00	25.10	320.00	78.50	9.90	0.31	11.70	311.00	4.74	14.80	11.35	13.38	15.20	1.14	3.92	3.70	64.80	4.80	1.05	2.13	12.14	1.98
2	2	22	A/C	A/G	154	54	19.8347	112	70	37.20	129.00	30.90	347.00	89.20	9.50	0.41	11.30	436.00	4.17	12.30	6.40	13.53	15.17	1.12	4.70	4.13	66.04	4.01	1.12	2.68	18.74	0.89
2	2	22	A/C	A/G	158	59	21.6713	90	58	41.70	136.00	29.80	326.00	91.40	10.70	0.24	13.10	227.00	4.56	12.40	4.56	18.20	19.88	1.09	2.80	4.25	67.24	4.57	1.60	2.31	16.57	0.53
2	2	23	A/C	A/G	160	60	22.0386	110	70	40.00	131.00	28.20	328.00	86.20	10.80	0.33	13.70	309.00	4.64	12.60	5.91	20.82	23.77	1.14	4.92	5.38	69.91	4.84	1.00	3.73	5.70	1.93
2	2	18	A/A	A/A	168	54	19.8347	110	72	39.30	124.00	25.10	316.00	79.40	10.80	0.37	13.10	339.00	4.95	18.20	7.41	12.56	23.37	1.86	3.16	4.02	86.99	4.53	1.37	2.28	11.69	1.29
2	2	20	A/A	A/A	157	62	22.7732	102	60	35.50	119.00	28.10	335.00	83.70	9.80	0.35	11.50	355.00	4.24	13.60	9.25	10.95	16.94	1.55	4.36	3.46	71.53	4.58	1.32	1.83	18.05	0.77
1	2	22	A/C	A/G	176	56	20.5693	120	80	50.60	166.00	28.90	328.00	88.20	13.60	0.19	20.40	139.00	5.74	13.20	6.80	20.03	20.76	1.04	2.89	4.16	75.67	5.30	1.02	2.64	14.63	2.52
2	2	21	A/A	A/A	150	58	21.3039	110	72	38.50	124.00	29.40	322.00	91.20	10.30	0.29	12.20	281.00	4.22	12.70	5.27	16.00	17.28	1.08	2.87	6.76	71.69	5.08	1.25	4.86	13.05	0.75
1	2	23	A/A	A/A	175	53	19.4674	114	72	48.60	163.00	29.20	335.00	86.90	11.50	0.22	15.10	188.00	5.59	12.20	6.70	7.17	12.98	1.81	4.10	4.32	80.46	5.03	1.62	2.31	10.69	0.61
2	2	20	A/C	A/G	167	62	22.7732	110	70	38.40	121.00	26.80	315.00	85.00	13.80	0.33	20.20	238.00	4.52	13.60	6.44	15.51	19.74	1.27	4.45	3.84	66.14	5.26	1.68	1.94	7.75	0.65
2	2	20	A/A	A/A	163	57	20.9366	110	70	40.90	132.00	28.80	323.00	89.10	12.50	0.23	19.50	186.00	4.59	13.20	6.49	10.52	13.85	1.32	2.54	3.43	63.18	4.91	1.30	1.88	8.84	0.77
2	2	20	A/C	A/G	169	52	19.1001	110	70	30.40	89.00	19.60	293.00	67.00	10.90	0.29	15.20	268.00	4.54	18.00	6.25	16.40	17.55	1.07	3.30	4.53	71.11	4.67	1.86	2.21	11.66	1.12
2	1	19	A/A	A/A	163	57	20.9366	110	70	35.50	110.00	28.40	310.00	91.70	11.50	0.33	13.70	287.00	3.87	13.90	5.81	10.46	17.32	1.66	4.22	3.21	88.11	4.91	1.47	1.51	8.43	0.71
2	2	21	A/A	A/A	160	60	22.0386	120	74	41.20	132.00	27.80	320.00	86.90	10.20	0.35	12.80	348.00	4.74	13.50	7.02	14.39	18.09	1.26	3.42	3.42	75.13	4.70	1.56	1.58	8.81	0.73
2	2	19	A/C	A/G	168	60	22.0386	108	72	40.20	134.00	29.60	333.00	88.90	9.70	0.38	11.70	391.00	4.52	13.20	9.49	16.38	17.98	1.10	3.65	5.07	70.62	4.97	1.72	2.90	22.09	0.96
2	1	19	A/A	A/A	163	57	20.9366	122	70	40.70	140.00	31.50	344.00	91.70	10.70	0.24	14.10	224.00	4.44	12.60	7.67	9.95	15.27	1.53	4.69	3.63	66.60	4.94	1.06	2.35	19.65	0.58
2	1	20	A/A	A/A	160.5	59.5	21.8549	114	70	42.40	137.00	29.90	323.00	92.60	11.60	0.28	14.20	239.00	4.58	12.60	5.33	38.84	20.27	0.52	3.34	3.75	66.66	5.35	1.67	1.89	9.83	0.55
2	1	19	A/C	A/G	167	53	19.4674	110	70	37.70	120.00	23.50	318.00	73.90	10.30	0.59	13.30	569.00	5.10	18.70	8.93	11.96	16.04	1.34	1.69	3.40	57.87	4.33	1.01	1.77	4.89	2.25
2	2	19	A/A	A/A	158	54	19.8347	90	60	36.00	120.00	27.80	333.00	83.50	10.00	0.36	12.30	364.00	4.31	13.10	8.17	9.84	14.31	1.45	4.44	4.02	70.15	3.93	2.01	1.84	8.63	0.50
2	2	21	A/C	A/G	157	56	20.5693	102	68	37.60	122.00	29.30	324.00	90.40	11.50	0.27	14.70	231.00	4.16	13.50	6.49	16.81	14.68	0.87	3.98	3.01	82.48	5.01	1.24	1.63	8.31	0.53
1	1	19	A/C	A/G	174	53	19.4674	120	82	47.40	163.00	32.30	344.00	93.90	10.50	0.20	13.50	194.00	5.05	13.10	5.31	13.38	19.15	1.43	6.66	3.30	81.15	4.50	1.54	1.54	12.65	0.70
1	1	24	A/A	A/A	166	57	20.9366	120	80	46.70	159.00	30.30	340.00	89.00	10.50	0.28	12.90	268.00	5.25	12.40	5.96	14.30	17.70	1.24	5.24	3.97	92.69	5.06	1.69	1.96	11.90	1.03
2	2	18	A/A	A/A	153	60	22.0386	122	86	37.70	128.00	29.20	340.00	86.10	9.90	0.29	12.30	292.00	4.38	12.50	7.38	34.25	24.01	0.70	5.52	3.39	61.44	4.94	1.29	1.94	4.94	0.52
2	2	20	A/A	A/A	155.5	52	19.1001	120	80	34.50	108.00	24.50	313.00	78.20	13.20	0.32	18.00	243.00	4.41	17.00	6.03	9.74	16.89	1.73	3.43	2.89	60.30	4.59	1.04	1.71	6.11	0.63
2	2	23	A/A	A/A	162.5	60	22.0386	120	78	42.70	140.00	27.20	328.00	83.10	11.40	0.31	15.10	277.00	5.14	13.80	4.90	6.34	14.46	2.28	3.76	4.28	73.62	4.69	1.47	2.52	11.55	0.75
2	2	20	A/A	A/A	157	56	20.5693	124	78	38.10	131.00	30.00	344.00	87.20	11.60	0.35	15.10	306.00	4.37	12.20	7.90	13.36	15.61	1.17	3.85	2.79	62.18	5.16	1.15	1.53	8.93	0.46
2	2	21	A/C	A/G	169	54	19.8347	110	60	42.30	138.00	31.20	326.00	95.50	10.30	0.37	12.50	358.00	4.43	12.90	7.65	10.88	15.71	1.44	4.20	3.89	75.48	4.80	1.40	2.13	12.58	1.03
2	1	19	A/A	A/A	158	51	18.7328	116	80	41.60	136.00	30.40	327.00	93.10	11.10	0.41	13.70	370.00	4.47	13.10	7.97	14.31	15.80	1.10	3.18	4.11	66.94	4.91	1.49	2.36	8.07	0.79
2	2	21	A/C	A/G	167	62	22.7732	110	70	37.00	116.00	24.80	314.00	79.20	11.50	0.28	15.90	242.00	4.67	14.80	6.02	12.03	20.76	1.73	3.50	3.38	75.13	4.68	0.93	2.12	10.81	1.00
2	2	20	A/A	A/A	159	58	21.3039	122	84	38.60	121.00	26.80	313.00	85.60	11.70	0.42	15.70	354.00	4.51	15.20	7.74	12.19	17.95	1.47	3.76	3.48	66.23	4.85	1.47	1.78	13.85	0.60
2	2	21	A/A	A/A	169	60	22.0386	90	60	40.10	131.00	28.50	327.00	87.20	10.20	0.32	13.20	315.00	4.60	12.70	10.42	12.01	15.36	1.28	4.01	4.02	86.98	4.89	1.19	2.57	12.24	0.89
2	2	23	A/A	A/A	168	52	19.1001	100	60	40.60	130.00	26.40	320.00	82.40	10.80	0.36	14.20	333.00	4.93	13.70	8.56	10.56	16.53	1.57	4.54	4.33	75.81	5.53	1.67	2.25	12.05	1.03
1	1	21	A/A	A/A	177	60	22.0386	100	60	48.50	166.00	33.30	342.00	97.40	11.70	0.20	16.60	170.00	4.98	12.20	5.94	18.58	28.69	1.54	3.99	3.78	86.84	5.56	1.27	2.19	13.25	0.86
1	1	23	A/A	A/A	167	62	22.7732	100	60	49.30	166.00	28.90	337.00	85.90	10.20	0.36	12.70	348.00	5.74	13.30	6.13	18.45	18.61	1.01	3.41	3.83	100.41	6.43	1.12	2.25	9.72	1.37
2	2	20	A/A	A/A	164	54	19.8347	90	60	42.00	141.00	30.80	336.00	91.70	9.60	0.21	11.90	222.00	4.58	12.10	8.42	15.17	20.64	1.36	4.17	4.76	74.04	4.82	1.56	2.79	13.21	0.89
1	2	22	A/A	A/A	172	60	22.0386	110	60	34.90	103.00	18.40	295.00	62.30	10.60	0.33	16.60	306.00	5.60	20.60	7.80	31.53	26.44	0.84	4.20	3.60	76.05	5.62	0.98	2.43	11.32	0.62
1	2	22	A/C	A/G	172	62	22.7732	100	60	50.00	170.00	29.80	340.00	87.70	9.60	0.27	11.70	280.00	5.70	13.40	6.30	28.89	38.94	1.35	5.04	3.02	78.35	5.47	0.98	1.81	10.24	0.66
2	1	19	A/A	A/A	168	58	21.3039	90	60	37.60	122.00	31.40	324.00	96.90	10.30	0.22	12.80	212.00	3.88	12.00	5.37	8.75	13.30	1.52	4.00	4.52	53.07	5.29	1.56	2.70	18.95	0.60
2	1	21	A/C	A/G	159	55	20.202	110	60	39.00	124.00	28.40	318.00	89.40	11.20	0.37	13.50	334.00	4.36	13.80	6.70	15.06	20.39	1.35	3.19	3.29	67.83	5.27	1.52	1.62	8.02	0.55
2	2	20	A/C	A/G	166	53	19.4674	90	60	42.30	140.00	28.50	331.00	86.20	10.80	0.27	14.30	253.00	4.91	13.50	6.61	46.83	34.32	0.73	3.56	3.77	74.07	4.67	1.43	2.02	10.51	0.86
2	2	25	A/C	A/G	164	53	19.4674	90	60	40.50	134.00	31.20	331.00	94.20	11.50	0.24	14.70	205.00	4.30	13.10	7.27	12.32	13.19	1.07	4.11	3.58	74.57	5.06	1.30	2.03	10.26	0.52
2	3	22	A/C	A/G	170	53	19.4674	90	60	41.00	136.00	28.60	332.00	86.30	11.20	0.32	14.30	283.00	4.75	13.40	4.56	13.95	16.23	1.16	2.88	4.23	87.89	4.76	1.43	2.45	8.75	0.44
2	2	21	A/C	A/G	163	60	22.0386	90	60	40.20	134.00	28.30	333.00	85.00	11.30	0.33	14.00	289.00	4.73	12.60	9.75	14.24	16.48	1.16	3.45	3.47	65.51	5.66	1.63	1.70	13.70	0.68
2	2	20	A/A	A/A	157	51	18.7328	100	60	37.80	115.00	25.90	304.00	85.10	12.70	0.55	16.80	433.00	4.44	14.90	9.22	9.23	13.85	1.50	4.41	3.71	70.41	4.84	1.31	2.06	6.79	0.95
2	2	22	A/A	A/A	159	53	19.4674	100	60	35.20	112.00	27.90	318.00	87.60	10.90	0.29	14.10	262.00	4.02	13.20	7.19	9.61	15.54	1.62	3.77	3.00	80.76	4.85	1.20	1.60	5.70	0.57
2	2	19	A/C	A/G	164	51	18.7328	110	70	39.90	128.00	27.00	321.00	84.20	10.70	0.21	15.00	198.00	4.74	13.60	3.71	9.86	43.75	4.44	3.17	4.52	73.53	5.32	2.11	2.18	18.01	0.49
2	2	20	A/C	A/G	160	59	21.6713	110	60	38.50	127.00	27.00	330.00	81.70	10.70	0.33	14.20	306.00	4.71	13.40	8.11	16.10	17.98	1.12	3.73	3.18	70.60	5.49	1.31	1.63	5.57	0.88
2	1	21	A/C	A/G	170	60	22.0386	100	60	43.60	140.00	29.40	321.00	91.60	9.80	0.31	12.40	313.00	4.76	14.10	7.01	18.41	13.41	0.73	4.90	5.29	75.31	5.17	1.95	3.00	16.11	0.73
2	1	20	A/C	A/G	164	57	20.9366	100	60	42.20	136.00	29.40	322.00	91.30	11.80	0.28	15.80	234.00	4.62	13.20	6.09	11.17	16.60	1.49	4.02	5.09	75.17	5.24	1.63	3.04	12.01	0.82
2	2	19	A/C	A/G	165	55	20.202	100	60	38.20	124.00	29.50	325.00	90.70	10.90	0.38	13.80	347.00	4.21	12.60	5.52	10.33	14.89	1.44	5.16	4.03	71.84	4.92	2.02	1.71	10.58	0.44
2	2	20	A/A	A/A	164	54	19.8347	90	60	38.40	129.00	31.70	336.00	94.30	11.30	0.44	15.60	386.00	4.07	12.50	8.73	14.96	13.95	0.93	4.48	4.60	68.76	4.32	1.30	2.96	21.09	0.87
2	1	18	A/C	A/G	167	54	19.8347	120	60	38.60	125.00	29.10	324.00	90.00	12.00	0.40	15.00	337.00	4.29	14.20	9.23	13.40	17.98	1.34	4.23	4.71	76.32	4.37	2.15	2.20	24.09	0.94
1	2	21	A/C	A/G	172	62	22.7732	110	70	46.50	159.00	30.30	342.00	88.60	10.40	0.33	13.20	318.00	5.25	12.30	7.74	14.89	19.18	1.29	3.72	5.76	93.67	4.98	1.80	3.59	16.26	1.12
2	2	23	A/A	A/A	165	58	21.3039	90	60	42.00	137.00	29.50	326.00	90.30	11.20	0.35	13.60	314.00	4.65	13.00	7.74	18.70	17.84	0.95	3.59	4.15	65.02	5.28	1.86	2.09	10.09	0.48
2	2	21	A/A	A/A	166.5	56	20.5693	90	60	38.60	124.00	28.60	321.00	89.10	11.10	0.26	13.70	234.00	4.33	13.50	4.87	20.04	18.51	0.92	2.33	3.55	60.91	5.70	1.65	1.73	5.77	0.50
1	2	21	A/A	A/A	168	58	21.3039	90	60	43.30	150.00	29.80	346.00	85.90	10.30	0.25	12.70	243.00	5.04	12.80	4.40	12.22	14.76	1.21	5.16	2.95	83.22	5.57	0.87	1.86	19.03	0.87
2	2	19	A/C	A/G	168	58	21.3039	100	60	39.70	130.00	30.70	327.00	93.60	9.30	0.25	10.70	264.00	4.24	12.30	5.82	10.25	13.57	1.32	3.45	3.50	66.08	5.42	1.54	1.72	32.85	0.83
2	1	20	A/A	A/A	159	55	20.202	110	60	37.80	127.00	30.80	336.00	91.50	11.20	0.26	14.50	231.00	4.13	12.20	4.64	8.80	19.35	2.20	2.51	4.10	68.23	5.30	1.55	2.20	11.07	1.01
2	1	20	A/A	A/A	157	51	18.7328	90	60	38.40	128.00	30.60	333.00	91.90	12.40	0.25	16.70	203.00	4.18	11.70	5.09	14.45	18.57	1.29	3.73	3.20	72.10	4.96	1.24	1.74	8.04	0.50
2	2	20	A/A	A/A	165	54	19.8347	90	60	37.80	128.00	29.30	339.00	86.50	12.60	0.24	19.50	190.00	4.37	13.30	9.42	31.73	23.67	0.75	3.75	3.62	75.88	5.09	1.27	2.00	9.55	0.54
2	1	21	A/A	A/A	167	52	19.1001	110	70	44.00	144.00	30.60	327.00	93.60	9.60	0.18	11.80	187.00	4.70	13.20	5.87	12.02	15.20	1.26	2.60	5.45	68.81	5.34	1.47	3.39	10.09	0.22
2	1	20	A/C	A/G	157.5	53	19.4674	100	60	40.50	136.00	31.30	336.00	93.10	10.90	0.31	14.20	289.00	4.35	12.00	5.61	16.86	17.45	1.03	3.96	3.91	69.22	4.65	1.16	2.34	15.44	1.12
2	2	22	A/A	A/A	160	56	20.5693	100	60	42.70	139.00	30.20	326.00	92.80	10.20	0.32	13.10	315.00	4.60	12.70	4.76	13.56	22.70	1.67	4.50	4.18	73.40	4.75	1.87	1.96	12.59	0.69
2	1	18	A/C	A/G	156	52	19.1001	110	70	40.80	132.00	29.30	324.00	90.70	10.60	0.34	13.10	318.00	4.50	13.00	6.58	19.75	21.79	1.10	3.68	3.64	74.63	4.95	1.55	1.95	11.76	0.48
2	2	18	A/A	A/A	168	62	22.7732	100	70	40.70	134.00	29.90	329.00	90.80	10.60	0.33	13.60	314.00	4.48	12.20	8.24	13.16	15.75	1.20	3.23	3.86	77.51	5.17	1.21	2.34	13.84	1.01
2	1	20	A/A	A/A	165	53	19.4674	100	70	41.60	137.00	29.70	329.00	90.20	12.50	0.30	17.50	238.00	4.61	12.80	6.36	13.59	16.34	1.20	4.30	3.22	70.76	4.90	1.35	1.68	10.23	0.57
1	1	19	C/C	G/G	176	54	19.8347	130	60	47.80	159.00	29.10	333.00	87.50	9.20	0.34	11.20	365.00	5.46	12.80	9.88	23.88	23.13	0.97	5.07	3.73	93.27	5.33	1.22	2.24	15.95	0.69
1	1	19	A/A	A/A	170	57	20.9366	110	60	49.80	170.00	30.50	341.00	89.40	10.00	0.31	12.20	314.00	5.57	11.90	5.23	17.77	20.15	1.13	4.58	3.83	97.85	5.10	1.59	1.89	43.98	0.89
1	2	20	A/A	A/A	176	57	20.9366	120	70	45.90	153.00	28.50	333.00	85.50	11.40	0.31	15.40	273.00	5.37	13.30	5.61	21.12	16.70	0.79	4.87	3.31	86.67	5.53	1.16	1.93	15.99	0.43
1	2	21	A/A	A/A	171	62	22.7732	100	60	44.10	137.00	30.10	311.00	96.90	11.50	0.29	15.40	252.00	4.55	11.90	6.66	14.44	13.30	0.92	4.95	3.53	74.98	5.24	1.41	1.78	22.43	0.53
2	1	20	A/A	A/A	168	60	22.0386	90	60	33.60	102.00	23.60	304.00	77.80	11.60	0.31	14.90	264.00	4.32	17.30	6.16	14.08	15.47	1.10	4.10	3.15	62.38	4.70	1.50	1.49	11.81	0.37
1	1	19	A/A	A/A	167	62	22.7732	100	60	45.70	153.00	29.30	335.00	87.50	11.70	0.31	15.10	269.00	5.22	12.90	6.05	29.65	25.26	0.85	4.04	4.40	89.41	5.48	1.74	2.28	18.49	0.69
2	1	19	A/A	A/A	160	55	20.202	90	60	41.10	132.00	28.00	321.00	87.30	11.50	0.34	14.30	293.00	4.71	13.90	10.69	11.04	13.40	1.21	3.62	4.58	77.36	5.50	1.48	2.70	16.50	0.94
2	1	19	A/C	A/G	170	61	22.4059	120	70	44.70	147.00	29.30	329.00	89.20	11.50	0.43	15.40	375.00	5.01	13.10	6.38	12.11	16.35	1.35	2.09	6.40	86.01	5.42	1.64	3.90	10.56	2.17
1	2	21	A/A	A/A	179	62	22.7732	110	70	43.90	141.00	28.70	321.00	89.20	11.60	0.41	14.80	353.00	4.92	13.50	6.77	22.21	25.04	1.13	6.01	3.62	90.82	5.27	1.16	2.22	12.58	0.57
2	2	19	A/A	A/A	160	55	20.202	90	60	39.50	129.00	31.20	327.00	95.60	10.90	0.30	13.60	272.00	4.13	13.30	7.70	14.66	15.45	1.05	3.46	2.87	56.10	5.01	1.04	1.65	8.22	0.59
2	2	20	A/A	A/A	168	52	19.1001	90	60	38.80	130.00	29.40	335.00	87.80	11.20	0.26	14.20	231.00	4.42	12.90	6.31	13.03	16.02	1.23	5.80	3.14	73.97	5.09	1.36	1.56	10.61	0.52
2	2	19	A/A	A/A	156	54	19.8347	90	60	41.20	136.00	29.40	330.00	89.00	10.80	0.35	13.50	326.00	4.63	12.80	6.17	20.39	18.24	0.89	4.22	5.25	80.49	5.28	1.82	3.02	21.78	0.59
2	1	20	A/A	A/A	162	55	20.202	110	60	42.20	137.00	29.50	325.00	90.80	11.10	0.37	14.40	331.00	4.65	13.00	6.88	14.39	15.55	1.08	3.89	4.56	75.40	4.99	1.70	2.50	35.05	0.91
1	2	22	A/A	A/A	178	59	21.6713	90	60	42.60	144.00	29.00	338.00	85.90	10.90	0.20	14.40	184.00	4.96	12.80	4.51	12.62	17.65	1.40	3.78	3.89	70.99	5.30	1.41	2.16	11.14	0.48
2	1	20	A/A	A/A	164	52	19.1001	90	60	39.70	128.00	30.00	322.00	93.20	12.10	0.28	15.80	233.00	4.26	13.10	4.99	12.38	18.00	1.45	3.15	3.09	78.13	5.78	1.20	1.69	14.18	0.97
1	1	20	A/A	A/A	170	59	21.6713	90	60	45.80	153.00	31.70	334.00	95.00	9.40	0.24	11.10	253.00	4.82	12.70	6.32	12.58	15.72	1.25	4.87	4.02	92.10	4.94	1.32	2.39	12.79	1.33
2	2	20	A/C	A/G	160	51	18.7328	100	60	34.90	109.00	23.60	312.00	75.50	10.80	0.27	15.40	247.00	4.62	14.70	5.99	29.06	16.81	0.58	5.11	4.11	70.51	4.47	1.55	2.25	5.57	0.60
2	1	19	A/A	A/A	158	60	22.0386	90	60	40.20	132.00	28.70	328.00	87.40	11.50	0.25	15.60	217.00	4.60	13.20	4.37	16.74	19.18	1.15	3.05	3.61	68.43	5.01	1.29	2.10	6.73	0.74
2	1	20	A/A	A/A	163	52	19.1001	120	60	40.60	134.00	28.80	330.00	87.10	11.70	0.27	15.90	232.00	4.66	13.10	7.25	12.91	17.23	1.33	4.02	4.01	79.43	5.26	1.76	2.01	12.71	0.43
2	2	20	A/C	A/G	161	56	20.5693	90	60	40.10	132.00	27.60	329.00	83.90	10.50	0.30	13.20	284.00	4.78	13.70	6.31	20.18	18.62	0.92	3.94	4.73	75.69	5.03	1.62	2.86	6.73	0.57
2	1	20	A/A	A/A	162	54	19.8347	90	60	42.00	138.00	30.30	329.00	92.10	9.20	0.29	11.20	317.00	4.56	12.30	6.83	17.85	15.55	0.87	4.55	5.08	78.56	5.51	1.87	2.81	12.47	0.79
2	1	19	A/A	A/A	162	62	22.7732	100	60	40.80	134.00	30.20	328.00	91.90	10.30	0.35	12.80	339.00	4.44	12.30	7.83	9.03	9.50	1.05	2.91	3.86	58.11	5.37	1.32	2.22	7.84	1.02
2	3	20	A/C	A/G	168	56	20.5693	100	60	41.60	132.00	27.80	317.00	87.60	10.80	0.40	13.60	368.00	4.75	14.20	6.66	15.60	14.99	0.96	3.05	4.32	67.90	5.65	1.66	2.36	15.12	0.70
1	2	20	A/A	A/A	170	57	20.9366	100	60	49.30	170.00	28.40	345.00	82.40	10.20	0.28	13.50	272.00	5.98	13.00	6.66	14.41	19.60	1.36	3.96	3.84	102.82	5.42	1.22	2.38	13.20	1.31
2	1	18	A/A	A/A	165	62	22.7732	110	60	43.80	149.00	31.00	340.00	91.10	10.70	0.22	13.90	207.00	4.81	12.30	5.06	41.55	27.89	0.67	3.47	3.33	86.98	4.85	1.36	1.83	16.96	0.55
2	1	20	A/C	A/G	165	62	22.7732	90	60	39.70	130.00	30.70	327.00	93.90	10.30	0.33	12.40	325.00	4.23	12.30	6.61	14.24	17.50	1.23	4.76	3.53	76.13	5.44	1.12	2.15	8.96	1.17
1	2	20	A/C	A/G	173	55	20.202	120	80	47.60	157.00	27.90	330.00	84.50	11.40	0.29	14.60	252.00	5.63	13.10	6.80	11.18	13.40	1.20	4.76	3.61	90.89	4.86	1.36	2.16	10.88	0.85
2	2	21	A/C	A/G	163	57	20.9366	100	60	37.30	123.00	29.60	330.00	89.70	11.00	0.37	13.80	333.00	4.16	12.80	8.51	16.62	18.04	1.09	4.60	3.40	83.64	5.49	1.48	1.65	5.50	0.77
2	2	19	A/A	A/A	164	58	21.3039	100	60	36.10	112.00	23.10	310.00	74.60	9.30	0.33	10.40	361.00	4.84	17.80	9.91	13.17	14.93	1.13	3.75	3.50	85.55	5.13	1.24	1.99	7.45	1.04
2	1	21	A/A	A/A	170	52	19.1001	100	60	40.10	132.00	30.40	329.00	92.40	11.50	0.30	15.30	257.00	4.34	12.90	4.41	15.62	20.72	1.33	3.89	4.21	82.69	5.31	1.77	2.23	30.11	0.73
2	2	21	A/C	A/G	170	55	20.202	100	60	35.30	108.00	21.80	306.00	71.30	10.40	0.31	13.30	301.00	4.95	17.20	6.45	7.29	16.56	2.27	3.26	4.31	74.28	5.31	1.34	2.50	8.81	1.03
2	1	20	A/A	A/A	166	53	19.4674	90	60	41.70	140.00	29.80	336.00	88.70	11.50	0.30	16.30	260.00	4.70	12.70	7.39	10.38	15.68	1.51	3.86	4.81	72.17	4.89	1.59	2.85	12.83	0.99
2	1	20	A/C	A/G	167	52	19.1001	90	60	41.40	134.00	28.60	324.00	88.30	11.60	0.24	14.20	211.00	4.69	14.30	7.01	19.02	21.31	1.12	3.70	3.78	79.27	4.97	1.90	1.74	21.94	0.82
2	2	21	A/A	A/A	160	53	19.4674	100	60	34.20	98.00	20.50	287.00	71.40	9.90	0.59	11.80	600.00	4.79	16.80	6.36	11.82	19.01	1.61	3.51	4.34	78.24	4.82	1.56	2.51	7.71	0.61
2	2	20	A/C	A/G	167	53	19.4674	100	60	39.60	131.00	29.80	331.00	90.20	10.00	0.34	12.30	336.00	4.39	12.10	7.39	11.93	15.17	1.27	3.84	4.15	68.50	4.68	1.80	2.12	17.99	0.76
2	2	20	A/C	A/G	170	57	20.9366	110	60	38.40	129.00	29.20	336.00	86.90	10.80	0.33	14.20	307.00	4.42	13.20	8.33	14.83	13.10	0.88	4.55	4.84	71.27	5.78	1.15	3.33	7.18	1.02
1	1	19	C/C	A/G	176	58	21.3039	90	60	49.20	161.00	29.60	327.00	90.40	12.20	0.28	16.90	227.00	5.44	13.40	6.56	9.70	16.89	1.74	3.71	3.97	102.31	4.73	1.58	2.07	13.67	0.66
1	1	21	A/A	A/A	171	54	19.8347	110	60	48.70	162.00	29.80	333.00	89.50	10.70	0.30	13.90	284.00	5.44	12.70	6.02	16.23	19.21	1.18	4.58	3.73	94.48	5.10	1.71	1.79	25.08	0.83
1	1	21	A/A	A/A	175	62	22.7732	110	60	50.50	171.00	30.60	339.00	90.30	10.40	0.30	13.10	286.00	5.59	12.70	5.84	15.14	18.68	1.23	4.29	4.05	93.94	4.92	1.62	2.17	19.42	0.65
1	2	21	A/A	A/A	178	56	20.5693	100	60	46.20	155.00	31.80	335.00	94.70	11.70	0.22	15.20	186.00	4.88	12.80	5.82	8.62	13.57	1.57	3.48	3.13	88.83	5.08	1.45	1.47	14.95	0.69
2	1	21	A/A	A/A	162	52	19.1001	100	60	42.50	141.00	29.00	332.00	87.40	10.50	0.30	12.90	289.00	4.86	12.70	7.19	16.53	16.08	0.97	4.58	3.51	72.72	5.66	1.46	1.81	12.13	0.77
2	1	20	A/A	A/A	168	60	22.0386	100	60	42.20	138.00	29.10	327.00	88.80	11.10	0.28	14.70	251.00	4.75	12.20	9.56	11.17	16.77	1.50	3.59	4.32	74.39	5.87	1.49	2.47	10.18	1.10
2	2	20	A/C	A/G	168	55	20.202	90	60	40.10	130.00	29.40	324.00	90.70	12.00	0.31	15.80	260.00	4.42	12.90	7.22	16.29	18.31	1.12	3.80	3.68	57.41	4.49	2.03	1.45	13.98	0.45
1	1	19	A/C	A/G	167	55	20.202	110	60	45.50	150.00	31.00	330.00	94.00	11.80	0.23	16.60	195.00	4.84	12.00	6.27	65.74	55.35	0.84	4.93	4.27	67.50	4.66	1.38	2.51	10.82	1.46
2	1	20	A/C	A/G	162	62	22.7732	100	60	35.80	112.00	26.50	313.00	84.60	10.70	0.39	13.00	367.00	4.23	14.00	5.74	13.35	13.69	1.03	4.25	3.58	55.01	5.00	1.11	2.16	10.88	1.22
2	2	20	A/A	A/A	162	56	20.5693	90	60	38.20	123.00	29.70	322.00	92.30	11.10	0.39	15.10	347.00	4.14	12.80	9.11	10.50	12.23	1.16	3.54	3.98	55.31	4.83	1.25	2.39	9.00	0.64
2	2	19	A/A	A/A	157	51	18.7328	100	60	39.10	126.00	29.90	322.00	92.90	11.60	0.37	15.40	316.00	4.21	14.10	7.22	11.87	14.13	1.19	4.73	3.47	66.50	4.30	1.29	1.89	9.84	0.79
2	1	20	A/C	A/G	172	56	20.5693	100	60	41.00	135.00	29.80	329.00	90.50	11.40	0.26	14.50	228.00	4.53	13.90	5.40	13.06	18.39	1.41	3.88	4.01	68.19	4.62	1.92	1.87	15.29	0.39
1	2	21	A/C	A/G	176	61	22.4059	100	60	45.50	155.00	31.20	341.00	91.50	11.50	0.29	16.10	254.00	4.97	12.40	5.96	19.23	23.42	1.22	5.48	3.64	80.03	5.00	1.16	2.13	13.11	0.60
2	2	22	A/A	A/A	168	54	19.8347	100	60	40.70	132.00	28.10	324.00	86.60	11.50	0.35	15.20	302.00	4.70	13.10	7.48	15.87	16.93	1.07	4.31	4.09	84.96	5.06	1.31	2.44	6.17	0.60
2	1	21	A/C	A/G	178	57	20.9366	90	60	45.30	149.00	31.30	329.00	95.20	10.20	0.26	12.50	255.00	4.76	12.30	6.32	11.71	17.01	1.45	4.33	4.27	72.55	4.86	1.79	2.24	14.73	0.72
2	1	20	A/A	A/A	162	56	20.5693	100	60	38.20	121.00	28.10	317.00	88.60	10.50	0.31	12.70	296.00	4.31	14.50	5.56	9.98	16.89	1.69	3.82	3.20	66.56	5.12	1.46	1.56	8.48	0.68
1	1	21	A/A	A/A	170	61	22.4059	100	60	49.10	161.00	30.10	328.00	91.90	12.30	0.25	17.50	200.00	5.34	12.60	4.68	45.76	27.01	0.59	4.64	3.87	96.06	5.43	1.22	2.35	19.49	0.92
2	2	20	A/C	A/G	163	55	20.202	90	60	38.90	131.00	30.30	337.00	89.80	11.80	0.32	15.60	268.00	4.33	12.20	6.91	19.36	15.10	0.78	4.58	4.34	76.08	4.59	1.51	2.36	10.33	1.12
2	3	19	A/C	A/G	160	62	22.7732	100	60	34.00	101.00	22.30	297.00	75.20	9.90	0.46	11.80	462.00	4.52	15.70	6.63	18.97	16.42	0.87	4.23	3.57	65.67	4.67	0.93	2.26	4.67	0.81
2	1	19	A/C	A/G	164	56	20.5693	100	60	39.10	127.00	31.10	325.00	95.80	12.20	0.26	17.10	210.00	4.08	12.30	8.66	16.88	18.37	1.09	5.30	4.25	66.92	4.73	1.74	2.19	10.64	1.06
2	3	19	A/A	A/A	173	55	20.202	90	60	39.90	130.00	28.40	326.00	87.30	12.60	0.29	18.30	230.00	4.57	12.40	8.09	14.37	16.50	1.15	3.73	4.26	73.15	4.40	1.79	2.19	10.32	0.43
2	1	19	A/C	A/G	156	56	20.5693	120	70	42.60	138.00	26.60	324.00	82.10	12.10	0.36	15.90	297.00	5.19	14.00	8.00	11.40	15.54	1.36	4.22	3.46	73.65	5.10	1.08	2.12	24.94	0.93
1	2	20	A/C	A/G	181	60	22.0386	88	60	48.10	157.00	29.00	326.00	88.70	12.80	0.24	19.60	189.00	5.42	13.10	4.30	19.87	26.02	1.31	5.45	3.80	89.51	4.70	1.56	1.95	11.10	0.90
1	1	21	A/A	A/A	176	55	20.202	90	60	45.40	156.00	29.40	344.00	85.70	11.00	0.24	13.60	224.00	5.30	12.60	5.29	18.19	19.92	1.10	3.54	4.12	77.26	5.06	1.53	2.30	12.85	0.58
2	3	21	A/C	A/G	167	58	21.3039	90	60	40.60	134.00	30.70	330.00	92.90	11.70	0.34	15.90	288.00	4.37	12.50	5.91	16.70	15.07	0.90	3.99	3.62	59.24	5.10	1.33	2.03	14.07	0.47
2	1	22	A/A	A/A	157	60	22.0386	100	60	41.90	140.00	29.40	334.00	87.80	9.70	0.29	12.10	303.00	4.77	12.00	6.76	14.71	16.28	1.11	3.34	3.30	73.04	4.98	1.05	1.95	9.15	0.92
2	1	19	A/A	A/A	167	58	21.3039	110	70	42.10	135.00	29.80	321.00	92.90	11.90	0.39	16.30	327.00	4.53	12.20	7.71	18.66	21.37	1.15	3.79	3.32	71.13	4.82	1.14	1.88	15.25	1.33
2	1	19	A/C	G/G	160	60	22.0386	110	70	39.10	130.00	29.00	332.00	87.10	9.50	0.27	11.60	288.00	4.49	12.90	4.82	11.95	18.33	1.53	4.31	3.51	64.21	5.21	1.38	1.96	7.98	0.63
2	1	21	A/A	A/A	163	53	19.4674	120	70	40.20	129.00	28.60	321.00	89.10	12.50	0.23	16.10	182.00	4.51	12.80	5.47	11.54	16.81	1.46	4.75	3.99	75.82	5.41	1.65	2.06	15.11	0.67
2	1	20	A/C	G/G	160	53	19.4674	90	60	39.10	127.00	30.20	325.00	92.90	12.00	0.23	17.20	193.00	4.21	11.90	5.46	18.98	19.17	1.01	3.73	3.80	65.72	5.20	1.71	1.82	11.72	0.65
2	1	19	A/A	A/A	171	62	22.7732	100	60	43.70	146.00	31.30	334.00	93.60	10.10	0.31	12.20	306.00	4.67	11.60	5.70	14.45	17.54	1.21	3.80	4.89	78.83	4.89	1.72	2.92	13.44	0.72
2	1	21	A/A	A/A	162	54	19.8347	100	60	39.30	125.00	29.60	318.00	93.10	10.20	0.41	12.50	402.00	4.22	12.80	6.01	10.22	13.75	1.35	3.10	3.66	58.59	4.75	1.21	2.21	6.84	0.66
2	1	20	A/C	A/G	162	51	18.7328	100	60	38.30	130.00	30.40	339.00	89.70	9.30	0.31	11.00	337.00	4.27	12.40	9.46	24.07	24.54	1.02	5.38	4.80	53.85	5.16	1.17	3.25	7.41	1.05
2	3	20	A/A	A/A	162	52	19.1001	110	60	31.60	87.00	16.60	275.00	60.30	9.80	0.58	11.50	592.00	5.24	19.80	4.28	13.91	19.97	1.44	6.28	3.65	57.32	4.41	1.47	2.04	13.53	0.34
2	1	21	A/C	A/G	166	55	20.202	90	60	39.20	125.00	29.60	319.00	92.90	10.00	0.37	11.80	372.00	4.22	12.40	6.22	17.46	19.55	1.12	4.45	4.33	62.40	4.85	1.65	2.42	17.98	0.50
2	2	21	A/C	A/G	158	57	20.9366	90	60	35.10	109.00	24.30	311.00	78.20	10.40	0.30	13.20	287.00	4.49	14.50	5.03	11.56	16.48	1.43	3.32	3.39	71.97	4.73	1.47	1.74	11.04	0.61
2	2	21	A/C	A/G	156	53	19.4674	100	60	39.70	128.00	26.70	322.00	82.70	9.70	0.41	12.30	420.00	4.80	14.40	8.02	19.03	16.07	0.84	3.61	3.26	61.08	5.23	1.53	1.40	10.49	0.81
2	2	21	A/A	A/A	164	62	22.7732	100	60	37.50	123.00	26.80	328.00	81.70	10.80	0.43	14.00	399.00	4.59	13.50	6.45	16.28	15.53	0.95	4.61	3.32	64.65	4.89	1.24	1.87	7.16	0.49
2	2	20	A/C	A/G	160	51	18.7328	110	60	32.70	103.00	24.30	315.00	77.30	10.50	0.36	12.60	343.00	4.23	14.90	4.71	21.85	20.36	0.93	9.74	3.89	64.69	4.65	1.54	2.10	11.94	0.51
2	2	21	A/A	A/A	164	57	20.9366	100	60	42.00	137.00	28.50	326.00	87.30	12.70	0.28	18.10	217.00	4.81	13.70	6.89	10.99	16.75	1.52	4.01	4.17	64.22	5.18	1.71	2.16	14.21	0.85
2	2	21	A/C	A/G	166	53	19.4674	90	60	39.70	127.00	30.60	320.00	95.70	10.20	0.36	12.30	357.00	4.15	13.00	7.04	9.26	14.88	1.61	4.07	3.23	68.23	4.83	1.46	1.54	12.92	0.40
2	1	21	A/A	A/A	168	54	19.8347	90	60	41.60	136.00	31.40	327.00	96.10	9.60	0.22	11.50	227.00	4.33	12.00	4.40	16.02	15.49	0.97	2.92	3.55	70.63	5.07	1.45	1.86	17.52	0.73
2	2	21	A/A	A/A	164	53	19.4674	100	60	33.40	106.00	26.60	317.00	83.90	11.60	0.33	15.20	284.00	3.98	12.30	5.85	13.90	14.07	1.01	5.34	3.37	69.11	5.03	1.26	1.95	13.49	0.72
1	1	21	A/A	A/A	171	58	21.3039	100	60	48.90	164.00	29.50	335.00	88.10	11.10	0.25	15.10	229.00	5.55	12.50	5.60	14.52	16.66	1.15	3.62	3.92	85.81	4.99	1.17	2.45	19.63	1.10
2	1	19	A/A	A/A	161	57	20.9366	100	60	40.20	134.00	30.80	333.00	92.40	11.00	0.28	14.30	256.00	4.35	12.50	7.63	44.23	30.10	0.68	6.67	4.66	76.19	5.26	1.79	2.57	7.22	0.52
2	2	20	A/C	A/G	164	53	19.4674	90	60	40.90	136.00	32.30	333.00	97.10	11.60	0.28	14.80	239.00	4.21	11.70	4.89	28.59	24.92	0.87	4.08	5.10	75.17	4.92	1.73	2.86	20.75	0.72
2	1	20	A/C	A/G	165	53	19.4674	120	60	41.10	132.00	30.40	321.00	94.70	13.10	0.27	18.50	206.00	4.34	12.90	5.36	14.66	16.14	1.10	4.27	5.84	76.39	4.75	1.60	3.73	20.89	1.04
2	1	20	A/C	A/G	162	52	19.1001	90	60	41.30	135.00	28.60	327.00	87.50	13.30.	0.11	15.40	85.00	4.72	12.70	6.41	16.30	16.80	1.03	4.41	3.88	80.52	4.12	1.85	1.70	18.69	0.49
2	1	19	A/C	A/G	165	51	18.7328	110	70	40.80	133.00	29.60	326.00	90.90	11.90	0.19	15.00	162.00	4.49	12.20	3.50	11.79	18.91	1.60	4.53	3.52	64.47	4.94	1.51	1.94	27.06	0.44
2	2	21	A/C	A/G	157	56	20.5693	120	70	39.30	132.00	31.40	336.00	93.30	11.00	0.30	14.00	275.00	4.21	12.00	5.42	9.89	15.21	1.54	4.11	3.40	63.59	5.27	1.63	1.58	12.90	0.47
2	2	20	A/C	A/G	159	54	19.8347	110	60	39.30	130.00	30.70	331.00	92.70	13.30	0.23	22.10	170.00	4.24	13.00	7.89	13.48	15.18	1.13	4.92	3.74	68.59	4.61	1.50	2.04	13.31	0.52
2	1	20	A/A	A/A	161	56	20.5693	100	60	40.90	139.00	32.00	340.00	94.20	10.30	0.27	12.20	257.00	4.34	12.20	6.96	12.61	13.51	1.07	3.82	3.42	57.30	4.36	1.47	1.73	11.67	0.66
2	2	21	A/C	A/G	157	57	20.9366	100	60	36.90	116.00	28.00	314.00	88.90	10.10	0.34	11.90	332.00	4.15	12.50	6.38	9.95	12.35	1.24	6.18	3.72	71.84	4.80	1.72	1.72	19.77	0.45
2	2	19	A/C	A/G	158	51	18.7328	90	60	40.90	133.00	28.10	325.00	86.30	10.10	0.34	12.90	337.00	4.74	13.60	8.14	11.97	16.68	1.39	4.57	4.48	68.12	4.67	1.35	2.72	14.23	1.02
2	1	21	A/A	A/A	160	54	19.8347	90	60	42.60	144.00	29.60	338.00	87.50	10.20	0.31	12.40	308.00	4.87	12.40	6.87	23.56	17.65	0.75	3.54	4.17	65.12	4.87	1.13	2.47	5.81	1.63
2	1	21	A/A	A/A	172	62	22.7732	100	60	40.60	132.00	28.90	325.00	89.00	11.70	0.23	16.10	196.00	4.56	14.30	6.60	13.62	16.22	1.19	5.15	3.83	80.16	5.41	1.76	1.77	6.08	0.82
2	2	20	A/A	A/A	157	52	19.1001	110	70	38.70	127.00	30.20	328.00	92.10	12.10	0.37	16.60	302.00	4.20	13.80	5.43	13.13	17.95	1.37	3.86	3.90	72.92	5.09	1.58	2.03	6.42	0.64
2	1	23	A/A	A/A	160	55	20.202	110	60	39.70	130.00	29.00	327.00	88.40	10.20	0.25	12.00	246.00	4.49	14.20	3.77	11.44	12.56	1.10	4.99	4.51	67.13	5.00	2.15	2.03	14.24	0.53
2	1	21	A/A	A/A	155	55	20.202	90	60	40.70	136.00	30.20	334.00	90.20	9.70	0.32	11.70	331.00	4.51	12.30	5.64	11.30	14.61	1.29	5.83	4.36	60.40	5.19	1.47	2.54	8.06	1.06
2	2	20	A/C	A/G	161	52	19.1001	110	60	44.50	153.00	30.40	344.00	88.50	12.90	0.31	17.70	242.00	5.03	14.60	10.10	23.99	13.08	0.55	3.81	5.43	74.50	5.34	1.73	3.21	12.69	1.10
2	2	21	A/C	A/G	158	55	20.202	100	60	41.90	131.00	29.10	313.00	93.10	10.40	0.28	13.00	272.00	4.50	14.80	5.73	9.49	12.49	1.32	4.24	4.37	70.91	4.83	1.19	2.75	12.27	1.10
2	1	18	A/A	A/A	163	52	19.1001	90	60	43.90	141.00	29.60	321.00	92.00	11.00	0.35	14.20	319.00	4.77	13.10	9.48	16.95	16.59	0.98	4.15	5.18	72.71	4.80	2.02	2.77	15.10	0.85
2	2	21	A/C	A/G	158	61	22.4059	110	60	41.20	131.00	26.80	318.00	84.30	11.00	0.41	14.50	371.00	4.89	13.00	10.11	16.14	20.59	1.28	3.58	2.66	62.20	5.25	0.88	1.50	13.54	0.90
2	2	19	A/C	A/G	170	59	21.6713	110	60	36.50	118.00	31.10	323.00	96.30	10.40	0.41	12.60	393.00	3.79	15.40	9.82	14.03	12.02	0.86	6.11	3.15	76.19	4.97	1.13	1.73	5.87	2.17
2	1	25	A/A	A/A	158	54	19.8347	90	60	40.30	129.00	29.20	320.00	91.20	11.60	0.29	15.50	247.00	4.42	12.70	6.97	14.74	19.47	1.32	4.26	3.89	62.40	4.87	1.71	1.93	11.89	0.61
2	2	20	A/C	A/G	160	52	19.1001	120	80	40.40	133.00	31.50	329.00	95.70	10.30	0.37	12.70	354.00	4.22	13.60	6.00	24.06	21.44	0.89	4.68	4.31	72.42	4.75	1.67	2.43	9.85	0.51
1	1	19	A/C	A/G	175	58	21.3039	90	60	49.10	162.00	29.70	330.00	89.90	9.40	0.23	11.80	251.00	5.46	12.40	8.06	12.59	14.86	1.18	6.00	4.41	92.07	5.39	1.35	2.72	20.64	1.05
2	1	20	A/A	A/A	170	56	20.5693	120	70	42.60	140.00	29.90	329.00	90.80	9.70	0.35	12.10	360.00	4.69	12.50	6.23	14.34	15.70	1.09	3.11	3.98	66.89	5.01	1.28	2.35	34.48	1.49
1	1	19	A/A	A/A	175	55	20.202	120	60	44.50	156.00	30.40	351.00	86.70	10.50	0.31	13.80	297.00	5.13	12.50	7.78	11.74	16.00	1.36	5.69	3.97	98.50	5.40	1.28	2.43	13.96	0.97
2	1	20	A/A	A/A	162	57	20.9366	95	70	41.10	133.00	29.30	324.00	90.50	9.50	0.36	11.70	374.00	4.54	12.90	8.36	9.55	14.98	1.57	4.09	4.56	67.70	5.49	1.48	2.80	11.03	1.13
1	2	19	A/C	A/G	191	62	22.7732	120	80	45.60	154.00	30.40	338.00	90.10	9.80	0.23	11.90	233.00	5.06	13.30	7.29	14.10	17.43	1.24	4.81	3.92	102.66	4.99	1.90	1.91	17.36	0.50
2	2	20	A/C	A/G	162	60	22.0386	110	60	41.20	141.00	28.80	342.00	84.30	11.30	0.25	15.20	220.00	4.89	13.50	7.21	16.75	15.21	0.91	4.06	3.19	80.23	5.02	1.33	1.78	9.67	0.58
2	1	22	A/C	A/G	167	57	20.9366	100	60	40.90	138.00	29.90	337.00	88.70	10.30	0.27	13.00	261.00	4.61	12.90	8.27	13.10	14.22	1.09	3.86	3.99	65.80	5.03	1.62	2.02	12.76	0.51
2	1	23	A/C	A/G	163	53	19.4674	90	60	40.10	129.00	30.50	322.00	94.80	10.30	0.22	12.70	217.00	4.23	12.80	6.53	13.09	15.23	1.16	3.01	4.87	66.49	5.39	1.44	3.07	10.85	1.20
1	1	20	A/C	A/G	176	60	22.0386	90	60	50.90	172.00	31.80	338.00	94.10	11.80	0.23	16.30	190.00	5.41	12.30	6.62	12.57	17.08	1.36	5.84	3.30	98.88	5.21	1.33	1.65	19.63	1.47
2	2	21	A/C	A/G	160	52	19.1001	90	60	39.30	132.00	30.80	336.00	91.60	10.40	0.33	13.10	316.00	4.29	12.10	6.99	23.54	20.55	0.87	5.24	3.26	78.26	4.81	1.33	1.69	11.72	0.88
2	1	19	A/C	A/G	160	60	22.0386	120	80	43.40	142.00	29.00	327.00	88.80	9.80	0.33	11.90	337.00	4.89	12.90	9.75	13.27	14.47	1.09	4.36	5.25	83.70	5.89	2.08	2.72	8.13	0.68
1	1	23	C/C	G/G	177	62	22.7732	110	70	47.20	154.00	30.40	326.00	93.30	12.10	0.29	17.10	237.00	5.06	12.30	8.50	18.99	20.06	1.06	3.63	4.68	82.94	5.45	1.73	2.60	18.25	1.03
1	1	19	C/C	G/G	172	52	19.1001	110	60	50.10	163.00	29.60	325.00	91.10	10.60	0.25	13.20	232.00	5.50	13.80	8.04	15.40	23.24	1.51	4.20	4.15	79.61	4.95	1.83	2.12	15.14	0.75
2	5	20	A/C	A/G	151	51.3	18.843	100	70	40.00	138.00	29.00	345.00	84.00	11.00	0.27	13.80	243.00	4.76	12.70	8.98	14.77	16.37	1.11	4.30	4.47	74.59	4.81	1.55	2.58	11.17	0.80
1	2	21	A/A	A/A	168	60	22.0386	100	60	47.20	157.00	28.20	333.00	84.70	9.90	0.37	12.90	368.00	5.57	12.80	7.29	15.09	21.87	1.45	5.78	4.09	96.79	5.20	1.33	2.44	17.28	0.74
2	2	20	A/C	A/G	162	57	20.9366	90	60	39.70	132.00	29.10	332.00	87.40	10.60	0.31	13.40	295.00	4.54	12.30	6.14	9.28	15.23	1.64	2.74	3.13	69.97	5.26	1.08	1.75	15.78	0.96
2	2	21	A/C	A/G	168	55	20.202	100	60	37.00	118.00	26.60	319.00	83.50	11.10	0.34	14.10	302.00	4.43	14.60	4.22	10.32	14.87	1.44	4.86	4.01	73.71	5.59	1.63	2.21	11.04	0.50
2	2	20	A/C	A/G	158	52	19.1001	100	60	33.60	102.00	24.00	304.00	79.10	11.60	0.44	15.50	378.00	4.25	16.30	5.97	16.33	16.30	1.00	2.90	3.50	78.27	4.95	1.67	1.59	11.57	0.50
2	1	19	A/C	A/G	162	54	19.8347	110	70	43.10	143.00	27.40	332.00	82.70	12.60	0.25	19.40	198.00	5.21	15.90	6.41	30.58	24.87	0.81	5.14	3.35	74.22	4.72	1.20	1.92	8.58	0.53
2	1	19	A/C	A/G	162	52	19.1001	110	60	41.90	139.00	31.70	332.00	95.70	10.40	0.37	12.70	361.00	4.38	11.90	5.43	10.53	14.02	1.33	7.54	3.90	77.71	5.18	1.32	2.27	9.04	0.84
2	1	19	A/C	A/G	160	58	21.3039	100	60	40.80	140.00	31.00	343.00	90.30	10.90	0.24	13.80	223.00	4.52	12.30	5.50	20.67	16.37	0.79	3.21	3.16	61.34	4.59	1.57	1.41	22.75	0.39
2	1	19	A/C	A/G	164	54	19.8347	120	80	38.50	124.00	28.60	322.00	88.90	10.40	0.26	12.60	254.00	4.33	13.00	4.39	18.55	23.07	1.24	3.98	4.00	74.55	5.46	1.91	1.90	8.41	0.36
1	1	19	A/A	A/A	172	57	20.9366	100	60	45.80	156.00	32.60	341.00	95.60	11.00	0.36	14.20	331.00	4.79	12.20	6.81	12.82	18.51	1.44	3.95	3.38	91.74	4.59	1.64	1.50	20.42	0.76
1	1	20	A/A	A/A	171	55	20.202	100	60	44.70	148.00	32.30	331.00	97.60	11.00	0.33	14.40	296.00	4.58	12.20	6.58	22.20	17.63	0.79	3.91	3.74	69.19	4.93	1.65	1.89	16.01	0.74
1	2	20	A/C	A/G	176	56	20.5693	90	60	46.60	161.00	30.70	345.00	88.80	10.50	0.29	13.50	276.00	5.25	13.10	5.65	12.31	15.14	1.23	3.28	4.18	95.03	4.99	1.36	2.50	18.36	0.84
1	1	21	A/C	A/G	177	60	22.0386	110	70	48.70	161.00	29.10	331.00	87.90	10.80	0.28	14.10	259.00	5.54	12.90	5.74	15.72	15.43	0.98	6.76	3.35	92.75	5.36	1.05	2.02	11.77	1.45
2	2	23	A/C	G/G	155	53.5	19.6511	100	60	32.60	99.00	20.20	304.00	66.50	8.70	0.40	10.30	457.00	4.90	18.10	6.90	14.12	14.20	1.01	3.73	3.41	77.97	5.24	1.11	2.08	7.77	0.66
1	1	22	A/C	A/G	163	52.5	19.2837	120	60	49.60	172.00	29.40	347.00	84.80	9.40	0.28	11.20	293.00	5.85	12.20	5.25	13.13	16.92	1.29	4.65	4.00	92.51	4.38	1.18	2.39	19.63	1.11
1	1	21	A/C	A/G	161	56	20.5693	110	60	46.40	155.00	29.20	334.00	87.50	10.40	0.27	12.70	260.00	5.30	13.10	9.67	15.52	16.22	1.05	3.63	3.09	80.04	5.02	1.15	1.70	7.36	0.63
1	2	22	C/C	G/G	173	62	22.7732	110	70	43.80	145.00	29.10	331.00	88.00	9.50	0.36	11.90	382.00	4.98	13.10	6.98	14.37	14.85	1.03	8.31	3.47	83.69	5.09	1.20	1.93	9.01	0.90
1	1	21	A/A	A/A	163	56	20.5693	110	68	45.60	159.00	27.60	349.00	79.00	9.70	0.33	11.60	340.00	5.77	12.60	9.55	12.80	19.24	1.50	4.19	4.42	84.81	5.29	1.48	2.46	7.43	1.16
1	1	21	A/C	A/G	179	62.42	22.9275	118	70	48.40	166.00	30.90	343.00	90.00	9.10	0.29	10.90	316.00	5.38	12.70	8.01	42.84	50.81	1.19	4.79	4.07	90.10	5.27	2.21	1.50	18.96	1.10
2	1	21	A/C	G/G	162	54.5	20.0184	90	60	37.00	124.00	30.50	335.00	90.90	12.00	0.27	16.50	225.00	4.07	11.60	5.81	25.26	24.50	0.97	4.51	3.70	65.64	5.41	1.67	1.75	9.46	0.88
1	1	20	A/A	A/A	176	56	20.5693	120	70	49.10	171.00	30.30	348.00	86.90	9.50	0.25	11.90	258.00	5.65	11.90	4.28	17.96	18.26	1.02	4.54	3.31	98.64	5.76	1.65	1.49	25.50	0.62
1	1	23	A/C	A/G	162	51.6	18.9532	120	84	44.70	150.00	30.20	336.00	90.10	11.80	0.26	16.00	221.00	4.96	13.50	9.57	33.91	23.75	0.70	3.77	3.32	70.99	4.94	1.16	1.96	7.64	0.93
2	3	22	C/C	A/G	168	56.5	20.753	100	60	34.50	107.00	24.80	310.00	79.90	12.30	0.33	15.70	266.00	4.32	13.80	8.48	26.62	19.15	0.72	3.92	3.29	65.26	5.03	1.26	1.84	6.63	0.56
1	1	21	A/A	A/A	175	59	21.6713	120	70	46.60	153.00	29.20	328.00	88.90	10.30	0.28	12.60	274.00	5.24	12.90	5.56	15.93	17.18	1.08	4.11	4.39	82.70	5.09	1.42	2.58	12.60	1.11
1	2	22	A/C	A/G	178	60	22.0386	100	60	46.60	163.00	30.60	350.00	87.40	11.10	0.31	14.90	282.00	5.33	12.10	8.34	35.94	27.47	0.76	5.94	3.15	85.06	5.47	1.24	1.61	12.64	1.17
1	3	24	A/C	A/G	177	61	22.4059	114	70	44.70	150.00	29.50	336.00	88.00	11.10	0.27	14.70	246.00	5.08	12.00	6.59	15.30	18.48	1.21	5.19	3.51	72.28	5.21	1.57	1.65	16.62	1.12
1	2	24	A/A	A/A	173	62	22.7732	100	60	49.60	168.00	29.80	339.00	88.10	10.50	0.18	13.60	175.00	5.63	12.40	4.42	21.90	22.59	1.03	3.82	2.70	88.22	4.94	1.11	1.45	24.91	0.77
1	1	24	A/C	A/G	182	59	21.6713	130	80	49.40	168.00	29.80	340.00	87.60	13.40	0.24	17.80	180.00	5.64	12.60	5.44	19.38	27.63	1.43	6.19	4.02	94.50	5.23	1.80	1.85	8.10	0.80
1	2	22	A/C	A/G	174	57.5	21.1203	110	70	47.40	161.00	29.70	340.00	87.30	11.70	0.40	15.10	339.00	5.43	12.60	10.65	25.42	22.56	0.89	5.34	3.69	80.20	4.77	1.39	1.94	10.51	1.81
1	1	22	A/A	A/A	170	60	22.0386	114	70	50.90	176.00	29.30	346.00	84.80	11.50	0.28	15.40	247.00	6.00	12.40	5.19	17.96	19.50	1.09	3.48	3.53	85.02	4.61	1.21	1.89	14.57	1.22
1	1	22	C/C	G/G	170	57	20.9366	100	60	47.80	156.00	30.80	326.00	94.30	10.40	0.32	12.70	306.00	5.07	13.00	9.62	14.22	11.76	0.83	5.93	4.04	97.21	5.32	1.39	2.24	10.12	1.25
1	1	21	A/A	A/A	179	57	20.9366	100	60	47.20	158.00	31.50	335.00	94.00	11.30	0.06	13.40	52.00	5.02	12.50	4.38	11.65	14.79	1.27	3.29	3.28	80.03	4.63	1.49	1.62	35.71	0.86
1	1	22	A/C	A/G	176	60	22.0386	120	60	52.20	171.00	29.80	328.00	90.90	11.90	0.32	16.50	268.00	5.74	13.20	7.90	20.93	19.86	0.95	3.57	2.76	97.98	5.57	1.25	1.40	23.03	0.55
1	1	20	A/A	A/A	171	56.2	20.6428	126	80	47.60	159.00	28.80	334.00	86.10	11.50	0.29	15.00	254.00	5.53	12.60	7.09	14.50	15.58	1.07	4.77	3.36	100.83	5.20	1.12	1.85	13.64	1.47
1	1	21	A/C	A/G	165	55	20.202	114	70	40.30	140.00	33.80	347.00	97.30	9.90	0.20	11.40	204.00	4.14	13.50	5.66	51.23	24.96	0.49	4.25	4.44	76.40	4.55	1.10	2.84	13.01	1.62
1	1	21	A/A	A/A	172	62	22.7732	130	70	47.20	159.00	30.20	337.00	89.70	10.50	0.30	13.00	286.00	5.26	12.90	6.01	17.22	20.72	1.20	4.23	3.73	92.90	4.94	1.41	2.09	14.22	0.71
1	1	21	A/A	A/A	174	54.4	19.9816	130	80	47.30	162.00	28.80	342.00	84.00	9.40	0.25	11.20	262.00	5.63	12.90	5.96	30.43	27.69	0.91	3.88	3.90	90.03	4.28	1.08	2.54	13.02	1.04
1	1	22	A/A	A/A	173	61.5	22.5895	120	70	43.40	147.00	30.10	339.00	88.90	10.40	0.30	13.20	292.00	4.88	12.00	4.73	19.88	24.54	1.23	5.87	5.12	97.60	5.00	1.55	3.12	12.60	0.60
1	1	20	A/C	A/G	175	55	20.202	120	80	49.60	174.00	31.50	351.00	89.90	12.30	0.22	17.90	178.00	5.52	12.20	5.74	57.25	21.36	0.37	3.10	5.10	77.78	5.83	1.76	2.82	22.08	0.99
1	1	21	C/C	G/G	170	51	18.7328	114	70	50.90	178.00	29.60	350.00	84.70	10.10	0.24	12.60	234.00	6.01	12.70	5.35	19.54	18.09	0.93	4.10	4.10	93.01	4.70	1.36	2.52	18.46	0.94
1	1	21	A/A	A/A	170	57	20.9366	104	70	48.10	163.00	30.10	339.00	88.70	10.60	0.27	13.40	250.00	5.42	12.50	4.89	12.11	16.36	1.35	4.60	3.46	90.85	4.67	1.49	1.72	15.17	0.54
1	1	21	A/A	A/A	173	61.6	22.6263	90	60	46.60	153.00	29.30	328.00	89.10	9.80	0.33	11.00	336.00	5.23	13.30	5.14	12.44	18.65	1.50	5.82	3.75	93.55	4.67	1.33	2.16	11.97	0.89
1	1	23	A/A	A/A	173	58	21.3039	118	70	48.80	165.00	33.40	338.00	98.80	10.90	0.22	13.50	207.00	4.94	12.00	5.24	36.02	29.02	0.81	4.31	3.89	94.10	4.76	1.42	2.20	23.02	0.69
1	2	21	A/C	A/G	176	60	22.0386	90	60	48.50	168.00	28.60	346.00	82.50	13.60	0.30	20.40	219.00	5.88	13.20	6.06	12.92	15.97	1.24	5.87	3.68	95.20	5.22	1.09	2.37	8.31	0.70
1	2	22	A/C	A/G	165	58	21.3039	110	68	41.80	144.00	28.30	344.00	82.10	11.00	0.32	14.50	290.00	5.09	13.00	7.37	10.10	14.19	1.40	5.02	3.03	70.41	4.78	1.19	1.61	9.24	0.60
1	1	21	A/A	A/A	168	52	19.1001	100	60	46.80	156.00	24.40	333.00	73.10	10.00	0.30	12.80	300.00	6.40	13.80	7.83	194.34	57.56	0.30	4.39	4.66	72.71	5.00	1.18	2.97	15.44	1.54
1	1	21	A/A	A/A	165	55	20.202	120	60	44.10	137.00	20.70	311.00	66.70	12.20	0.29	18.50	237.00	6.61	17.90	7.01	16.19	17.40	1.07	5.38	3.32	84.32	5.86	1.08	1.92	10.34	1.25
1	2	23	A/C	A/G	175	60	22.0386	120	60	44.40	149.00	28.80	336.00	85.90	10.10	0.26	12.80	259.00	5.17	13.60	6.36	16.74	18.07	1.08	8.81	3.73	72.21	5.05	1.38	2.05	35.88	0.66
1	1	22	A/C	A/G	173	61	22.4059	120	80	45.10	151.00	29.90	335.00	89.30	9.90	0.28	11.70	280.00	5.05	12.30	7.66	12.65	15.27	1.21	4.56	3.74	74.65	5.27	1.45	1.95	8.74	0.90
1	2	22	A/C	A/G	173	62	22.7732	100	60	46.40	161.00	30.50	347.00	87.90	12.00	0.28	16.20	234.00	5.28	12.10	6.05	14.70	17.08	1.16	5.67	4.86	91.84	5.28	1.66	2.70	13.58	0.49
2	2	22	C/C	A/G	158	62	22.7732	100	60	41.10	132.00	27.80	321.00	86.70	13.00	0.32	19.30	249.00	4.74	14.00	9.57	7.83	19.98	2.55	3.00	2.99	56.84	5.56	1.31	1.56	9.90	0.60
1	2	25	A/A	A/A	175	62	22.7732	120	70	48.00	160.00	28.90	333.00	86.80	9.70	0.21	11.70	214.00	5.53	12.40	5.56	26.50	24.87	0.94	6.19	4.31	79.80	5.56	1.60	2.45	10.18	0.90
2	2	24	C/C	A/G	160	52	19.1001	100	60	39.90	131.00	29.00	328.00	88.30	10.60	0.31	12.70	293.00	4.52	13.60	7.12	21.46	17.91	0.83	3.90	3.41	56.04	4.89	1.07	2.17	10.73	0.79
1	1	21	A/A	A/A	169	54	19.8347	110	60	47.40	160.00	28.80	338.00	85.30	10.30	0.28	12.60	273.00	5.56	12.60	5.23	70.66	39.20	0.55	4.69	4.55	82.69	6.08	1.36	2.69	19.28	0.80
1	1	21	C/C	G/G	175	62	22.7732	100	70	46.30	154.00	31.30	333.00	94.10	10.70	0.24	13.50	228.00	4.92	12.60	3.93	12.45	14.93	1.20	4.04	4.10	83.47	5.11	1.91	1.82	20.70	0.85
1	1	21	A/C	A/G	175	60	22.0386	110	70	49.90	169.00	29.60	339.00	87.50	10.10	0.28	12.50	273.00	5.70	13.20	5.97	17.84	15.78	0.88	4.78	3.37	83.06	5.12	0.98	2.03	23.13	0.67
1	2	21	A/A	A/A	173	58	21.3039	100	60	49.40	166.00	29.10	336.00	86.50	10.80	0.35	13.70	325.00	5.71	13.00	9.85	15.71	15.59	0.99	4.65	4.90	75.90	5.41	1.14	3.32	38.59	0.83
1	1	21	A/A	A/A	175	60	22.0386	90	60	49.50	164.00	31.80	331.00	96.10	11.50	0.23	14.90	197.00	5.15	13.20	4.67	37.99	25.13	0.66	6.09	3.70	76.05	5.54	0.96	2.35	17.62	1.41
1	1	21	A/C	A/G	169	62	22.7732	120	80	42.80	135.00	25.90	315.00	82.00	11.60	0.25	15.80	218.00	5.22	13.90	6.69	29.44	22.43	0.76	3.83	4.11	81.10	5.58	0.97	2.71	8.64	0.80
1	2	23	A/C	A/G	170	62	22.7732	90	60	46.00	150.00	28.50	326.00	87.30	11.10	0.30	13.80	265.00	5.27	12.80	6.64	15.75	17.23	1.09	4.71	3.10	78.62	5.32	1.54	1.38	23.95	0.44
1	1	21	A/A	A/A	162	52	19.1001	108	70	52.20	175.00	30.90	335.00	92.10	12.00	0.27	17.60	222.00	5.67	13.80	5.43	23.63	23.52	1.00	6.90	4.27	89.15	5.63	1.27	2.66	10.14	1.18
1	1	21	A/A	A/A	170	61	22.4059	100	60	48.50	164.00	30.90	338.00	91.30	10.90	0.23	14.30	211.00	5.31	12.10	6.81	21.81	23.38	1.07	6.39	4.15	92.10	5.69	1.16	2.72	16.87	1.01
1	1	21	A/A	A/A	179	62	22.7732	108	70	47.90	171.00	32.60	357.00	91.40	11.50	0.26	14.30	224.00	5.24	12.00	4.22	22.87	17.62	0.77	4.83	3.38	79.25	5.93	1.69	1.49	24.57	0.51
1	1	20	A/A	A/A	169	55	20.202	110	60	45.00	155.00	30.50	344.00	88.60	10.50	0.25	13.40	241.00	5.08	12.60	6.20	23.19	19.89	0.86	4.95	3.44	72.87	5.58	1.21	1.96	14.24	0.66
1	1	23	A/A	A/A	161	52	19.1001	120	70	45.40	154.00	31.00	339.00	91.50	8.90	0.18	10.40	197.00	4.96	11.90	4.03	13.43	18.48	1.38	3.94	3.40	89.01	4.66	1.46	1.63	12.92	0.52
1	2	24	C/C	G/G	172	62	22.7732	120	80	44.70	148.00	29.70	331.00	89.60	10.90	0.26	14.20	238.00	4.99	13.40	5.07	23.75	26.15	1.10	3.86	3.51	81.48	4.81	1.58	1.81	16.79	0.68
1	2	21	C/C	G/G	170	60	22.0386	110	70	48.00	161.00	30.30	335.00	90.20	11.20	0.25	14.40	221.00	5.32	12.50	8.47	14.48	14.09	0.97	6.16	4.33	62.98	5.19	1.08	2.87	6.01	0.93
1	1	23	A/C	G/G	165	55	20.202	120	70	47.40	159.00	30.40	335.00	90.60	11.30	0.28	14.70	248.00	5.23	11.90	7.03	27.11	18.53	0.68	4.48	3.47	97.93	5.03	1.22	1.84	17.58	1.19
1	1	17	A/A	A/A	166	60	22.0386	120	80	45.20	156.00	30.40	345.00	88.10	10.80	0.23	14.60	211.00	5.13	11.70	7.07	27.44	22.17	0.81	4.82	3.98	97.20	5.14	0.96	2.54	13.46	1.57
1	2	25	A/A	A/A	170	60	22.0386	120	70	45.30	152.00	28.60	336.00	85.30	10.00	0.26	12.20	257.00	5.31	13.90	6.71	19.92	19.20	0.96	5.85	3.72	86.43	4.55	1.15	2.23	17.88	1.03
1	1	21	A/C	A/G	174	52	19.1001	100	60	49.60	168.00	30.80	339.00	90.80	10.80	0.24	13.30	219.00	5.46	12.70	5.93	10.29	13.68	1.33	4.26	4.36	80.62	4.96	1.54	2.30	16.26	1.07
1	2	22	A/C	A/G	157	55	20.202	110	64	44.30	150.00	28.70	339.00	84.90	10.80	0.28	14.10	259.00	5.22	12.90	6.03	12.14	17.21	1.42	5.62	5.07	119.34	4.78	1.67	2.95	25.73	0.82
1	2	24	A/C	A/G	170	56	20.5693	120	70	45.50	157.00	29.60	345.00	85.80	12.10	0.25	16.50	208.00	5.30	12.80	5.47	10.46	17.25	1.65	6.36	4.05	75.28	4.83	1.40	2.23	11.45	0.56
1	2	22	A/C	A/G	168	59	21.6713	120	70	45.00	150.00	28.20	333.00	84.70	10.40	0.36	12.40	343.00	5.31	14.10	7.74	20.02	19.07	0.95	5.07	4.66	86.68	5.10	0.93	3.19	13.68	0.87
1	2	22	C/C	G/G	177	55	20.202	120	70	44.70	146.00	28.30	327.00	86.60	11.60	0.26	15.40	221.00	5.16	13.30	10.02	15.46	19.87	1.29	5.83	4.43	69.31	4.62	1.21	2.83	9.45	0.83
1	2	21	A/C	A/G	175	58	21.3039	120	70	45.10	151.00	29.60	335.00	88.40	11.60	0.20	14.20	174.00	5.10	13.50	5.65	17.73	23.26	1.31	3.82	3.40	69.26	4.98	1.09	2.08	10.46	0.71
1	1	19	A/C	A/G	165	55	20.202	100	70	46.90	156.00	28.30	333.00	85.00	10.50	0.28	13.10	267.00	5.52	13.10	4.79	18.27	21.38	1.17	4.80	4.00	72.34	5.26	1.52	2.37	11.08	1.18
1	2	21	A/A	A/A	170	55	20.202	110	70	46.10	155.00	27.70	336.00	82.50	12.30	0.23	17.30	183.00	5.59	13.60	5.49	11.20	13.18	1.18	4.20	3.27	73.98	4.72	1.30	1.64	9.35	1.03
1	2	23	A/A	A/A	168	59	21.6713	120	80	45.40	152.00	30.40	335.00	90.80	9.70	0.22	11.50	226.00	5.00	12.70	5.60	21.53	26.58	1.23	4.25	3.81	69.39	4.68	1.11	2.34	16.60	1.29
1	2	22	A/A	A/A	174	60	22.0386	120	80	48.80	163.00	28.30	334.00	84.70	11.00	0.25	14.50	225.00	5.76	12.80	6.66	25.72	18.87	0.73	5.65	3.88	79.20	4.67	1.18	2.25	14.71	1.25
1	2	23	A/C	A/G	173	58	21.3039	100	60	43.30	150.00	28.20	346.00	81.50	9.70	0.31	12.30	323.00	5.31	12.70	8.21	25.23	13.05	0.52	5.47	4.09	74.75	4.85	1.08	2.50	20.30	1.27
1	1	18	A/A	A/A	175	62	22.7732	110	60	48.00	166.00	31.80	346.00	92.00	11.00	0.23	13.90	207.00	5.22	11.20	5.86	18.36	16.58	0.90	4.36	4.07	78.47	5.48	1.29	2.36	19.97	0.78
1	1	20	A/C	A/G	171	52	19.1001	100	60	47.00	162.00	31.70	345.00	92.00	10.70	0.24	14.20	225.00	5.11	12.30	5.27	21.90	19.39	0.89	5.48	5.54	78.89	5.13	2.77	2.10	14.21	1.54
1	1	19	A/A	A/A	164	56	20.5693	100	70	47.90	169.00	29.30	353.00	83.20	11.30	0.29	14.10	258.00	5.76	12.70	7.16	81.21	38.10	0.47	4.79	5.01	91.82	5.13	0.94	3.48	19.25	2.13
1	3	22	C/C	G/G	173	55	20.202	130	70	48.00	165.00	29.50	344.00	85.90	10.10	0.33	12.90	323.00	5.59	12.60	5.13	14.23	18.95	1.33	3.94	3.56	65.20	4.82	1.56	1.61	28.45	0.94
1	2	21	A/C	A/G	166	55	20.202	110	60	44.60	151.00	28.60	339.00	84.50	12.20	0.27	17.80	217.00	5.28	13.40	7.83	9.73	15.14	1.56	6.28	3.68	77.51	5.08	1.03	2.15	12.64	0.79
1	1	22	A/A	A/A	165	56	20.5693	100	70	47.70	166.00	29.10	348.00	83.50	11.20	0.31	14.30	282.00	5.71	12.60	6.59	14.93	16.81	1.13	4.48	3.42	88.65	4.67	1.30	1.76	22.90	0.57
1	1	21	A/A	A/A	178	57	20.9366	100	60	47.70	163.00	30.80	342.00	90.00	10.40	0.28	12.90	269.00	5.30	12.30	4.61	22.20	18.69	0.84	4.39	4.10	71.80	5.06	1.77	1.91	21.65	0.61
1	2	19	A/A	A/A	164	55	20.202	120	60	46.00	155.00	28.80	337.00	85.50	9.60	0.23	11.80	244.00	5.38	12.80	4.84	11.94	13.18	1.10	4.71	3.41	77.12	5.10	1.00	2.01	18.90	0.60
1	2	20	A/C	A/G	168	55	20.202	90	60	44.70	146.00	28.50	327.00	87.30	10.70	0.33	13.60	309.00	5.12	13.30	5.12	16.77	16.78	1.00	2.56	3.63	73.00	4.90	1.09	2.12	20.46	0.68
1	2	22	A/C	A/G	178	58	21.3039	110	70	44.30	144.00	29.60	325.00	91.20	9.70	0.26	11.40	265.00	4.86	12.80	8.30	10.89	19.13	1.76	5.33	3.63	77.33	4.81	1.34	2.01	9.12	0.64
1	2	20	A/A	A/A	170	57	20.9366	120	70	48.60	156.00	28.70	321.00	89.50	10.60	0.25	14.20	238.00	5.43	13.10	9.45	15.14	15.10	1.00	5.41	3.80	75.13	5.04	1.35	2.09	13.60	0.84
1	1	20	A/A	A/A	185	60	22.0386	114	70	46.40	151.00	30.90	325.00	94.90	11.00	0.25	15.00	223.00	4.89	11.90	7.90	8.61	13.66	1.59	3.71	3.68	79.55	5.66	1.24	2.11	15.70	0.82
1	2	20	A/A	A/A	177	61	22.4059	130	80	47.30	161.00	29.80	340.00	87.40	9.30	0.25	11.00	265.00	5.41	13.80	8.44	14.18	16.83	1.19	4.32	4.08	91.11	4.00	1.23	2.50	17.61	0.74
1	1	19	C/C	G/G	177	53	19.4674	114	70	41.30	138.00	29.70	334.00	89.00	10.40	0.34	13.30	330.00	4.64	12.40	7.63	10.13	15.78	1.56	6.65	3.83	80.92	5.64	1.32	2.14	8.00	0.98
1	1	19	A/C	A/G	163	57	20.9366	128	70	49.70	170.00	30.60	342.00	89.40	11.30	0.27	15.00	236.00	5.56	12.20	7.12	11.64	15.22	1.31	4.41	3.87	78.05	5.05	1.14	2.39	14.10	1.23
1	1	21	A/C	A/G	178.5	60	22.0386	120	80	47.80	164.00	30.40	343.00	88.70	11.80	0.20	15.80	170.00	5.39	12.60	9.59	16.63	18.36	1.10	6.46	3.49	76.05	5.43	1.03	2.10	12.46	1.12
1	2	19	A/C	A/G	175.5	59	21.6713	130	80	45.00	150.00	27.80	333.00	83.50	9.60	0.38	11.70	395.00	5.39	14.40	8.37	11.45	18.90	1.65	3.89	4.54	68.83	4.70	1.53	2.61	10.88	0.71
1	1	21	A/C	A/G	171	60	22.0386	121	81	46.70	159.00	30.50	340.00	89.60	10.70	0.24	13.60	224.00	5.21	12.40	7.43	20.93	16.90	0.81	4.82	3.42	85.42	5.02	1.25	1.82	16.46	1.11
1	2	21	A/C	A/G	175	60	22.0386	110	70	47.40	158.00	30.60	333.00	91.70	12.00	0.25	16.00	211.00	5.17	12.60	6.67	19.65	17.78	0.90	3.98	3.92	86.14	4.71	1.93	1.66	18.49	0.78
1	2	21	A/A	A/A	169	61	22.4059	120	80	49.90	168.00	29.60	337.00	87.90	9.30	0.20	11.60	211.00	5.68	13.80	6.65	23.10	18.70	0.81	5.14	4.13	83.25	4.61	1.59	2.27	12.58	0.97
1	1	20	A/A	A/A	168	62	22.7732	130	80	45.60	152.00	30.80	333.00	92.30	13.70	0.22	20.60	160.00	4.94	12.10	7.18	13.34	14.04	1.05	6.17	3.77	93.31	5.26	1.25	2.13	16.57	1.17
1	1	20	A/C	A/G	166	60	22.0386	130	80	50.80	166.00	30.60	327.00	93.60	9.50	0.25	11.40	267.00	5.43	13.80	6.81	39.17	21.88	0.56	6.88	4.63	80.17	4.76	1.17	3.13	19.45	0.72
1	1	20	C/C	G/G	172	56	20.5693	120	80	48.00	160.00	30.70	333.00	92.00	10.90	0.31	14.60	282.00	5.22	12.80	5.72	15.00	16.19	1.08	5.15	3.26	104.51	4.73	1.42	1.54	17.22	0.86
1	2	18	A/A	A/A	168	53	19.4674	100	60	46.20	155.00	29.80	335.00	88.80	10.20	0.31	13.10	303.00	5.20	13.40	6.91	8.78	13.31	1.52	4.50	3.55	70.37	5.26	0.87	2.34	12.44	1.16
1	2	19	A/C	A/G	170	57	20.9366	130	80	48.60	161.00	28.80	331.00	86.90	11.30	0.24	14.30	215.00	5.59	12.30	6.26	13.45	16.50	1.23	3.24	3.06	62.11	4.65	1.15	1.62	16.93	0.80
1	1	20	A/C	A/G	168	60	22.0386	110	70	44.40	148.00	29.10	333.00	87.40	9.80	0.30	11.80	305.00	5.08	13.20	11.89	16.04	21.15	1.32	6.28	3.32	119.45	5.47	1.24	1.73	5.99	0.94
1	1	20	A/A	A/A	154.5	61	22.4059	120	80	43.30	138.00	28.00	319.00	88.00	10.80	0.35	12.80	322.00	4.92	15.40	6.08	19.24	14.46	0.75	3.61	4.27	58.36	4.84	1.84	1.98	8.42	0.91
1	1	19	A/C	A/G	174	52.5	19.2837	110	70	47.20	160.00	28.90	339.00	85.20	10.50	0.26	14.30	244.00	5.54	12.50	4.74	13.65	17.68	1.30	5.66	3.55	67.00	4.92	1.46	1.78	21.92	0.63
1	2	23	A/A	A/A	178	61	22.4059	120	70	49.30	161.00	28.90	327.00	88.50	11.90	0.29	16.40	246.00	5.57	13.20	8.28	16.22	15.85	0.98	4.53	4.83	86.38	5.16	1.58	2.83	20.06	0.91
1	2	22	A/A	A/A	177	60	22.0386	110	74	48.60	167.00	31.70	344.00	92.20	12.20	0.22	17.30	182.00	5.27	11.30	5.60	30.40	24.77	0.81	3.21	4.08	88.48	4.52	1.68	1.96	22.23	1.32
1	1	19	C/C	G/G	183	60	22.0386	110	70	48.30	162.00	30.20	335.00	89.90	9.60	0.27	11.60	280.00	5.37	13.40	7.46	13.36	13.42	1.00	5.19	3.10	78.28	4.88	1.12	1.68	11.97	0.61
1	1	20	A/A	A/A	173	56	20.5693	120	70	47.80	162.00	29.20	339.00	86.30	11.80	0.28	16.20	240.00	5.54	12.70	8.63	15.36	17.60	1.15	4.58	3.86	88.76	5.37	1.14	2.43	10.60	0.82
1	1	21	A/C	A/G	177	54	19.8347	122	70	46.20	151.00	30.00	327.00	91.70	10.30	0.29	12.60	279.00	5.04	12.50	6.03	9.73	12.77	1.31	4.18	3.51	81.34	4.47	1.38	1.82	14.57	0.64
1	1	20	A/A	A/A	167	59	21.6713	120	70	45.60	154.00	30.10	338.00	89.20	12.00	0.26	15.90	216.00	5.11	12.40	5.49	20.47	31.44	1.54	4.85	4.07	73.70	4.11	1.19	2.54	12.33	0.79
1	2	20	A/A	A/A	179	61	22.4059	130	84	43.80	150.00	30.00	342.00	87.60	10.90	0.28	13.90	256.00	5.00	12.80	4.48	12.66	15.38	1.21	4.92	4.02	73.10	4.56	1.44	2.13	13.89	0.71
1	1	19	A/C	A/G	170	62	22.7732	124	70	48.20	163.00	31.00	338.00	91.60	11.00	0.26	14.50	238.00	5.26	12.70	6.42	14.24	17.37	1.22	5.40	4.07	69.38	5.30	1.12	2.68	20.70	0.77
1	1	20	A/C	A/G	181	62	22.7732	110	70	46.50	151.00	27.90	325.00	85.80	11.70	0.26	14.60	220.00	5.42	13.10	5.62	14.94	16.92	1.13	6.70	3.88	70.71	4.97	1.68	1.94	22.03	0.66
1	2	20	C/C	G/G	173	55	20.202	120	80	47.10	153.00	29.50	325.00	90.90	12.50	0.27	17.00	215.00	5.18	13.00	4.87	15.06	17.04	1.13	3.88	3.66	63.94	4.31	1.46	1.93	11.19	0.66
1	1	21	A/A	A/A	175	55	20.202	110	70	46.00	154.00	29.60	335.00	88.30	11.90	0.29	16.10	244.00	5.21	12.90	6.27	11.56	15.57	1.35	4.08	3.98	82.46	6.08	1.27	2.41	9.69	0.81
1	2	21	A/C	A/G	174	57	20.9366	120	70	44.80	150.00	30.20	335.00	90.30	9.60	0.38	11.40	400.00	4.96	13.20	6.06	11.53	17.13	1.49	5.48	3.24	82.50	4.62	1.00	2.06	11.48	0.41
1	1	20	A/C	A/G	166	60	22.0386	130	70	47.00	152.00	31.90	323.00	98.70	11.40	0.30	15.10	266.00	4.76	11.60	5.91	23.17	19.47	0.84	4.24	3.26	66.91	4.49	1.35	1.61	25.23	0.65
1	1	19	A/A	A/A	176	55	20.202	120	80	47.90	160.00	31.50	334.00	94.30	10.10	0.33	12.10	330.00	5.08	12.60	6.09	15.81	19.93	1.26	3.32	4.01	87.77	4.54	1.37	2.28	16.92	0.66
1	2	24	A/A	A/A	170.5	58	21.3039	120	70	47.30	158.00	29.40	334.00	88.10	11.40	0.30	15.00	266.00	5.37	13.60	7.08	15.06	17.69	1.17	4.48	3.85	71.30	4.70	1.79	1.65	35.65	0.61
1	1	20	A/C	A/G	175	62	22.7732	120	80	48.20	162.00	28.60	336.00	85.00	12.20	0.21	16.60	174.00	5.67	12.50	3.68	15.73	19.39	1.23	4.29	3.77	85.61	4.62	1.06	2.32	23.00	0.93
1	1	21	A/A	A/A	178.5	52	19.1001	120	70	47.60	154.00	30.10	324.00	93.20	12.50	0.18	16.40	145.00	5.11	13.00	4.73	17.83	20.87	1.17	5.10	2.88	93.49	4.94	1.02	1.56	19.08	0.81
1	2	20	A/A	A/A	173	60	22.0386	129	70	49.40	164.00	31.10	332.00	93.60	13.60	0.21	18.50	154.00	5.28	12.90	8.44	19.25	23.79	1.24	3.42	3.60	77.33	4.22	1.33	2.04	25.47	0.90
1	1	21	A/C	A/G	169	53	19.4674	120	70	47.80	160.00	29.30	335.00	87.50	11.80	0.27	16.40	227.00	5.46	12.90	5.74	70.66	35.30	0.50	4.40	4.33	70.14	5.18	1.53	2.38	15.99	1.00
1	2	22	A/A	A/A	169	62	22.7732	110	70	51.20	172.00	29.80	336.00	88.60	9.80	0.32	11.90	329.00	5.78	12.60	5.52	33.10	24.75	0.75	4.85	4.99	110.90	4.68	1.30	3.10	12.13	0.85
1	2	23	A/C	A/G	173	62	22.7732	120	80	44.00	154.00	29.70	350.00	84.80	10.90	0.30	14.20	273.00	5.19	12.90	5.88	16.06	17.09	1.06	7.60	4.30	75.99	4.42	1.00	2.87	26.53	1.03
1	1	20	A/A	A/A	173.5	55	20.202	110	70	47.10	158.00	31.00	335.00	92.50	9.50	0.27	10.80	287.00	5.09	12.30	5.06	16.16	18.44	1.14	4.21	3.57	67.92	4.68	1.24	1.92	13.81	0.74
1	1	20	A/A	A/A	162.5	57	20.9366	120	70	45.90	151.00	30.30	329.00	92.00	9.90	0.26	12.80	263.00	4.99	12.90	5.85	32.54	24.12	0.74	4.24	3.81	74.03	4.88	1.29	2.11	14.00	1.18
1	1	19	A/C	A/G	174	57	20.9366	120	80	47.60	161.00	27.50	338.00	81.40	10.60	0.28	13.20	260.00	5.85	13.30	7.63	19.07	25.10	1.32	5.83	4.67	93.52	5.76	2.05	2.19	18.69	0.80
1	1	19	A/C	A/G	175	55	20.202	120	70	44.80	150.00	31.30	335.00	93.50	9.40	0.27	11.50	288.00	4.79	12.50	6.87	69.80	29.04	0.42	4.61	3.97	70.83	5.01	1.13	2.51	16.03	0.65
1	1	20	A/A	A/A	172	57	20.9366	110	70	46.50	158.00	30.90	340.00	90.80	10.50	0.24	13.60	226.00	5.12	12.30	8.40	17.89	32.05	1.79	3.44	3.53	75.00	4.80	1.54	1.74	14.64	0.63
1	1	19	A/A	A/A	174	56	20.5693	120	80	46.90	153.00	31.50	326.00	96.70	9.90	0.31	12.00	313.00	4.85	12.50	7.62	14.84	20.46	1.38	5.43	3.43	71.35	5.49	1.43	1.66	11.75	0.69
1	1	19	C/C	G/G	177	55	20.202	120	70	49.70	162.00	29.80	326.00	91.40	11.40	0.30	15.50	262.00	5.44	13.00	7.93	23.22	16.26	0.70	4.54	3.86	94.57	5.18	1.59	1.99	37.30	0.69
1	1	20	A/C	A/G	183	61	22.4059	120	80	45.20	153.00	30.80	338.00	90.90	9.40	0.23	11.70	240.00	4.97	12.60	6.14	12.18	19.06	1.56	3.31	3.57	73.95	4.95	1.68	1.65	16.01	0.77
1	1	18	A/A	A/A	180	59	21.6713	110	70	46.50	156.00	29.60	335.00	88.20	10.10	0.25	12.60	245.00	5.27	12.20	5.42	16.93	21.07	1.24	6.51	4.11	88.53	5.28	1.43	2.38	42.28	0.81
1	1	20	A/C	A/G	175	55	20.202	120	80	47.20	156.00	29.10	331.00	88.10	9.20	0.34	11.30	374.00	5.36	12.30	5.74	11.60	20.04	1.73	3.07	3.39	89.04	5.19	1.28	1.71	15.68	1.02
1	1	20	A/C	A/G	170	55	20.202	120	80	46.20	156.00	33.30	338.00	98.70	9.20	0.27	10.70	298.00	4.68	12.10	6.06	22.16	23.18	1.05	3.65	3.64	65.04	5.28	1.33	2.06	14.81	0.94
2	2	19	A/C	G/G	177	58	21.3039	120	70	37.80	119.00	26.40	315.00	83.80	10.10	0.29	13.20	285.00	4.51	13.70	5.05	16.35	20.71	1.27	3.02	5.62	68.79	4.89	2.43	2.71	13.39	0.81
1	3	22	A/C	A/G	172	61	22.4059	110	70	45.50	151.00	29.70	332.00	89.40	9.70	0.28	11.40	293.00	5.09	12.70	9.16	14.30	18.14	1.27	3.50	3.79	81.46	4.76	1.08	2.33	15.64	0.81
1	1	20	C/C	A/G	177	58	21.3039	110	70	45.90	153.00	28.70	333.00	86.00	11.70	0.26	17.80	227.00	5.34	12.60	7.00	11.62	16.11	1.39	4.79	4.45	76.83	5.58	1.14	2.98	8.69	1.03
1	1	20	C/C	G/G	177	62	22.7732	110	70	46.60	153.00	29.50	328.00	89.80	10.90	0.21	14.10	191.00	5.19	13.10	6.59	14.61	18.81	1.29	3.46	3.19	84.92	5.10	1.43	1.53	10.56	0.50
1	2	21	A/C	A/G	168	62	22.7732	120	70	47.50	165.00	27.80	347.00	80.00	11.20	0.39	14.60	344.00	5.94	13.70	7.29	14.88	14.66	0.99	5.01	3.87	93.77	4.87	2.21	1.29	19.42	0.94
1	2	21	A/C	A/G	174	60	22.0386	110	70	46.70	159.00	30.50	340.00	89.60	11.80	0.40	15.80	339.00	5.21	12.30	7.92	15.00	16.74	1.12	6.48	3.52	72.25	5.35	0.96	2.20	7.85	1.91
1	2	20	A/C	A/G	175	61	22.4059	110	70	45.10	152.00	29.60	337.00	87.70	12.80	0.27	19.60	207.00	5.14	12.50	5.19	43.80	25.53	0.58	5.27	5.17	74.45	5.11	1.26	3.45	9.03	1.30
1	2	24	A/A	A/A	163	60	22.0386	120	70	45.40	156.00	30.10	344.00	87.60	11.30	0.23	14.60	208.00	5.18	12.40	4.74	27.43	25.54	0.93	9.37	3.15	88.11	4.81	0.83	2.10	16.75	0.58
1	1	22	A/C	A/G	176	61	22.4059	120	70	50.30	166.00	28.10	330.00	85.10	10.90	0.24	14.00	220.00	5.91	13.10	5.25	19.51	21.56	1.11	6.92	3.81	81.79	4.75	1.17	2.21	22.92	0.76
1	2	22	A/C	A/G	176	55	20.202	116	70	45.50	154.00	29.30	338.00	86.70	9.40	0.24	11.70	255.00	5.25	11.60	6.53	12.92	16.74	1.30	4.25	2.97	97.83	5.05	1.33	1.42	12.40	0.68
1	2	20	A/C	G/G	180	55	20.202	104	70	45.30	143.00	26.60	316.00	84.40	9.80	0.28	11.90	286.00	5.37	13.80	6.23	24.88	18.65	0.75	6.07	3.41	73.31	5.60	1.30	1.84	8.67	0.76
1	2	19	A/C	A/G	171	58	21.3039	120	80	48.40	167.00	31.30	345.00	90.60	9.40	0.20	11.00	216.00	5.34	12.60	6.33	15.86	14.44	0.91	3.41	3.87	81.28	5.72	1.99	1.55	17.45	0.57
1	1	23	A/A	A/A	170	60	22.0386	120	80	46.50	157.00	29.80	338.00	88.40	9.60	0.26	11.60	266.00	5.26	13.00	6.95	12.24	19.88	1.62	2.83	2.31	84.08	5.01	1.05	1.08	6.57	0.72
1	1	21	A/A	A/A	167	55	20.202	98	60	45.60	154.00	29.80	338.00	88.20	11.60	0.28	15.40	245.00	5.17	12.20	7.08	11.69	16.07	1.37	6.65	3.21	78.01	5.27	1.20	1.85	14.92	0.54
1	1	22	A/A	A/A	172	59	21.6713	120	70	49.00	162.00	32.30	331.00	97.60	10.40	0.28	12.50	269.00	5.02	13.50	7.01	15.02	19.07	1.27	3.71	3.20	76.87	4.94	1.17	1.78	9.14	0.81
1	4	19	A/A	A/A	173	58	21.3039	110	70	45.50	154.00	30.70	338.00	90.60	9.30	0.18	10.70	198.00	5.02	12.70	5.89	19.01	17.38	0.91	4.28	3.58	66.35	5.11	1.46	1.93	16.99	0.56
1	2	23	A/A	A/A	170	61	22.4059	114	70	49.40	161.00	29.30	326.00	90.00	11.50	0.26	15.40	225.00	5.49	13.40	7.12	16.54	17.80	1.08	5.99	4.16	85.00	4.59	1.20	2.60	11.11	0.85
1	1	23	A/C	A/G	170	54	19.8347	110	70	46.60	152.00	30.40	326.00	93.20	10.90	0.24	13.80	223.00	5.00	13.60	8.27	12.43	21.53	1.73	5.29	3.38	89.09	4.38	1.36	1.72	17.37	0.62
1	1	20	A/A	A/A	170	62	22.7732	120	70	48.90	162.00	30.10	331.00	90.90	10.80	0.30	12.70	274.00	5.38	12.70	5.95	12.13	18.17	1.50	3.32	3.60	82.96	4.55	1.69	1.67	15.67	0.49
1	1	20	A/C	A/G	168	56	20.5693	120	70	50.60	173.00	30.50	342.00	89.20	9.40	0.26	11.40	274.00	5.67	13.00	4.72	15.30	17.77	1.16	4.31	3.35	76.94	5.07	1.41	1.74	24.54	0.49
1	2	20	A/C	A/G	167	54	19.8347	110	70	46.80	162.00	29.20	346.00	84.50	10.70	0.28	14.30	263.00	5.54	12.80	6.33	9.77	16.11	1.65	6.76	4.29	70.93	4.71	1.34	2.52	9.50	0.85
2	2	21	A/C	G/G	164	58	21.3039	124	70	42.10	139.00	29.40	330.00	89.00	9.30	0.32	11.10	345.00	4.73	13.20	5.21	17.86	19.80	1.11	4.77	6.67	75.07	4.79	1.56	4.61	10.34	0.85
1	2	23	A/A	A/A	164	53	19.4674	114	70	47.10	155.00	29.40	329.00	89.20	11.60	0.34	16.40	296.00	5.28	12.70	6.10	24.15	28.10	1.16	6.70	4.47	68.26	4.56	1.29	2.73	13.59	0.85
1	1	21	A/A	A/A	173	62	22.7732	100	70	48.40	166.00	29.60	343.00	86.30	9.80	0.32	11.30	324.00	5.61	13.10	7.65	16.95	15.73	0.93	3.34	3.15	72.22	4.73	1.14	1.69	12.30	1.29
1	1	22	A/C	A/G	165	55	20.202	114	70	50.50	175.00	29.90	347.00	86.20	11.00	0.29	15.00	262.00	5.86	12.40	6.25	19.71	19.41	0.98	6.17	5.01	85.28	5.03	1.80	2.77	21.23	1.83
1	2	22	A/A	A/A	172	61	22.4059	114	72	46.20	164.00	29.90	355.00	84.20	10.70	0.31	13.40	290.00	5.49	12.80	6.01	18.62	18.50	0.99	3.51	3.87	81.78	4.89	1.18	2.38	11.21	0.99
1	2	25	A/A	A/A	167	52	19.1001	110	60	44.20	151.00	29.80	342.00	87.20	10.20	0.26	13.50	250.00	5.07	13.10	7.25	29.66	24.00	0.81	4.39	3.06	77.73	4.73	1.19	1.50	13.39	1.09
1	1	21	A/C	A/G	171	60	22.0386	122	80	47.10	159.00	31.20	338.00	92.50	10.10	0.25	12.40	252.00	5.09	12.40	6.49	9.53	16.08	1.69	3.86	3.56	83.57	4.53	1.18	2.17	15.73	0.55
1	1	23	A/C	A/G	162	52	19.1001	120	70	46.10	152.00	29.30	330.00	88.80	9.60	0.39	11.60	410.00	5.19	13.10	5.58	22.81	23.93	1.05	4.09	4.68	72.89	5.02	1.34	2.90	9.82	1.00
1	1	22	A/A	A/A	162	53	19.4674	120	80	45.60	151.00	28.60	331.00	86.40	11.60	0.32	17.00	275.00	5.28	13.30	7.72	14.51	24.18	1.67	3.75	4.40	85.63	5.28	1.04	2.90	25.30	1.82
1	1	21	A/A	A/A	167	58	21.3039	110	70	49.50	169.00	28.30	341.00	82.90	11.90	0.22	14.90	189.00	5.97	12.80	5.67	94.72	35.24	0.37	4.69	5.35	85.62	4.82	1.35	3.60	17.97	1.42
1	2	22	A/C	A/G	170	60	22.0386	120	60	44.80	148.00	28.60	330.00	86.50	11.10	0.29	14.20	259.00	5.18	12.50	4.84	12.28	18.13	1.48	4.76	4.43	77.33	4.80	1.89	2.20	8.07	0.54
1	1	21	A/A	A/A	171	62	22.7732	130	80	49.30	169.00	31.00	343.00	90.30	10.30	0.26	12.50	250.00	5.46	12.40	5.32	14.39	17.65	1.23	3.59	3.62	90.71	4.72	1.20	2.14	11.37	1.19
1	2	21	A/C	G/G	177	57	20.9366	120	70	47.00	161.00	29.80	343.00	86.90	10.70	0.24	12.80	222.00	5.41	12.70	6.19	22.55	17.78	0.79	6.17	4.40	78.92	4.85	1.59	2.51	15.57	0.44
1	1	21	A/C	A/G	169	62	22.7732	122	70	43.00	143.00	30.50	333.00	91.70	10.70	0.37	12.80	345.00	4.69	11.60	5.48	10.33	18.44	1.79	4.89	3.67	81.89	4.47	1.30	2.13	17.20	0.95
1	2	22	A/C	A/G	170	59	21.6713	130	80	46.50	160.00	29.20	344.00	84.90	11.80	0.37	17.10	313.00	5.48	13.00	5.11	23.94	19.80	0.83	4.63	3.84	72.98	5.04	1.27	2.17	11.08	0.44
1	1	23	A/C	A/G	180	56	20.5693	129	86	47.70	166.00	30.40	348.00	87.40	11.80	0.30	15.90	256.00	5.46	12.60	4.40	20.58	20.82	1.01	5.86	4.75	83.03	4.70	1.75	2.63	31.68	0.77
1	2	24	A/C	A/G	170	56	20.5693	120	74	46.70	160.00	31.10	343.00	90.90	11.70	0.34	15.40	286.00	5.14	12.90	7.41	10.46	19.06	1.82	6.56	4.50	81.15	4.98	1.14	2.65	18.60	1.81
1	1	20	A/C	G/G	171	59	21.6713	110	70	45.00	153.00	30.10	340.00	88.60	9.90	0.33	12.20	329.00	5.08	12.10	4.73	8.60	14.89	1.73	6.25	4.72	85.37	4.68	1.23	2.99	23.31	1.12
1	2	20	A/C	A/G	166	60	22.0386	110	70	44.30	148.00	29.80	334.00	89.30	10.40	0.28	12.70	267.00	4.96	12.40	6.57	10.06	16.77	1.67	4.42	3.29	74.33	5.30	1.40	1.61	33.93	0.64
1	1	20	A/C	A/G	167	62	22.7732	110	70	55.30	197.00	31.10	356.00	87.40	10.50	0.22	13.40	211.00	6.33	13.00	7.69	17.03	82.20	4.83	5.51	4.16	70.06	4.23	1.34	2.38	22.45	0.87
1	1	20	A/A	A/A	174	60	22.0386	110	70	50.40	166.00	27.80	329.00	84.30	12.50	0.25	18.90	197.00	5.98	14.80	7.61	12.48	20.72	1.66	3.95	3.68	72.21	5.14	1.20	2.16	18.68	0.98
1	2	22	A/C	A/G	174	62	22.7732	130	80	46.70	159.00	31.40	340.00	92.30	11.00	0.21	15.20	188.00	5.06	12.00	7.15	16.84	20.03	1.19	5.61	3.48	74.82	5.21	1.42	1.84	12.45	0.91
1	2	19	A/C	A/G	164	55	20.202	114	70	47.70	162.00	30.30	340.00	89.30	11.70	0.26	15.50	226.00	5.34	12.30	6.55	16.43	19.04	1.16	4.51	4.89	87.80	4.42	1.37	3.19	11.69	0.68
1	1	19	A/A	A/A	167	53	19.4674	100	60	47.40	154.00	29.30	325.00	90.10	8.90	0.24	10.20	267.00	5.26	13.00	5.73	12.96	21.33	1.65	4.66	4.75	72.01	4.51	1.73	2.79	19.30	0.80
1	1	19	A/A	A/A	178	61	22.4059	110	70	46.50	155.00	27.10	333.00	81.40	11.40	0.25	15.90	219.00	5.71	13.00	6.73	10.41	16.85	1.62	3.80	4.71	80.88	4.90	1.52	2.66	22.60	0.81
1	2	20	A/A	A/A	167	56	20.5693	110	70	46.50	157.00	29.40	338.00	87.10	10.60	0.26	13.30	247.00	5.34	12.80	5.65	12.62	19.00	1.51	5.74	3.55	98.17	4.97	1.51	1.82	15.47	0.51
1	1	19	A/C	A/G	170	61	22.4059	90	60	46.80	159.00	29.50	340.00	86.80	10.00	0.33	12.50	326.00	5.39	12.50	7.74	10.68	19.34	1.81	4.50	3.79	77.41	4.37	1.32	2.09	16.20	1.30
1	1	23	A/A	A/A	186	60	22.0386	110	70	44.40	148.00	26.10	333.00	78.20	12.00	0.24	16.60	203.00	5.68	13.20	4.45	8.49	15.32	1.80	4.78	4.19	80.79	4.67	1.33	2.45	18.20	0.97
1	2	20	A/A	A/A	169	62	22.7732	120	70	44.10	146.00	29.50	331.00	89.10	9.70	0.30	11.60	311.00	4.95	13.40	6.87	14.30	24.18	1.69	7.32	3.63	76.16	4.15	1.03	2.18	15.47	0.76
1	1	21	A/C	A/G	170	59	21.6713	120	80	48.90	169.00	31.10	346.00	90.10	10.50	0.32	13.70	300.00	5.43	12.50	6.97	27.70	23.44	0.85	5.36	3.98	77.69	4.32	1.21	2.46	25.36	1.26
1	1	20	A/A	A/A	160	52	19.1001	120	70	44.50	149.00	29.70	335.00	88.60	10.40	0.25	12.90	239.00	5.02	12.20	8.40	26.69	23.31	0.87	3.15	4.29	78.11	4.99	1.22	2.70	12.20	1.03
1	2	24	A/A	A/A	174	59	21.6713	120	70	46.80	158.00	28.30	338.00	83.90	9.50	0.29	11.30	307.00	5.58	13.50	7.33	13.33	16.01	1.20	3.64	4.02	90.08	4.70	1.51	1.99	13.50	1.44
1	2	21	A/C	A/G	173	58	21.3039	110	70	51.70	168.00	27.40	325.00	84.30	11.10	0.40	13.80	364.00	6.13	14.70	8.89	11.68	16.92	1.45	5.03	4.20	63.17	5.05	1.41	2.50	5.56	0.74
1	1	19	A/C	A/G	170	60	22.0386	120	70	48.60	164.00	28.70	337.00	85.10	10.90	0.26	14.20	241.00	5.71	12.60	6.01	12.59	19.28	1.53	4.28	4.01	74.40	4.79	1.61	2.05	20.66	0.78
2	2	19	A/C	G/G	164	60	22.0386	120	70	40.90	135.00	30.20	330.00	91.50	10.40	0.36	12.10	346.00	4.47	12.90	6.07	22.41	29.96	1.34	3.48	3.40	56.80	4.57	1.54	1.48	13.59	0.70
2	1	20	C/C	A/G	156	60	22.0386	100	60	44.80	149.00	30.20	333.00	90.70	11.90	0.22	16.60	181.00	4.94	12.30	7.95	10.36	16.70	1.61	4.62	3.92	64.70	4.76	1.22	2.24	17.99	1.11
1	2	23	C/C	G/G	163	59	21.6713	120	70	44.70	154.00	30.90	345.00	89.80	9.70	0.38	11.70	390.00	4.98	12.60	4.92	13.35	15.95	1.19	4.47	4.39	77.52	4.41	1.06	2.81	11.72	1.01
2	1	22	C/C	A/G	166	55	20.202	94	62	35.30	110.00	26.40	312.00	84.90	11.40	0.38	14.20	335.00	4.16	14.00	6.05	11.05	15.79	1.43	4.94	4.37	64.07	4.45	1.43	2.53	8.34	0.69
2	2	21	C/C	A/G	160	51	18.7328	110	70	36.90	119.00	28.10	322.00	87.00	10.60	0.32	13.80	303.00	4.24	13.50	4.69	9.72	13.95	1.44	3.15	3.54	59.00	4.34	1.36	1.77	4.47	0.85
1	2	22	A/C	A/G	172	60	22.0386	120	70	45.10	151.00	28.20	335.00	84.10	11.10	0.20	15.00	179.00	5.36	13.00	4.20	12.07	15.44	1.28	6.04	3.51	69.78	4.28	1.38	1.80	11.87	0.66
1	2	21	A/C	A/G	178	55	20.202	130	80	47.00	157.00	28.20	334.00	84.40	12.60	0.24	18.50	190.00	5.57	13.00	5.26	17.41	22.81	1.31	4.04	4.06	87.28	4.52	1.39	2.34	12.14	1.08
2	2	25	A/C	G/G	167	60	22.0386	105	70	42.30	140.00	28.10	331.00	84.90	11.40	0.37	14.90	326.00	4.98	13.30	7.46	12.74	17.27	1.36	3.20	3.48	68.12	4.99	1.07	2.12	6.34	1.10
2	16	23	A/C	G/G	173	59	21.6713	110	80	41.60	135.00	30.00	325.00	92.40	11.00	0.32	14.60	288.00	4.50	13.00	7.05	7.43	10.18	1.37	3.35	3.18	62.56	4.91	1.09	1.75	16.73	0.68
1	2	23	A/C	G/G	167.5	55	20.202	116	70	43.50	148.00	28.70	340.00	84.30	10.70	0.24	13.10	228.00	5.16	13.80	6.84	20.55	22.92	1.12	2.78	3.96	76.29	5.02	1.60	1.89	17.95	1.13
1	2	21	A/C	G/G	160	55	20.202	90	50	44.30	151.00	30.20	341.00	88.60	10.80	0.25	14.80	232.00	5.00	12.90	6.04	8.05	14.94	1.86	6.10	3.88	76.74	4.79	0.96	2.47	11.85	0.95
2	1	23	A/C	G/G	172	59	21.6713	110	60	33.40	100.00	22.20	299.00	74.10	9.50	0.36	11.00	380.00	4.51	17.10	7.31	7.30	13.40	1.84	5.55	3.50	51.08	4.51	1.30	1.81	6.51	0.62
1	2	22	C/C	G/G	170	60	22.0386	110	68	47.60	158.00	28.40	332.00	85.50	11.80	0.33	16.00	277.00	5.57	13.00	7.91	19.81	16.67	0.84	7.05	3.32	86.86	4.86	1.35	1.68	10.07	0.91
2	1	21	A/C	G/G	162	52	19.1001	100	60	43.50	149.00	31.30	343.00	91.40	11.00	0.21	14.00	192.00	4.76	13.00	4.33	10.49	12.52	1.19	5.79	3.77	64.02	5.04	1.27	2.21	14.30	0.45
2	1	22	C/C	A/G	158	54	19.8347	110	80	43.50	142.00	28.90	326.00	88.60	11.00	0.29	13.90	260.00	4.91	13.00	6.38	38.06	28.61	0.75	4.59	4.26	61.83	4.59	1.56	2.37	9.51	0.45
1	2	25	C/C	G/G	167	62	22.7732	128	80	47.10	160.00	28.10	340.00	82.80	10.20	0.35	12.10	345.00	5.69	13.10	10.53	13.28	15.48	1.17	4.09	4.26	80.81	4.00	1.52	2.30	24.01	1.02
														蓝色=偏低数值，粉色=偏高数值
														绿色=体重正常组，橙色=肥胖组
