# Supplementary material for: Associations between squalene epoxidase gene polymorphisms and obesity.
Source: PeerJ journal article supplement (doi:10.7717/peerj.19635), 2025-01-01
Supplement: The_dataset_of_SQLE_in_the_obese_group.xlsx [file The_dataset_of_SQLE_in_the_obese_group.xlsx]

## Sheet: Sheet1
Gender (1=male, 2=female)	Ethnicity (1 = Han, 2 = Uyghur, 3 = Kazakh, 4 = Hui, 5 = Mongol, 6 = Kyrgyz, 7 = Manchu, 8 = Zhuang, 9 = Tajik, 10 = Daur, 11 = Uzbek, 12 = Xibe, 13 = Gelao, 14 = Tibetan, 15 = Tatar, 16 = Salar)	Age (years)	rs10104486	rs2288312	Height (cm)	Weight(kg)	Body Mass Index,BMI (18.5-22.99KG/M^2 control group, >25 included in the obese group)	Systolic Blood Pressure,SBP (≥140 mmHg)	Diastolic Blood Pressure,DBP(≥90mmHg)	Hematocrit,HCT (male: 42%-49%; female: 37%-43%)	Hemoglobin ,HGB (male: 120-165 g/L; female: 110-150 g/L)	Mean Corpuscular Hemoglobin Concentration，MCH(27-31pg)	Mean Hemoglobin Concentration of Red BloodCells,MCHC (310-370 g/L)	Mean Corpuscular Volume,MCV (80-90 fl)	Mean Platelet Volume,MPV (9.0-13fl)	Platelet Crit,PCT (0.11%-0.23%)	Platelet volume Distribution width,PD(15-20CV%)	Platelet,PLT ((100-300)×10^9/L)	Red Blood Cells,RBC(4.3-5.8×10^12/L)	Red Blood Cell Distribution Width,RDW（Male：10-16%；Female：10-16%）	White Blood Cells,WBC((3.5-9.5)x 10^9/L)	Alanine Aminotransferase,ALT(0-40U/L）	Aspartate Aminotransferase,AST(0-37U/L)	AST:ALT（ 0.80-1.5）	Blood Urea Nitrogen,BUN(2.9-7.5mmol/L)	Total Cholesterol,CHOL（0-5.2mmol/L）	Creatinine,CREA（58-110μmol/L）	Glucose（3.9-6.1mmol/L）	HDL-C（1.03-1.55mmol/L）	LDL-C(1.9-3.8mmol/L)	Total Bilirubin,T-BIL（5.13-22.24μmol/L）	Triglycerides,TG（0-1.69mmol/L）
1	2	23	C/C	G/G	163	69	25.3444	100	64	49.6	164	30.5	331	92.2	11.1	0.24	14.8	218	5.38	12.5	6.89	28.26	20.4	0.72	6.52	3.61	83.69	4.97	0.78	2.54	11.73	1.32
1	1	19	C/C	G/G	192	104	38.2002	138	90	48.6	158	30.3	325	93.1	9.9	0.25	12.4	257	5.22	12.3	6.52	20.12	15.63	0.78	7.15	3.94	109.8	5.74	1.17	2.56	10.81	0.99
1	1	21	A/C	A/G	173	72	26.4463	120	80	45.2	155	29.5	343	86.1	10.4	0.22	12.8	210	5.25	12.7	7.08	19.09	17.74	0.93	5.63	4.58	95.2	4.92	1.67	2.62	12.96	1.38
1	1	21	A/C	A/G	180	72	26.4463	120	70	47.5	159	29.3	335	87.6	9.8	0.35	12.1	356	5.42	12.5	8.7	34.59	22.79	0.66	5.28	4.52	111.31	5.07	1.04	3.06	20.11	1.01
1	2	23	A/C	A/G	180	92	33.7925	114	70	45.5	151	30.2	332	91	9.6	0.35	11.4	366	5	12.3	7.91	36.08	18.61	0.52	3.63	3.51	103.3	5.45	1.37	2.05	23.11	1.02
1	1	21	A/C	A/G	183	78	28.6501	130	90	45.6	155	29.2	340	86	11.1	0.18	14.7	159	5.3	12.4	12.91	17.15	16.06	0.94	4.25	2.83	85.18	4.79	1.18	1.5	11.08	0.65
1	1	19	C/C	G/G	193	81	29.7521	122	80	47.6	158	30.9	332	93	9.5	0.24	11.9	249	5.12	12	4.06	17.24	14.54	0.84	4.42	4.01	89.43	5.17	1.52	2.26	18.4	0.53
1	1	21	C/C	G/G	179	75	27.5482	114	68	45.4	161	28.7	355	80.9	12.8	0.35	18.2	276	5.61	12.8	7.78	21.26	15.95	0.75	6.93	3.53	83.88	4.81	1.11	2.03	13.86	0.95
1	1	20	A/C	A/G	178	100	36.7309	134	90	48	162	28.4	338	84.1	10.5	0.34	13.7	327	5.71	13.1	7.13	37.91	21.99	0.58	4.14	4.13	107.74	5.12	1	2.6	9.4	2.55
1	2	22	A/C	A/G	172	74	27.1809	110	70	42.3	142	30.2	336	90	11.4	0.45	14.6	395	4.7	14.2	8.71	19.45	16.6	0.85	5.65	3.87	90.12	4.69	1.08	2.46	8.66	1.13
2	1	20	A/A	A/A	159	69	25.3444	120	70	43.1	145	31.1	336	92.5	9.9	0.43	12.4	435	4.66	11.9	6.89	31.95	21.23	0.66	4.9	4.58	76.74	5.56	1.01	2.86	15.05	2.46
1	1	20	A/C	A/G	181	78	28.6501	120	80	48.8	163	31.5	334	94.4	11.5	0.35	16.3	303	5.17	12.6	6.68	49.76	24.12	0.48	6.12	4.23	71.97	5.39	1.08	3	13.51	1.15
1	1	21	C/C	G/G	180	78	28.6501	130	80	46.7	156	30.2	334	90.3	10.9	0.31	14.3	284	5.17	12.2	8.66	16.56	14.31	0.86	4.7	4.28	95.6	5.79	1.29	2.68	12.96	1.01
1	1	20	C/C	G/G	176	78	28.6501	120	70	50.8	179	33.5	352	95.1	9.3	0.37	10.9	397	5.34	12	7.15	17.14	18.67	1.09	4.09	4.35	93.3	5.13	1.13	2.85	17.35	0.93
1	1	21	A/A	A/G	177	95	34.8944	120	74	48.2	166	30.6	344	88.9	10.6	0.36	14.2	341	5.42	12.9	9.46	97.49	47.36	0.49	3.37	4.37	83.33	8.26	1.31	2.53	9.61	2.14
2	1	20	A/A	A/A	166	75	27.5482	120	82	39.1	128	27.9	327	85.4	10.7	0.41	12.9	385	4.58	12.7	7.77	31.81	20.53	0.65	3.73	3.43	54.26	5.47	1.02	2.23	7.89	1.19
1	1	22	A/C	A/G	180	85	31.2213	100	60	48.6	163	28.3	335	84.4	12.7	0.28	19.5	217	5.76	13.4	6.72	28.78	20.07	0.7	6.61	4.38	105.95	5.63	1.37	2.67	17.14	0.99
1	1	20	A/C	A/G	172	78	28.6501	120	70	46.5	155	28.2	333	84.7	10.2	0.32	12.5	308	5.49	13.5	7.1	26.53	14.67	0.55	7.1	5.47	100.91	4.94	1	3.79	15.84	1.74
1	1	21	C/C	G/G	172	70	25.7117	124	90	47.6	159	29.8	334	89.1	10.6	0.33	13.1	312	5.34	13.6	8.45	23.08	17.4	0.75	4.61	4.08	88.89	4.61	0.94	2.63	13.31	1.54
1	1	21	C/C	G/G	180	69	25.3444	100	60	48.2	162	29.6	336	88.1	9.9	0.18	13	179	5.47	12.5	6.49	11.12	19.16	1.72	5.23	4.06	98.6	5.29	1.41	2.28	11.5	0.73
2	1	20	A/A	A/A	163	78	28.6501	120	70	38.2	121	27.6	317	87	11.3	0.45	14.5	401	4.39	13.5	8.99	12.22	17.01	1.39	2.13	3.52	68.6	5.18	1.46	1.84	8.71	0.91
2	1	21	A/C	A/G	167	69	25.3444	114	70	36.9	115	28.4	312	91.1	10.1	0.32	12.4	318	4.05	14.9	5.98	13.13	13.54	1.03	2.79	4.1	67.71	5.26	1.44	2.24	14.34	0.86
1	2	22	C/C	G/G	182	75	27.5482	110	70	47.5	160	29.9	337	88.8	12.3	0.22	17.6	181	5.35	12.3	6.16	20.34	21.14	1.04	3.45	3.9	69.04	4.91	1.83	1.82	12.38	0.54
1	1	21	A/C	A/G	175	86	31.5886	126	82	48.5	167	30.3	344	88	11.1	0.36	13.8	321	5.51	12.4	8.02	45.52	27.95	0.61	3.79	4.48	86.39	5.16	0.97	3.29	24.3	0.84
1	2	20	A/C	A/G	192	88	32.3232	126	84	48.1	165	30.7	343	89.6	11.7	0.23	15.7	200	5.37	13.3	6.28	23.84	19.78	0.83	4.48	3.14	97.49	4.52	1.22	1.72	14.35	0.82
1	2	23	A/C	A/G	174	74	27.1809	110	60	49.6	173	29.2	349	83.8	11.3	0.31	14.6	275	5.92	13.2	5.72	43.53	21.53	0.49	3.88	3.68	96.06	5.17	0.99	2.43	17.66	1.11
1	2	21	A/C	A/G	183	82	30.1194	128	72	46.2	154	30.1	333	90.2	12.1	0.31	17	259	5.12	12.9	8.53	19.67	16.09	0.82	5.46	3.74	82.97	4.68	1.03	2.3	13.34	1.45
2	1	21	A/C	A/G	171	78	28.6501	124	80	41.2	133	29.6	323	91.8	11.5	0.3	14.4	258	4.49	12.7	5.72	26.18	32.18	1.23	4.6	4.19	75.59	4.23	1.54	2.4	26.17	0.57
1	1	21	C/C	G/G	177	102	37.4656	126	70	48.3	157	29.1	325	89.4	12	0.33	16.8	271	5.4	13.3	8.03	34.92	17.71	0.51	4.25	4.34	105.42	4.93	0.95	3.08	11.16	1.53
1	2	20	C/C	G/G	175	74	27.1809	130	80	43.9	142	28.3	323	87.6	9.1	0.3	11.1	329	5.01	12.8	7.08	19.64	18.92	0.96	5.55	3.74	99.94	4.84	1.23	2.22	7.31	0.61
1	1	20	A/C	A/G	164	69	25.3444	100	70	48.8	157	28.8	322	89.5	11.6	0.31	14.7	265	5.45	13.6	4.22	14.34	18.2	1.27	3.82	3.45	90.41	4.85	1.19	2.04	14.35	0.76
1	1	19	A/C	A/G	178	75	27.5482	120	60	51.9	171	29.4	329	89.2	11.5	0.3	15.1	263	5.82	13.8	7.81	48.62	26.21	0.54	3.04	3.53	92.18	5.33	1.16	2.15	16.5	1.33
1	1	21	A/C	A/G	185	85	31.2213	110	70	47.9	160	29.7	334	88.9	12.3	0.23	17.2	184	5.39	12.8	4.91	16.27	14.38	0.88	4.96	3.52	97.44	5.31	1.16	1.99	25.2	1.02
1	3	19	A/C	A/G	186	108	39.6694	130	90	47.2	155	30.2	328	92	11.4	0.29	14	258	5.13	13.2	6.58	17.73	16.37	0.92	4.02	3.8	88.32	5.36	1.11	2.24	11.53	1.33
1	1	20	A/C	A/G	174	87	31.9559	120	80	46.4	159	30.7	343	89.6	11	0.32	14.5	290	5.18	13	6.68	29.45	25.6	0.87	4.59	3.65	92.87	5.49	1.23	2.2	9.02	0.48
2	1	20	A/A	A/A	169	75	27.5482	114	70	42.6	137	29.1	322	90.6	11.9	0.41	15.8	343	4.7	12.9	7.61	15.11	18	1.19	3.93	4.32	64.96	5.02	1.46	2.43	14.31	0.84
1	2	19	A/C	A/G	178	69	25.3444	130	90	45.7	154	29.5	337	87.5	11.1	0.28	14.8	254	5.22	12.6	6.43	16.37	15.68	0.96	4.94	3.79	76.18	5.33	1.52	2.04	21.43	0.7
1	2	21	A/C	A/G	192	81	29.7521	130	90	43	145	28.6	337	84.8	10.9	0.38	13.8	353	5.07	13.7	6.14	19.65	18.99	0.97	4.88	3.49	96.67	4.92	1.04	2.25	14.2	0.53
1	2	21	C/C	G/G	178	72	26.4463	124	80	46.5	155	28.8	333	86.3	10.8	0.37	14	343	5.39	12.8	5.94	16.67	17.11	1.03	5.04	4	96.96	4.65	1.12	2.55	22.45	0.77
2	1	19	A/C	A/G	165	75	27.5482	112	70	43.3	142	29.5	328	89.8	12	0.23	15.3	196	4.82	13.4	6.22	19.04	19.08	1	3.38	4.95	80.16	4.55	2.25	2.32	7.55	0.36
1	2	19	C/C	G/G	174	72	26.4463	110	68	48.4	160	29.4	331	88.8	10.9	0.31	13.4	285	5.45	13.3	5.39	30.92	22.14	0.72	3.9	3.99	96.16	5.12	1.15	2.52	14.87	1.1
1	1	19	A/C	A/G	179	77	28.2828	100	60	43.7	143	28.7	327	87.8	11.4	0.32	15.2	276	4.98	13.9	5.91	18.42	16.41	0.89	4.88	3.52	91.51	4.7	1.31	1.92	14.58	0.81
1	1	22	A/C	A/G	170	96	35.2617	120	60	47.8	156	27.8	326	85.2	10.3	0.34	12.9	329	5.61	13.2	4.28	27.07	29.9	1.1	3.64	5.32	97.95	4.58	0.89	3.62	13.3	2.61
1	2	20	A/C	A/G	176	78	28.6501	120	80	47.7	165	30.3	346	87.5	11.5	0.27	14.4	231	5.45	12.4	6.14	24.41	17.05	0.7	4.67	4.45	101.15	4.82	1.19	2.99	13.71	0.98
1	1	19	C/C	A/G	179	97	35.629	130	92	49.9	172	29.4	345	85.3	11.6	0.31	16.6	271	5.85	13.1	6.74	26.9	16.02	0.6	4.95	4.87	88.5	4.5	1.29	3.03	13.86	1.16
1	2	20	A/C	A/G	176	76	27.9155	100	60	47.9	163	31.3	340	91.9	11.2	0.35	14.6	313	5.21	12.4	7.06	9.65	13.59	1.41	2.87	3.59	89.85	4.58	0.95	2.33	21.89	0.72
2	1	21	A/C	A/G	168	72	26.4463	100	70	39.2	127	29.7	324	91.6	10.9	0.38	13.6	350	4.28	12.3	8.74	11.25	16.57	1.47	4.47	4.12	81.05	4.92	1.56	2.35	16.93	0.79
1	3	21	A/A	A/A	182	85	31.2213	124	80	44.10	135.00	24.20	306.00	79.20	10.00	0.35	12.40	346.00	5.57	15.20	7.96	16.36	17.08	1.04	3.73	2.98	84.93	4.39	1.31	1.68	9.41	0.39
1	3	21	A/A	A/A	182	72	26.4463	122	80	49.50	168.00	30.20	339.00	88.90	9.20	0.18	10.90	196.00	5.57	12.30	6.73	26.67	24.54	0.92	4.63	3.39	78.10	5.19	1.45	1.79	14.25	0.43
1	1	20	A/C	A/G	179	91	33.4252	130	80	47.50	164.00	30.90	345.00	89.50	9.90	0.28	12.10	278.00	5.31	12.10	6.32	37.73	20.74	0.55	4.27	5.11	96.30	5.30	1.00	3.35	13.15	3.19
1	1	19	A/A	A/A	180	76	27.9155	110	60	49.80	166.00	30.60	333.00	91.70	9.80	0.26	12.10	265.00	5.43	13.10	5.15	11.68	14.07	1.20	4.67	4.53	92.79	5.06	1.17	3.21	16.77	0.86
1	1	19	A/C	A/G	174	77	28.2828	120	80	42.80	142.00	31.10	332.00	93.70	10.60	0.25	13.30	232.00	4.57	12.60	6.41	17.91	14.74	0.82	4.23	3.96	89.21	5.39	1.05	2.52	11.35	1.21
2	1	19	A/C	A/G	156	71	26.079	110	74	42.00	140.00	30.90	333.00	92.70	9.60	0.25	12.00	259.00	4.53	12.40	7.09	21.67	15.73	0.73	3.64	3.82	80.07	5.46	1.21	2.23	7.41	1.11
2	1	19	A/C	A/G	158	73	26.8136	120	80	42.40	138.00	27.10	325.00	83.10	9.80	0.36	12.60	371.00	5.10	13.00	5.02	18.79	18.16	0.97	3.63	4.84	73.44	5.31	1.83	2.72	14.83	0.65
1	1	20	A/C	A/G	172	75	27.5482	120	74	44.80	146.00	29.70	326.00	91.20	11.20	0.36	14.20	319.00	4.91	13.40	7.19	13.14	14.69	1.12	4.64	3.32	92.50	5.21	1.29	1.84	10.42	0.51
1	1	21	A/C	G/G	174	94	34.5271	120	90	50.20	180.00	30.30	359.00	84.50	12.20	0.24	17.30	199.00	5.94	12.20	8.28	24.86	17.93	0.72	5.54	3.57	85.92	5.09	1.28	1.93	18.84	1.23
2	1	20	A/C	A/G	167	79	29.0174	120	82	28.60	83.00	20.20	290.00	69.60	10.50	0.36	12.70	345.00	4.11	18.30	5.28	12.21	19.69	1.61	4.69	3.95	61.00	5.06	1.27	2.37	6.55	0.90
1	1	20	A/C	A/G	164	70	25.7117	110	70	47.80	166.00	31.00	347.00	89.30	10.00	0.31	12.40	305.00	5.35	12.90	5.20	21.63	22.53	1.04	3.77	4.27	88.00	5.25	0.82	2.89	10.75	1.89
1	1	19	A/C	A/G	181	71	26.079	112	70	49.10	164.00	29.90	334.00	89.60	11.60	0.26	16.30	225.00	5.48	13.20	7.04	13.28	17.78	1.34	4.80	4.46	96.17	5.20	1.44	2.62	12.07	0.74
1	1	19	A/A	A/A	175	93	34.1598	112	70	48.20	162.00	29.20	336.00	86.80	9.40	0.29	11.20	313.00	5.55	12.50	5.75	18.17	21.33	1.17	3.96	3.47	93.47	5.58	1.22	1.97	11.20	0.75
1	1	19	C/C	G/G	188	85	31.2213	110	80	47.60	153.00	29.00	321.00	90.20	9.70	0.32	11.80	332.00	5.28	14.10	7.14	18.89	22.89	1.21	3.06	3.30	101.57	5.28	1.08	1.93	14.29	1.01
1	3	20	A/C	A/G	183	74	27.1809	130	90	43.00	137.00	27.70	319.00	86.90	10.20	0.37	13.00	359.00	4.95	13.20	7.67	108.17	348.18	3.22	4.71	3.13	98.65	4.26	1.19	1.74	5.55	0.72
2	1	19	A/C	A/G	161	80	29.3848	114	70	41.80	141.00	29.60	337.00	87.60	9.90	0.32	12.10	326.00	4.77	12.50	7.03	18.33	19.42	1.06	4.13	4.20	59.75	5.45	1.48	2.35	9.62	1.38
1	1	20	A/A	A/A	172	71	26.079	110	70	52.20	176.00	29.70	337.00	88.20	9.20	0.22	10.70	237.00	5.92	12.80	5.26	26.13	24.44	0.94	3.40	3.51	80.82	4.90	1.09	2.15	14.17	0.89
1	1	18	A/A	A/A	177	80	29.3848	120	80	47.80	161.00	30.30	337.00	89.80	10.90	0.24	14.20	220.00	5.32	12.40	4.05	25.39	17.45	0.69	3.52	4.05	82.46	5.04	1.16	2.56	21.79	1.29
1	2	21	A/C	A/G	169	70	25.7117	110	70	46.50	155.00	28.20	333.00	84.70	10.20	0.34	11.90	327.00	5.49	13.20	6.79	20.05	19.78	0.99	4.02	3.45	83.79	4.96	1.17	1.95	17.14	0.82
2	2	20	A/C	A/G	170	74	27.1809	100	70	37.10	120.00	29.60	323.00	91.60	9.40	0.29	11.10	305.00	4.05	13.80	7.78	15.10	12.96	0.86	5.77	3.19	66.13	4.57	1.14	1.79	8.67	0.65
2	1	20	A/A	A/A	166	76	27.9155	112	70	42.10	142.00	30.40	337.00	90.10	11.30	0.29	15.00	255.00	4.67	13.20	6.68	15.31	16.36	1.07	5.69	4.21	78.02	4.15	2.26	1.76	18.33	0.89
1	1	19	A/C	A/G	172	76	27.9155	110	70	46.20	155.00	28.80	335.00	85.70	12.10	0.40	16.90	326.00	5.39	13.20	5.57	25.44	20.84	0.82	3.82	4.58	86.41	5.52	1.34	2.85	11.16	0.96
2	1	18	A/C	A/A	168	72	26.4463	110	70	41.50	131.00	29.30	316.00	92.80	8.90	0.36	10.10	401.00	4.47	13.10	7.22	16.80	17.60	1.05	4.22	4.24	67.01	4.77	1.40	2.62	6.27	0.74
1	3	21	C/C	G/G	175	76	27.9155	118	80	49.30	169.00	28.70	343.00	83.70	11.20	0.29	15.20	261.00	5.89	12.70	6.53	17.99	16.08	0.89	5.22	3.46	83.91	5.14	1.16	2.09	17.47	0.47
2	1	19	A/C	A/G	178	72	26.4463	104	70	43.20	146.00	30.50	338.00	90.40	10.40	0.37	12.90	355.00	4.78	12.10	7.95	48.91	23.11	0.47	2.76	4.89	73.47	4.83	1.62	2.96	30.20	0.62
1	1	18	A/C	A/G	174	81	29.7521	120	80	50.40	170.00	30.00	337.00	89.00	9.50	0.35	11.20	370.00	5.66	13.20	8.80	29.67	31.90	1.08	4.12	2.86	107.94	5.39	1.09	1.57	8.36	0.69
2	1	18	A/C	A/A	181	99	36.3636	120	80	38.50	122.00	26.80	317.00	84.60	11.80	0.33	14.90	279.00	4.55	15.40	4.93	27.40	36.13	1.32	3.46	3.50	89.33	4.54	1.27	2.07	8.68	0.89
1	1	19	A/A	A/A	175	102	37.4656	130	80	46.10	161.00	30.20	349.00	86.50	9.80	0.30	12.70	303.00	5.33	12.00	7.79	41.18	23.63	0.57	3.87	3.75	99.22	5.44	1.15	2.42	9.17	1.16
1	2	24	A/A	A/A	181	76	27.9155	124	80	49.00	171.00	28.50	349.00	81.50	11.60	0.29	16.40	250.00	6.01	12.30	6.35	47.12	31.10	0.66	4.92	5.14	87.67	4.97	1.26	3.52	16.36	0.79
1	2	21	A/C	A/G	183	97	35.629	134	90	47.20	161.00	31.00	341.00	90.90	9.80	0.32	11.70	321.00	5.19	13.10	8.13	26.83	15.69	0.58	3.14	4.71	98.41	5.25	1.22	2.91	10.95	2.16
1	2	23	A/A	A/A	175	70	25.7117	120	80	45.30	146.00	29.30	322.00	90.80	10.50	0.28	13.70	270.00	4.99	13.10	6.40	15.78	20.29	1.29	4.68	3.99	82.18	4.94	1.26	2.45	9.94	0.70
1	2	21	A/C	A/G	184	83	30.4867	110	70	46.40	158.00	29.60	341.00	86.90	11.60	0.28	15.10	238.00	5.34	13.50	6.00	19.70	24.00	1.22	4.06	3.46	85.39	4.73	1.01	2.18	18.77	1.24
1	1	19	C/C	G/G	178	84	30.854	136	90	46.60	159.00	30.90	341.00	90.50	11.00	0.23	14.40	208.00	5.15	12.70	7.95	31.39	21.42	0.68	3.35	2.89	99.28	5.53	0.99	1.66	7.23	1.17
2	2	20	C/C	G/G	172	74	27.1809	110	60	41.30	138.00	30.50	334.00	91.40	11.10	0.27	14.20	242.00	4.52	12.70	5.69	12.01	12.97	1.08	4.21	4.10	73.84	5.02	1.47	2.24	7.77	1.13
1	1	19	A/A	A/A	168	71	26.079	124	70	45.80	158.00	33.20	345.00	96.20	10.30	0.22	13.80	214.00	4.76	12.30	5.51	14.06	17.75	1.26	4.49	3.66	86.96	5.28	0.93	2.17	14.82	2.86
2	2	19	A/A	A/A	169.5	97	35.629	120	80	32.70	100.00	21.30	306.00	69.70	10.90	0.49	14.10	450.00	4.69	16.90	9.52	22.36	18.33	0.82	2.95	3.91	75.14	6.14	0.90	2.75	4.60	0.53
1	2	21	A/A	A/A	183	78	28.6501	114	72	47.20	160.00	29.10	339.00	85.80	10.50	0.41	13.60	389.00	5.50	12.80	6.45	26.28	19.89	0.76	4.12	2.83	85.50	4.78	0.79	1.82	14.53	1.13
1	2	23	A/A	A/A	167	72	26.4463	122	78	46.10	156.00	26.40	338.00	78.00	11.90	0.27	15.70	228.00	5.91	13.40	6.59	19.06	18.69	0.98	5.04	5.52	87.88	4.79	1.19	3.86	12.01	0.96
2	2	20	A/C	A/G	167	72	26.4463	122	70	41.80	137.00	28.70	328.00	87.60	11.00	0.35	14.10	313.00	4.77	13.00	7.93	23.72	20.43	0.86	3.99	5.77	67.78	4.94	1.75	3.53	10.73	0.97
2	2	21	A/A	A/A	162	69	25.3444	124	80	40.60	138.00	28.50	340.00	83.90	12.20	0.39	16.10	316.00	4.84	13.30	9.03	12.64	14.03	1.11	4.22	2.85	80.71	5.34	1.09	1.59	12.78	0.60
1	2	24	A/A	A/A	165	72	26.4463	120	80	47.00	157.00	30.30	334.00	90.60	9.70	0.33	11.80	342.00	5.19	12.80	6.43	25.00	19.66	0.79	4.23	3.01	80.11	5.00	0.87	1.82	8.13	1.27
1	2	20	A/A	A/A	169	69	25.3444	112	70	48.00	166.00	30.70	346.00	88.90	10.70	0.32	13.90	301.00	5.40	12.40	8.92	20.48	15.47	0.76	4.04	3.24	77.53	5.21	0.98	2.02	10.73	0.84
2	2	19	A/C	G/G	172.5	74	27.1809	102	70	42.20	137.00	28.50	325.00	87.90	9.80	0.26	11.70	270.00	4.80	13.90	5.67	26.64	29.22	1.10	3.01	4.21	85.87	5.07	1.62	2.07	8.05	1.08
1	2	23	C/C	G/G	165	80	29.3848	130	80	47.10	158.00	28.50	335.00	85.00	11.90	0.35	16.20	297.00	5.54	13.60	8.93	125.73	54.33	0.43	4.96	6.39	106.51	5.33	0.91	4.47	7.94	3.49
1	2	23	A/A	A/A	171	70	25.7117	100	70	43.40	146.00	29.30	336.00	87.10	9.80	0.27	12.40	272.00	4.98	12.60	7.96	36.47	22.06	0.60	3.40	4.59	74.13	4.44	1.37	2.71	10.38	0.68
1	2	19	A/C	A/G	178	88	32.3232	136	82	45.60	153.00	29.80	336.00	88.90	10.40	0.33	12.80	313.00	5.13	14.10	5.59	36.46	52.14	1.43	2.15	3.28	77.53	5.01	1.10	1.97	12.92	1.20
1	2	21	A/A	A/A	189	70	25.7117	100	70	47.50	155.00	28.60	326.00	87.60	9.80	0.28	12.50	288.00	5.42	13.30	6.24	97.40	44.94	0.46	3.12	3.31	76.12	5.14	0.95	2.06	19.10	0.86
1	1	19	A/C	A/G	185	75	27.5482	122	74	47.60	162.00	31.40	340.00	92.20	12.60	0.25	18.90	200.00	5.16	12.40	8.68	14.54	13.85	0.95	2.93	3.68	83.59	5.39	1.38	2.00	10.48	0.79
1	2	20	A/A	A/A	180	82	30.1194	136	88	45.80	151.00	28.10	330.00	85.30	10.70	0.27	13.40	255.00	5.37	13.00	7.27	19.44	16.44	0.85	5.29	3.88	110.40	5.18	1.34	2.23	12.22	0.51
1	2	19	A/C	G/G	183	78	28.6501	126	72	50.90	171.00	28.50	336.00	84.80	11.10	0.28	14.50	256.00	6.00	14.00	8.57	19.10	15.91	0.83	5.15	4.63	83.68	5.44	1.39	2.90	11.83	0.80
1	1	19	C/C	G/G	169.5	103	37.8329	120	80	46.80	155.00	28.80	331.00	87.00	11.10	0.34	14.30	305.00	5.38	13.20	10.96	35.26	22.48	0.64	4.23	3.10	95.22	4.93	0.95	1.98	6.07	1.00
2	2	20	A/C	A/G	167.5	80	29.3848	120	80	40.20	128.00	26.90	318.00	84.50	12.00	0.41	17.00	341.00	4.76	14.40	6.91	8.90	13.21	1.48	3.02	4.22	91.08	5.24	1.42	2.44	12.67	1.12
1	1	19	A/C	A/G	176	84	30.854	110	80	47.60	160.00	29.50	336.00	87.70	10.80	0.28	13.70	259.00	5.43	13.20	6.00	23.95	15.45	0.65	3.85	3.73	102.28	5.36	1.49	2.02	12.37	0.73
1	2	23	A/C	A/G	180	74	27.1809	122	90	46.80	163.00	31.20	348.00	89.50	11.00	0.23	14.30	209.00	5.23	12.90	8.20	23.17	19.35	0.84	3.96	4.00	90.36	5.44	1.12	2.59	15.71	0.73
2	2	19	A/A	A/A	168.5	82	30.1194	112	74	43.60	146.00	29.10	335.00	87.00	10.50	0.37	13.60	353.00	5.01	13.10	7.57	19.29	13.72	0.71	4.31	5.01	74.84	5.02	1.14	3.58	7.28	0.74
1	2	25	A/A	A/A	172	80	29.3848	124	78	49.00	172.00	30.70	351.00	87.50	12.90	0.30	17.80	231.00	5.60	12.00	7.29	26.62	20.38	0.77	5.81	4.47	85.18	4.79	1.55	2.69	22.99	0.83
1	2	22	C/C	G/G	176	92	33.7925	150	120	45.40	156.00	29.60	344.00	86.10	9.80	0.33	11.90	341.00	5.27	12.60	7.04	31.04	25.46	0.82	4.37	3.46	88.50	5.97	1.28	1.97	12.38	0.70
1	2	19	A/A	A/A	175.7	100	36.7309	124	80	48.00	159.00	28.10	331.00	85.00	11.00	0.36	14.20	329.00	5.65	13.40	11.06	22.84	15.50	0.68	5.97	5.30	79.52	4.58	1.15	3.61	23.09	1.54
1	2	19	A/C	A/G	185	80	29.3848	120	70	46.50	156.00	28.40	335.00	84.70	10.80	0.26	14.00	237.00	5.49	13.10	6.77	16.47	16.12	0.98	4.31	3.96	88.43	4.78	1.19	2.49	9.05	0.50
1	1	18	A/C	A/G	183.4	79	29.0174	120	80	47.10	155.00	29.80	329.00	90.60	10.90	0.22	15.30	198.00	5.20	13.30	6.05	17.77	15.51	0.87	4.44	3.48	84.38	4.95	1.19	2.03	18.72	0.93
1	1	20	A/A	A/A	173	72	26.4463	110	60	43.70	139.00	19.00	318.00	59.90	10.80	0.34	13.50	316.00	7.30	19.90	7.92	51.16	26.27	0.51	3.60	3.65	114.28	5.55	1.09	2.24	12.11	1.01
1	2	22	A/A	A/A	172	70	25.7117	120	60	49.70	158.00	27.80	318.00	87.50	9.90	0.34	12.40	348.00	5.68	13.20	7.97	21.95	17.60	0.80	4.96	4.25	97.60	5.30	1.29	2.67	20.48	0.52
2	1	19	C/C	G/G	170	74	27.1809	100	60	42.50	137.00	30.00	322.00	93.00	11.80	0.34	15.00	288.00	4.57	12.50	5.09	17.14	15.51	0.90	2.74	3.76	67.37	5.10	1.86	1.64	11.13	0.53
1	2	19	A/A	A/A	171	75	27.5482	100	60	50.10	166.00	30.20	331.00	91.10	12.00	0.29	16.40	241.00	5.50	12.90	7.27	19.31	18.29	0.95	3.63	5.64	104.00	4.45	1.07	4.07	14.96	1.39
2	1	21	A/C	A/G	167	105	38.5675	130	90	43.70	142.00	27.40	325.00	84.40	10.40	0.31	13.30	297.00	5.18	13.70	8.38	19.74	15.25	0.77	3.77	4.28	65.65	5.35	1.17	2.73	18.03	1.05
1	1	20	A/C	A/G	167	73	26.8136	90	60	47.30	156.00	31.00	330.00	93.80	10.00	0.30	12.70	303.00	5.04	12.60	8.04	36.86	22.69	0.62	6.34	4.59	94.91	5.67	1.02	2.99	7.60	2.19
1	1	20	A/C	A/G	175	75	27.5482	120	80	49.70	164.00	30.10	330.00	91.20	11.20	0.26	14.60	233.00	5.45	12.70	6.07	39.61	23.94	0.60	4.74	4.27	105.51	5.06	1.17	2.75	14.01	0.78
1	1	20	A/C	A/G	190	82	30.1194	130	80	48.20	166.00	29.90	344.00	86.80	11.80	0.36	16.40	309.00	5.55	13.00	6.28	23.74	15.03	0.63	4.37	3.49	97.62	5.49	1.27	2.01	11.81	0.92
1	1	18	C/C	G/G	173	70	25.7117	120	60	45.20	154.00	31.80	341.00	93.20	11.50	0.28	15.10	240.00	4.85	11.90	4.95	25.13	29.78	1.19	6.50	4.73	96.98	5.05	1.24	3.02	13.45	0.94
1	1	18	A/A	A/A	181	100	36.7309	130	80	45.50	151.00	29.50	332.00	88.90	10.70	0.28	13.20	259.00	5.12	12.70	6.96	13.38	18.20	1.36	6.72	3.89	78.60	5.28	1.24	2.30	13.20	1.04
1	1	20	A/C	A/G	178	75	27.5482	110	70	48.70	163.00	29.70	335.00	88.70	11.90	0.27	16.30	227.00	5.49	13.80	5.29	23.16	17.67	0.76	4.76	4.77	79.86	5.31	1.21	2.99	16.00	1.53
1	1	19	A/C	A/G	172	75	27.5482	100	70	45.90	154.00	29.20	336.00	87.10	11.80	0.24	16.70	200.00	5.27	12.80	6.12	31.69	20.24	0.64	4.18	3.42	79.71	5.27	1.55	1.64	11.10	1.06
1	2	19	A/A	A/A	189	88	32.3232	120	80	49.20	167.00	29.20	339.00	86.20	10.00	0.34	12.20	337.00	5.71	13.80	7.31	23.68	14.01	0.59	3.50	3.42	97.78	5.60	1.20	1.96	13.89	0.58
2	2	19	A/C	A/G	175	70	25.7117	120	80	38.70	123.00	28.90	318.00	90.80	11.80	0.34	15.00	284.00	4.26	13.00	7.81	9.81	16.04	1.64	4.88	3.77	64.56	4.90	1.35	2.03	9.75	1.21
2	2	20	A/C	A/G	165	70	25.7117	120	70	30.60	86.00	20.70	281.00	73.60	10.10	0.38	12.00	377.00	4.16	18.20	4.26	18.45	18.58	1.01	4.48	3.92	70.12	5.37	2.02	1.56	9.96	0.48
1	3	21	A/A	A/A	185	90	33.0579	100	60	49.00	165.00	29.00	337.00	86.30	10.80	0.23	14.60	212.00	5.68	12.90	4.62	35.72	18.18	0.51	3.83	4.32	104.90	5.09	1.27	2.48	15.94	1.59
1	1	20	A/C	A/G	176	79	29.0174	138	80	47.70	161.00	29.40	338.00	87.00	10.90	0.36	14.50	331.00	5.48	13.20	7.47	26.06	22.61	0.87	7.31	3.85	99.17	5.79	1.26	2.22	14.67	0.81
1	1	19	A/A	A/A	174	77	28.2828	120	60	45.00	153.00	29.80	340.00	87.70	9.30	0.27	10.90	289.00	5.13	12.60	4.96	29.41	17.53	0.60	4.27	4.40	93.59	5.82	1.14	2.85	19.19	0.85
1	1	19	A/A	A/A	184	75	27.5482	120	70	46.40	155.00	31.10	334.00	93.20	10.60	0.28	13.10	269.00	4.98	12.90	5.51	15.40	17.83	1.16	3.21	4.96	81.63	4.86	1.85	2.89	19.29	0.63
2	2	21	A/A	A/A	157	71	26.079	90	60	44.40	143.00	27.30	322.00	84.90	9.60	0.32	11.30	336.00	5.23	13.40	9.25	21.48	16.92	0.79	4.77	3.90	86.41	5.32	0.98	2.76	8.81	1.14
2	1	20	A/A	A/A	164	76	27.9155	110	60	37.90	126.00	28.50	332.00	85.70	10.70	0.33	14.10	305.00	4.42	12.60	7.27	19.09	15.57	0.82	4.18	3.61	63.02	5.34	1.42	1.96	7.33	0.65
1	1	21	A/A	A/A	183	85	31.2213	120	80	49.50	159.00	27.90	321.00	87.00	12.90	0.16	22.40	127.00	5.69	13.50	5.39	30.51	18.36	0.60	4.33	3.93	105.84	5.48	1.20	2.40	16.46	1.25
1	2	21	A/C	A/G	172	83	30.4867	110	60	48.80	167.00	31.30	342.00	91.40	10.20	0.38	12.90	367.00	5.34	12.70	6.98	57.56	29.05	0.50	4.01	5.57	89.72	5.54	0.86	4.24	10.88	1.43
1	1	19	A/C	A/G	177	73	26.8136	120	70	47.30	161.00	29.70	340.00	87.30	11.20	0.25	15.30	226.00	5.42	12.90	9.72	20.31	15.03	0.74	4.77	4.05	97.94	4.84	1.38	2.47	15.77	1.10
1	1	21	C/C	G/G	173	71	26.079	100	60	50.10	176.00	32.60	351.00	92.80	11.00	0.37	14.50	338.00	5.40	12.60	7.77	16.57	15.97	0.96	3.21	4.27	93.75	5.44	1.05	2.95	34.91	1.17
2	2	19	A/C	A/G	174	80	29.3848	90	60	38.70	120.00	24.80	310.00	80.10	10.80	0.37	13.10	339.00	4.83	15.30	5.81	11.14	14.45	1.30	4.12	4.13	68.82	5.38	1.45	2.38	14.09	0.84
1	3	21	A/A	A/A	187	70	25.7117	120	70	44.10	148.00	27.70	336.00	82.60	9.90	0.22	12.40	221.00	5.34	13.00	4.65	22.35	24.11	1.08	4.88	3.51	85.65	4.54	1.26	1.97	24.49	0.83
1	2	20	A/A	A/A	175	69	25.3444	110	60	46.20	156.00	31.00	338.00	91.70	11.30	0.26	15.30	229.00	5.04	13.00	6.77	10.53	14.62	1.39	5.11	4.03	95.38	5.06	1.29	2.42	12.41	1.20
2	2	20	A/C	A/G	167	71	26.079	110	60	40.80	135.00	28.00	331.00	84.50	11.10	0.43	13.80	385.00	4.83	12.60	5.91	20.61	18.10	0.88	4.75	4.10	87.98	4.65	1.49	2.29	9.34	0.62
2	1	21	A/C	A/G	163	73	26.8136	100	60	41.60	138.00	30.50	332.00	91.80	11.00	0.34	14.30	309.00	4.53	12.00	4.95	13.50	19.96	1.48	5.00	4.54	73.69	5.03	1.72	2.36	12.55	1.36
2	1	19	A/C	A/G	164	70	25.7117	120	80	40.90	133.00	28.70	325.00	88.30	10.60	0.37	13.40	350.00	4.63	12.20	7.28	15.50	16.98	1.10	3.42	3.21	75.46	5.15	1.38	1.56	14.72	0.94
2	2	19	A/A	A/A	160	78	28.6501	120	70	35.70	110.00	23.50	308.00	76.30	11.70	0.42	15.50	361.00	4.68	14.90	6.80	12.34	10.57	0.86	3.70	3.59	67.11	5.01	1.01	2.27	10.28	0.87
2	1	20	A/C	A/G	165	69	25.3444	120	60	42.70	139.00	30.50	326.00	93.80	10.60	0.33	13.10	310.00	4.55	13.00	7.62	14.98	14.79	0.99	4.03	4.23	71.96	5.77	1.56	2.31	17.56	1.29
2	3	20	A/C	A/G	174	72	26.4463	90	60	39.40	127.00	29.50	322.00	91.60	11.20	0.46	14.10	408.00	4.30	13.30	7.77	10.80	13.85	1.28	4.78	3.44	57.28	5.27	1.21	1.98	11.81	0.82
2	1	19	A/C	A/G	172	70	25.7117	120	84	42.80	140.00	30.30	327.00	92.60	10.50	0.37	13.00	354.00	4.62	11.60	7.82	12.15	14.28	1.18	2.62	3.46	62.08	3.58	1.35	1.86	10.75	0.79
1	3	20	C/C	G/G	182	80	29.3848	100	60	45.40	156.00	30.60	344.00	89.00	10.10	0.40	12.60	392.00	5.10	12.30	5.88	13.87	18.32	1.32	3.29	2.95	84.13	5.22	1.01	1.66	7.61	1.00
2	1	19	A/C	A/G	163	73	26.8136	120	80	41.60	137.00	30.00	329.00	91.00	11.30	0.44	14.00	385.00	4.57	13.60	6.18	23.84	17.17	0.72	2.45	4.10	58.48	5.65	1.07	2.64	8.86	0.88
2	2	23	A/A	A/A	161	69	25.3444	100	60	38.50	121.00	26.00	314.00	82.60	11.60	0.38	14.40	326.00	4.66	14.90	8.45	15.79	14.68	0.93	3.57	4.46	76.02	4.75	1.60	2.44	7.92	1.02
2	2	19	C/C	G/G	163	78	28.6501	90	60	37.50	120.00	28.10	320.00	87.80	10.00	0.33	11.70	328.00	4.27	13.60	5.50	11.56	16.55	1.43	4.06	3.76	74.87	4.67	1.55	1.92	11.38	0.94
1	1	19	C/C	G/G	173	71	26.079	120	70	50.30	166.00	30.30	330.00	91.80	10.80	0.25	13.70	233.00	5.48	12.00	8.57	17.87	24.59	1.38	3.47	4.33	106.75	4.80	1.37	2.83	15.02	0.89
1	1	19	A/A	A/A	175	74	27.1809	110	60	47.10	158.00	29.90	335.00	89.20	13.40	0.31	20.90	228.00	5.28	13.00	9.80	16.74	19.35	1.16	3.28	4.45	81.57	5.02	1.52	2.57	10.22	1.12
1	1	20	C/C	G/G	178	75	27.5482	100	60	47.20	158.00	30.40	335.00	90.80	10.90	0.26	14.20	236.00	5.20	12.80	6.13	10.29	13.49	1.31	6.62	3.28	88.69	5.21	1.33	1.71	6.88	0.96
1	1	21	A/A	A/A	181	84	30.854	130	80	49.60	169.00	31.20	341.00	91.50	9.60	0.27	12.00	277.00	5.42	11.60	9.29	13.47	14.82	1.10	4.08	4.47	87.95	5.14	1.26	2.82	12.85	1.11
1	1	21	A/C	A/G	179	73	26.8136	130	80	47.80	159.00	29.60	333.00	89.00	9.60	0.26	12.40	269.00	5.37	12.60	5.19	17.36	16.96	0.98	4.29	3.95	90.77	5.03	1.40	2.23	13.60	0.91
1	2	20	A/C	A/G	176	85	31.2213	110	60	49.40	173.00	28.60	350.00	81.80	11.30	0.28	15.50	246.00	6.04	13.20	6.05	53.12	23.23	0.44	6.23	5.87	93.09	5.26	1.03	4.09	21.46	2.43
1	2	19	A/A	A/A	170	75	27.5482	120	60	45.60	153.00	30.50	336.00	90.80	11.70	0.29	15.50	244.00	5.02	13.50	8.39	20.22	15.52	0.77	3.85	4.61	78.12	5.19	0.97	3.24	14.79	1.86
2	1	22	A/C	A/G	165	69	25.3444	110	60	38.30	125.00	28.10	326.00	86.10	10.80	0.31	12.70	292.00	4.45	12.90	5.50	21.83	18.83	0.86	3.65	3.11	57.24	5.14	1.07	1.78	8.59	0.94
1	2	19	A/A	A/A	176	79	29.0174	120	60	49.00	165.00	28.40	337.00	84.50	9.50	0.33	11.80	351.00	5.80	12.90	8.01	13.82	12.90	0.93	4.82	3.78	103.72	5.56	1.23	2.26	16.70	0.85
1	5	22	A/C	A/G	175	70	25.7117	100	70	49.20	163.00	31.60	331.00	95.30	12.90	0.26	18.10	201.00	5.16	12.20	7.52	20.46	21.76	1.06	6.99	3.88	84.56	4.25	0.82	2.80	10.78	0.59
2	1	19	A/C	A/G	172	70	25.7117	100	60	40.10	134.00	30.20	334.00	90.30	11.00	0.30	13.60	271.00	4.44	12.50	6.21	10.61	14.05	1.32	3.52	4.28	73.86	5.35	1.54	2.47	15.16	0.77
1	4	20	A/A	A/A	186	76.3	28.0257	120	78	51.20	176.00	29.80	344.00	86.80	10.00	0.28	11.90	276.00	5.90	13.20	6.90	27.75	33.66	1.21	3.43	5.43	100.83	5.27	1.08	3.61	23.69	2.18
1	1	19	A/C	A/G	178	72	26.4463	130	80	43.30	143.00	28.40	330.00	85.90	9.30	0.27	10.60	293.00	5.04	13.20	6.23	22.11	16.44	0.74	4.14	3.81	82.61	5.22	1.51	2.05	13.12	0.92
1	1	20	A/A	A/A	190	86	31.5886	110	60	47.90	161.00	29.80	336.00	88.70	10.50	0.28	13.60	263.00	5.40	12.70	7.84	15.82	16.34	1.03	3.62	3.49	91.15	5.23	1.22	2.02	27.43	0.72
1	1	19	A/A	A/A	178	76	27.9155	110	60	51.00	170.00	30.80	333.00	92.40	11.30	0.28	14.90	247.00	5.52	12.50	5.68	15.62	14.17	0.91	4.06	3.75	83.58	4.94	1.28	2.16	16.63	1.60
2	1	20	A/C	A/G	165	73	26.8136	100	60	41.30	139.00	30.70	337.00	91.20	11.20	0.25	14.50	222.00	4.53	12.40	4.42	21.64	14.98	0.69	4.01	3.02	58.69	4.77	1.27	1.59	22.20	0.61
2	1	19	A/A	A/A	160	86	31.5886	100	60	43.50	145.00	29.90	333.00	89.70	10.90	0.36	13.80	334.00	4.85	12.50	8.78	64.79	57.60	0.89	3.67	3.49	77.01	5.34	0.95	2.19	20.82	1.27
1	1	19	A/A	A/A	187	88	32.3232	120	60	44.80	148.00	28.90	330.00	87.50	9.40	0.40	11.50	426.00	5.12	13.40	7.22	14.89	14.32	0.96	4.19	3.42	71.12	4.96	1.15	1.95	19.76	0.99
1	2	20	A/A	A/A	179	74	27.1809	120	60	47.00	158.00	30.90	336.00	92.00	11.10	0.34	14.50	304.00	5.11	12.80	6.44	20.48	16.30	0.80	4.62	4.08	88.36	5.31	1.17	2.51	15.28	1.58
1	1	21	C/C	G/G	171	70	25.7117	100	60	50.20	168.00	28.60	335.00	85.50	10.10	0.22	13.20	220.00	5.87	12.90	6.12	24.94	19.78	0.79	3.86	4.56	86.83	5.29	1.15	3.03	16.19	1.83
1	1	19	A/C	A/G	190	106	38.9348	130	80	47.20	154.00	29.20	326.00	89.40	10.90	0.37	14.10	343.00	5.28	12.80	7.13	32.77	17.91	0.55	3.47	4.65	84.39	9.17	1.13	3.00	13.63	1.83
2	1	19	A/C	A/G	165	70	25.7117	90	60	41.80	142.00	28.70	340.00	84.60	11.00	0.35	14.90	322.00	4.94	12.80	7.55	55.63	38.92	0.70	5.77	4.65	99.56	4.78	0.85	3.00	7.63	2.60
2	3	20	A/C	A/G	182	90	33.0579	120	60	42.80	140.00	28.90	327.00	88.40	10.70	0.39	14.30	369.00	4.84	13.00	7.93	18.14	23.63	1.30	2.65	4.11	66.17	5.48	1.13	2.47	25.52	1.67
2	1	19	A/A	A/A	160	70	25.7117	100	60	40.60	132.00	29.40	325.00	90.40	11.60	0.39	16.00	337.00	4.49	13.20	6.78	19.37	16.05	0.83	2.76	3.62	72.21	5.21	1.08	2.10	15.27	1.46
2	1	23	C/C	G/G	176	70	25.7117	110	60	40.90	136.00	29.80	333.00	89.50	10.60	0.29	13.20	279.00	4.57	13.00	5.97	24.97	24.62	0.99	4.07	3.88	71.75	5.69	1.34	2.23	15.95	0.75
2	1	21	A/C	A/A	160	70	25.7117	110	80	41.30	134.00	28.30	324.00	87.30	9.10	0.32	10.90	352.00	4.73	12.60	5.16	75.65	43.84	0.58	3.24	4.50	70.51	6.10	1.32	2.95	9.25	0.76
1	2	24	A/C	A/G	176	70	25.7117	132	90	48.50	166.00	29.30	342.00	85.50	11.50	0.29	15.70	247.00	5.67	12.40	6.04	61.64	34.09	0.55	4.27	5.24	90.95	5.42	1.38	3.40	9.82	1.68
1	2	23	A/A	A/A	181	74	27.1809	124	86	48.20	162.00	28.50	336.00	84.90	11.60	0.28	15.00	237.00	5.68	12.70	6.58	21.55	20.38	0.95	4.10	4.28	96.49	6.00	1.22	2.79	7.39	1.96
1	1	21	A/C	A/G	183	72	26.4463	130	60	46.00	151.00	30.90	328.00	94.30	11.60	0.28	15.50	241.00	4.88	12.80	7.43	12.74	18.70	1.47	5.97	3.13	88.21	5.34	1.20	1.64	6.50	0.80
1	1	22	A/A	A/A	179	74.5	27.3646	120	80	45.20	152.00	31.40	336.00	93.40	11.30	0.28	15.50	244.00	4.84	13.40	8.62	26.09	20.57	0.79	4.48	3.32	112.94	5.22	1.26	1.85	26.15	0.79
1	1	22	A/C	A/G	176	68.5	25.1607	120	80	46.50	145.00	21.80	312.00	70.00	9.30	0.30	11.30	321.00	6.64	15.10	10.24	69.03	38.57	0.56	4.98	4.68	100.42	5.70	1.84	2.41	25.46	1.19
1	1	19	A/C	A/G	178	121.5	44.6281	120	70	45.70	151.00	28.80	330.00	87.00	9.90	0.35	12.50	352.00	5.25	13.30	10.29	93.64	46.59	0.50	3.60	4.11	90.58	5.49	1.05	2.62	9.70	1.66
2	2	22	A/C	A/G	160	70	25.7117	110	60	35.30	115.00	28.60	326.00	87.80	10.30	0.42	13.20	411.00	4.02	13.00	8.01	13.90	21.71	1.56	4.44	3.26	76.43	5.18	1.02	2.03	5.40	0.72
1	1	21	A/A	A/A	185	90	33.0579	122	80	48.80	164.00	28.70	336.00	85.30	11.00	0.28	13.10	257.00	5.72	13.60	7.66	18.09	14.74	0.81	3.90	3.18	98.68	5.73	0.91	1.94	16.67	1.23
1	1	22	A/C	A/G	168	73.5	26.9972	110	60	44.10	148.00	29.20	336.00	87.20	10.50	0.27	13.80	252.00	5.06	13.20	5.70	37.19	19.92	0.54	5.32	4.79	89.00	5.56	0.80	3.27	9.07	2.63
1	2	23	A/C	A/G	186	93.3	34.27	122	80	41.30	138.00	28.70	334.00	85.90	9.10	0.27	10.90	292.00	4.81	12.80	10.09	14.20	18.10	1.27	6.38	3.73	97.63	4.83	0.83	2.10	11.02	3.41
2	1	22	A/A	A/A	171	75	27.5482	112	70	43.00	143.00	27.30	333.00	82.10	11.00	0.30	13.30	271.00	5.24	14.50	5.60	12.40	16.22	1.31	4.67	4.75	72.90	5.14	1.46	2.95	10.52	0.76
2	1	21	A/C	A/G	168	80	29.3848	110	70	42.40	141.00	29.70	333.00	89.50	11.10	0.20	12.90	132.00	4.74	12.50	6.36	14.12	19.58	1.39	5.32	4.86	77.40	5.31	1.24	3.15	16.59	1.07
2	1	22	A/A	A/A	170	68.4	25.124	130	70	43.10	139.00	30.00	323.00	92.90	11.10	0.36	13.50	326.00	4.64	12.60	10.09	37.84	20.03	0.53	3.70	3.78	72.40	6.19	1.03	2.48	12.45	0.85
1	2	24	A/C	A/G	177	71	26.079	104	60	46.80	156.00	28.50	333.00	85.40	12.60	0.25	18.50	201.00	5.48	13.50	9.70	14.96	13.99	0.94	3.98	3.37	88.22	5.18	1.21	1.94	12.05	0.77
1	1	21	C/C	G/G	175	70	25.7117	134	94	43.00	146.00	30.00	340.00	88.50	11.40	0.20	14.90	173.00	4.86	12.50	5.41	19.77	21.72	1.10	3.62	3.37	86.03	5.58	1.40	1.85	20.27	0.80
1	1	20	A/A	A/A	173	90	33.0579	120	70	48.00	166.00	30.20	346.00	87.40	9.70	0.24	11.60	245.00	5.49	11.70	5.57	22.12	24.24	1.10	3.71	4.32	99.10	5.73	0.91	2.93	17.24	1.96
1	1	23	A/A	A/A	167	68.5	25.1607	110	70	47.30	160.00	30.10	338.00	89.10	9.90	0.26	12.20	261.00	5.31	11.80	5.01	18.22	20.47	1.12	5.13	3.70	92.95	5.63	1.12	2.27	12.51	1.25
1	1	22	A/C	A/G	176	71	26.079	110	70	48.30	165.00	29.80	342.00	87.20	9.20	0.24	11.10	258.00	5.54	12.80	5.68	11.53	18.69	1.62	3.11	3.23	78.14	5.73	1.49	1.48	14.90	0.77
1	1	23	C/C	G/G	176	87.5	32.1396	120	80	45.50	149.00	28.70	327.00	87.70	9.30	0.22	11.20	234.00	5.19	12.60	7.32	23.31	14.43	0.62	4.75	3.54	77.63	4.97	1.32	2.03	7.77	1.14
1	1	22	A/C	A/G	177	97	35.629	120	80	48.00	159.00	28.40	331.00	85.70	10.20	0.37	12.60	360.00	5.60	13.20	8.07	31.39	28.01	0.89	4.82	4.89	108.84	5.73	1.31	3.09	7.48	2.41
1	3	21	A/C	A/G	180	83.5	30.6703	130	90	47.90	153.00	27.20	319.00	85.10	11.70	0.37	14.10	315.00	5.63	14.30	8.93	15.69	21.12	1.35	4.49	3.47	79.45	5.21	1.28	1.96	9.44	0.73
1	1	22	A/C	A/G	183	86	31.5886	130	80	50.90	165.00	29.80	324.00	92.00	13.40	0.24	22.20	176.00	5.53	13.10	7.69	13.10	15.28	1.17	4.28	3.49	94.21	4.71	1.38	1.91	12.83	0.57
1	1	22	C/C	G/G	177	72	26.4463	120	60	47.60	154.00	30.20	324.00	93.30	10.40	0.24	13.00	231.00	5.10	12.20	7.80	34.65	20.95	0.60	4.76	4.21	107.22	5.58	2.17	1.84	12.77	0.61
1	2	22	A/A	A/A	175	80	29.3848	120	70	48.10	166.00	29.70	345.00	86.00	9.60	0.33	12.20	347.00	5.59	12.90	6.04	42.89	18.74	0.44	5.14	3.37	83.78	5.07	0.94	2.12	6.34	1.38
1	1	21	A/C	A/G	185	105.5	38.7511	128	84	47.80	161.00	31.30	337.00	92.80	12.90	0.29	18.10	226.00	5.15	12.00	5.28	25.64	23.72	0.93	4.15	4.25	97.57	4.86	1.36	2.68	17.71	0.82
2	1	20	A/A	A/A	166	68.5	25.1607	110	70	43.30	141.00	28.60	326.00	87.80	12.00	0.33	17.10	271.00	4.93	12.60	7.24	11.85	13.76	1.16	6.64	4.54	76.52	4.93	1.14	3.12	11.22	0.82
1	3	22	C/C	G/G	182	96	35.2617	100	60	49.20	156.00	29.20	317.00	92.10	11.50	0.28	14.60	242.00	5.34	12.70	4.34	18.26	19.01	1.04	5.39	3.63	83.34	4.94	1.24	2.21	6.99	0.67
1	1	22	A/C	A/G	185	125	45.9137	130	90	51.60	170.00	29.30	329.00	89.00	11.30	0.33	14.90	294.00	5.80	13.20	8.80	23.38	21.46	0.92	6.33	6.19	105.85	5.85	1.04	4.11	9.57	2.22
1	1	20	A/C	A/G	170	73	26.8136	120	80	46.90	158.00	28.50	337.00	84.50	10.30	0.26	12.90	256.00	5.55	12.50	6.39	15.21	13.92	0.92	5.53	3.62	85.04	5.24	1.25	2.02	13.74	0.89
1	1	22	A/A	A/A	181	80	29.3848	114	78	48.00	163.00	29.50	340.00	86.80	12.10	0.27	16.30	226.00	5.53	12.60	8.00	22.34	18.03	0.81	4.73	5.75	104.06	5.78	1.13	4.12	12.95	1.04
1	1	22	A/C	A/G	176	78.5	28.8338	120	80	47.60	168.00	30.60	353.00	86.70	10.00	0.35	12.30	353.00	5.49	13.60	7.37	47.78	25.61	0.54	6.80	5.27	105.03	5.46	1.30	3.54	21.31	1.48
2	2	23	A/A	A/A	161	82	30.1194	110	60	41.20	137.00	30.90	333.00	92.80	11.50	0.26	14.20	230.00	4.44	12.60	7.56	10.86	15.71	1.45	3.91	4.58	64.24	5.57	1.97	2.21	8.11	0.76
1	1	21	A/C	A/G	181	77	28.2828	124	70	47.40	155.00	28.20	327.00	86.20	10.60	0.34	13.20	321.00	5.50	12.50	5.81	12.84	14.01	1.09	5.30	3.97	85.88	4.73	1.58	2.11	13.73	0.84
1	1	21	A/A	A/A	182	86.5	31.7723	120	80	50.20	169.00	31.70	337.00	94.20	12.00	0.27	17.70	229.00	5.33	12.10	8.14	23.87	32.80	1.37	5.99	4.40	97.35	4.36	1.43	2.52	24.08	1.58
1	2	21	A/A	A/A	167	80.5	29.5684	120	80	48.00	163.00	30.10	340.00	88.70	11.00	0.27	14.30	242.00	5.41	12.80	7.34	32.23	25.71	0.80	5.57	3.81	104.71	5.75	1.29	2.32	9.92	0.66
1	1	22	A/C	A/G	173	72	26.4463	90	60	46.40	154.00	28.60	332.00	86.10	10.70	0.36	13.20	335.00	5.39	13.20	8.21	30.73	20.46	0.67	4.99	3.32	78.45	5.45	1.12	1.96	8.68	0.69
2	2	23	C/C	G/G	148	69	25.3444	120	80	40.40	131.00	26.60	324.00	81.90	11.40	0.32	15.20	280.00	4.93	14.10	8.95	13.38	14.75	1.10	5.45	3.58	66.53	4.63	0.95	2.40	6.55	0.75
1	1	21	A/A	A/A	178	75	27.5482	120	70	50.10	166.00	30.50	331.00	91.90	12.00	0.34	15.20	281.00	5.45	12.80	7.40	16.77	16.10	0.96	5.61	3.93	110.29	5.04	1.57	2.04	16.92	0.85
1	1	27	A/C	A/G	180	73.3	26.9238	120	70	46.90	155.00	28.50	330.00	86.20	10.80	0.28	13.70	257.00	5.44	13.30	8.93	21.96	21.08	0.96	8.82	5.38	117.12	4.73	1.95	3.02	13.18	0.71
1	1	19	C/C	G/G	178	71	26.079	120	80	46.40	157.00	30.30	338.00	89.60	10.00	0.31	12.90	312.00	5.18	12.10	7.66	27.51	16.33	0.59	5.77	3.29	96.59	4.98	0.99	1.88	14.28	1.69
1	1	21	A/A	A/A	165	76.5	28.0992	120	60	50.00	172.00	29.20	344.00	84.70	9.60	0.34	11.30	356.00	5.90	13.30	7.12	33.79	18.94	0.56	5.66	3.50	103.18	5.74	1.03	2.19	17.01	1.17
1	2	21	A/C	A/G	185	87.2	32.0294	100	70	49.80	172.00	29.30	345.00	84.70	12.50	0.34	17.30	275.00	5.88	13.20	6.65	33.39	21.93	0.66	5.28	4.25	97.86	5.35	1.06	2.74	9.81	2.01
1	1	23	A/C	A/G	176	103.5	38.0165	130	86	46.30	155.00	30.80	335.00	92.00	12.00	0.37	16.40	306.00	5.03	12.40	9.57	20.71	15.84	0.76	4.42	4.37	81.46	5.21	0.94	2.80	23.67	2.32
2	1	21	A/A	A/A	173	73	26.8136	140	100	42.50	142.00	28.80	334.00	86.20	10.90	0.38	13.60	346.00	4.93	12.40	12.03	12.72	13.02	1.02	3.11	4.95	66.70	4.81	1.43	2.60	6.66	4.37
1	1	22	A/A	A/A	176	76.7	28.1726	122	70	41.00	131.00	19.40	320.00	60.60	12.50	0.33	14.90	263.00	6.77	16.20	7.96	18.17	16.68	0.92	3.68	4.24	87.80	4.77	0.91	2.75	26.83	1.67
1	1	20	A/A	A/A	180	71	26.079	130	70	48.70	161.00	29.30	331.00	88.50	13.00	0.23	17.70	178.00	5.50	11.90	4.87	25.47	18.94	0.74	4.82	4.79	86.68	4.96	1.33	2.90	24.55	1.20
1	2	21	A/A	A/A	183	70	25.7117	120	80	47.50	166.00	30.70	349.00	88.00	12.50	0.25	18.30	201.00	5.40	12.60	5.80	14.23	13.02	0.91	6.99	3.52	107.45	6.20	1.40	1.97	14.69	0.72
1	1	21	A/A	A/A	178	78	28.6501	100	70	45.80	160.00	31.10	349.00	88.90	9.50	0.26	11.80	272.00	5.15	12.00	6.64	47.46	24.82	0.52	4.77	3.62	97.07	4.93	1.30	1.98	15.56	1.00
1	2	21	A/C	A/G	170	93	34.1598	114	70	44.30	146.00	26.40	330.00	80.30	9.90	0.33	12.40	332.00	5.52	14.10	7.20	41.12	19.38	0.47	6.29	5.03	93.27	5.74	1.11	3.46	8.60	1.53
1	1	24	C/C	G/G	175	72	26.4463	124	70	49.60	171.00	28.60	345.00	82.90	11.00	0.28	14.10	259.00	5.98	12.80	6.02	14.70	18.24	1.24	7.67	3.52	92.01	5.13	1.15	2.07	11.78	0.98
1	1	21	C/C	G/G	181	83	30.4867	120	70	49.10	167.00	31.00	340.00	91.30	12.50	0.29	18.80	235.00	5.38	12.40	7.78	20.86	15.66	0.75	4.14	3.46	80.87	5.06	1.16	1.97	10.12	0.99
1	1	22	A/A	A/A	185	74	27.1809	120	80	50.90	167.00	30.10	328.00	91.90	11.70	0.27	16.60	233.00	5.54	13.20	6.65	33.92	23.24	0.69	4.92	5.09	101.90	5.54	1.08	3.37	10.50	2.24
2	1	20	A/C	A/G	170	70	25.7117	120	70	41.40	134.00	30.20	324.00	93.20	12.20	0.36	16.20	296.00	4.44	12.70	6.47	27.84	23.31	0.84	5.14	4.57	81.82	4.38	1.52	2.72	11.35	0.69
2	1	20	A/A	A/A	168	75	27.5482	110	70	42.30	144.00	29.80	340.00	87.60	11.50	0.34	15.50	296.00	4.83	12.30	6.37	241.38	73.55	0.30	5.25	6.34	61.04	5.41	1.26	3.90	9.32	3.21
2	1	20	C/C	G/G	160	80	29.3848	110	60	44.40	150.00	30.70	338.00	90.80	11.20	0.37	14.60	327.00	4.89	11.90	8.32	32.10	19.00	0.59	5.76	3.34	74.03	5.45	1.41	1.78	5.99	0.69
2	1	21	A/A	A/A	175	68.9	25.3076	128	70	40.60	134.00	30.50	330.00	92.30	10.70	0.26	13.70	244.00	4.40	12.30	8.01	10.30	13.45	1.31	9.67	4.25	82.96	5.10	1.48	2.46	11.03	0.64
2	1	21	A/C	A/G	168	76	27.9155	90	60	40.90	135.00	31.30	330.00	94.90	12.40	0.26	17.00	209.00	4.31	12.80	5.77	8.12	13.04	1.61	3.27	4.13	64.49	4.53	1.50	2.32	18.54	0.79
2	1	21	A/A	A/A	176	94	34.5271	134	90	45.60	151.00	30.20	331.00	91.20	9.70	0.27	11.80	277.00	5.00	12.30	8.81	19.17	17.89	0.93	6.77	3.99	76.71	4.91	1.31	2.25	10.74	1.51
1	1	20	A/C	A/G	183	69.7	25.6015	100	60	45.20	147.00	29.30	325.00	90.00	10.60	0.29	12.70	273.00	5.02	12.00	5.91	11.84	14.45	1.22	4.60	4.53	97.21	5.17	1.62	2.48	11.31	1.29
1	1	22	A/A	A/A	178	73	26.8136	100	60	49.90	175.00	29.80	351.00	84.90	11.60	0.28	15.60	240.00	5.88	13.00	8.75	32.04	38.50	1.20	4.63	3.52	104.65	5.48	1.04	2.04	16.88	1.66
1	3	22	A/A	A/A	187	78	28.6501	110	60	44.90	152.00	29.00	339.00	85.50	13.10	0.29	18.50	219.00	5.25	12.90	6.87	17.05	18.65	1.09	7.05	3.43	92.50	4.96	1.26	1.86	15.87	0.89
2	1	22	A/A	A/A	178	82.2	30.1928	114	70	43.50	144.00	27.50	331.00	83.20	11.20	0.29	14.00	262.00	5.23	13.50	8.96	13.32	16.18	1.21	4.63	4.01	99.77	4.71	1.18	2.48	11.27	1.08
1	2	21	A/A	A/A	173	90	33.0579	120	80	48.90	167.00	28.30	342.00	82.70	11.80	0.31	16.40	262.00	5.91	13.80	7.84	14.00	14.64	1.05	4.65	4.10	107.13	5.13	0.76	2.61	28.65	3.23
1	1	20	A/C	A/G	168	70	25.7117	120	70	46.00	150.00	30.30	326.00	92.90	11.60	0.30	15.00	259.00	4.95	13.30	6.36	14.54	16.28	1.12	4.91	3.54	87.70	5.28	1.72	1.50	10.61	0.73
2	1	21	C/C	G/G	162	70.5	25.8953	120	80	39.30	128.00	29.50	326.00	90.60	10.10	0.30	12.00	299.00	4.34	12.40	8.63	11.36	14.44	1.27	4.26	4.05	87.07	4.56	1.69	1.89	15.49	0.74
1	1	20	A/C	A/G	178	78	28.6501	110	70	53.00	176.00	28.10	332.00	84.50	11.00	0.35	13.70	314.00	6.27	13.10	8.41	23.67	17.31	0.73	5.54	3.27	109.99	4.38	1.21	1.84	19.01	0.83
1	1	21	A/C	A/G	185	70	25.7117	130	90	47.80	157.00	29.60	328.00	90.20	10.50	0.22	12.80	207.00	5.30	13.10	6.63	13.64	15.82	1.16	3.94	4.09	87.38	4.72	1.43	2.33	11.46	0.71
1	1	23	A/C	A/G	178.5	69.5	25.528	120	80	49.60	166.00	32.20	335.00	96.30	12.50	0.27	17.80	219.00	5.15	12.90	5.29	45.36	30.11	0.66	5.09	5.17	116.87	4.54	1.27	3.37	16.32	2.02
1	1	23	C/C	G/G	183	83.5	30.6703	120	70	49.20	164.00	30.10	333.00	90.30	9.60	0.26	11.70	268.00	5.45	12.60	4.78	39.94	17.02	0.43	5.78	4.70	97.17	5.11	1.45	3.20	15.75	0.87
1	2	21	A/C	A/G	181	68.1	25.0138	120	74	47.60	166.00	30.40	349.00	87.20	10.00	0.31	12.10	311.00	5.46	12.50	3.47	13.74	21.57	1.57	4.56	3.35	100.16	5.60	1.48	1.62	15.32	0.64
1	1	21	A/C	A/G	178	70	25.7117	114	70	49.20	173.00	29.90	352.00	85.10	10.30	0.28	12.10	275.00	5.78	12.70	4.88	18.24	18.71	1.03	6.00	3.49	89.20	4.28	1.06	2.07	31.60	0.89
1	1	20	A/A	A/A	172	75	27.5482	120	78	47.30	171.00	31.50	362.00	87.30	11.20	0.29	14.60	257.00	5.42	11.80	5.57	32.56	19.84	0.61	5.31	3.91	102.92	4.43	1.20	2.40	18.27	0.74
1	1	21	A/C	A/G	182	90	33.0579	114	70	50.40	168.00	28.40	333.00	85.30	11.90	0.29	16.10	243.00	5.91	12.90	6.79	29.61	22.97	0.78	4.97	4.59	110.74	5.45	1.18	3.02	15.13	1.41
2	1	21	A/C	A/G	160	70	25.7117	120	70	40.40	134.00	30.50	332.00	91.80	10.60	0.39	13.30	373.00	4.40	12.30	9.21	20.90	23.42	1.12	5.06	4.39	83.25	4.41	1.44	2.46	12.85	0.92
2	1	20	A/C	A/G	174	101.5	37.2819	160	100	44.00	147.00	27.70	334.00	82.90	11.40	0.36	14.70	320.00	5.31	12.60	9.36	93.17	33.44	0.36	4.20	5.67	78.96	4.59	1.33	3.74	6.51	1.91
2	1	22	A/A	A/A	162	69	25.3444	120	80	44.00	145.00	30.60	330.00	92.80	10.40	0.30	13.10	291.00	4.74	12.20	7.66	10.33	18.60	1.80	3.86	5.40	86.08	4.33	1.16	3.39	8.73	2.30
2	1	21	C/C	G/G	170	88	32.3232	120	74	44.90	150.00	30.20	334.00	90.50	12.60	0.29	18.00	233.00	4.96	13.40	7.58	26.36	15.14	0.57	3.69	4.10	86.20	5.08	1.02	2.44	7.97	2.50
2	1	22	A/C	A/G	171	87	31.9559	130	88	40.20	135.00	28.90	336.00	86.10	12.70	0.26	18.60	204.00	4.67	12.50	8.12	33.65	19.93	0.59	7.33	4.85	73.06	4.88	1.32	3.16	23.24	0.88
1	1	20	C/C	G/G	183	98	35.9963	128	90	46.60	159.00	28.60	341.00	84.00	10.70	0.24	13.30	226.00	5.55	12.80	7.91	32.65	21.62	0.66	4.94	3.64	97.22	4.46	0.83	2.40	11.03	1.26
2	1	21	A/A	A/A	172	79.3	29.1276	120	80	42.70	148.00	29.70	347.00	85.70	10.40	0.24	12.30	235.00	4.98	12.30	7.88	11.24	17.79	1.58	4.11	3.30	78.98	4.77	1.52	1.66	21.35	0.70
1	1	20	C/C	G/G	185	75	27.5482	120	80	47.90	159.00	29.90	332.00	90.00	12.80	0.25	19.10	195.00	5.32	13.10	6.28	13.32	17.76	1.33	3.39	3.51	105.64	5.15	1.47	1.67	12.89	0.93
2	1	22	A/C	A/G	163	82	30.1194	120	78	40.60	136.00	28.50	335.00	84.90	10.30	0.29	12.50	284.00	4.78	12.40	6.25	11.60	13.51	1.16	4.48	4.51	74.99	5.30	1.27	2.81	9.68	0.79
2	3	20	A/A	A/A	162	90	33.0579	130	80	45.00	148.00	27.90	329.00	84.90	11.40	0.50	15.40	439.00	5.30	13.70	9.79	30.46	21.79	0.72	4.06	3.86	66.54	5.29	1.06	2.40	6.98	1.33
1	1	21	A/A	A/A	172	73	26.8136	120	70	49.90	168.00	29.90	337.00	88.80	9.40	0.27	11.00	285.00	5.62	11.90	7.82	32.76	22.70	0.69	4.44	4.72	87.80	5.34	1.43	2.90	14.13	1.53
1	1	23	A/C	A/G	170	79	29.0174	100	70	51.10	166.00	29.30	325.00	90.30	12.60	0.25	17.10	195.00	5.66	14.00	6.46	45.88	24.59	0.54	5.93	4.29	91.52	5.88	1.39	2.47	11.13	1.01
1	1	22	A/A	A/A	170	72	26.4463	120	70	45.70	156.00	31.10	341.00	91.20	10.60	0.36	13.10	338.00	5.01	11.60	5.19	21.59	19.41	0.90	3.48	3.80	81.53	5.59	0.92	2.27	14.06	2.42
1	2	21	A/C	A/G	183	86	31.5886	130	70	45.90	153.00	29.60	333.00	88.80	12.30	0.23	18.50	191.00	5.17	12.90	7.32	8.35	16.47	1.97	4.01	3.50	79.95	4.93	0.94	2.23	12.49	0.82
1	1	21	A/A	A/A	173	70	25.7117	110	70	46.80	153.00	30.40	327.00	93.00	10.80	0.24	14.10	220.00	5.03	11.80	7.35	18.14	14.65	0.81	3.77	5.43	91.63	4.69	1.26	3.68	12.68	1.39
1	2	22	A/A	A/A	178	75	27.5482	110	70	41.20	142.00	29.70	345.00	86.20	9.60	0.25	11.40	265.00	4.78	13.70	9.87	50.68	29.75	0.59	6.10	4.32	98.58	5.23	0.88	2.96	11.39	1.86
1	2	21	A/A	A/A	183	78	28.6501	100	64	46.80	155.00	29.50	331.00	89.00	9.80	0.31	12.40	321.00	5.26	12.80	9.08	14.24	17.69	1.24	4.22	3.84	87.53	4.93	1.23	2.14	12.09	1.55
1	2	22	A/C	A/G	189	77	28.2828	110	70	44.10	147.00	28.40	333.00	85.10	11.20	0.30	14.60	270.00	5.18	13.70	8.79	11.64	20.66	1.77	4.52	2.88	85.79	5.35	1.30	1.43	18.96	0.57
1	2	23	A/C	A/G	179	69	25.3444	110	70	47.60	156.00	28.60	328.00	87.30	10.00	0.25	12.60	244.00	5.45	13.20	6.63	39.10	90.03	2.30	6.38	3.96	98.42	5.16	1.20	2.25	18.99	1.16
1	1	22	A/A	A/A	173	75	27.5482	130	80	47.10	161.00	28.70	342.00	84.00	10.90	0.36	15.00	334.00	5.61	13.10	8.85	92.57	41.88	0.45	4.14	3.99	76.78	5.10	1.25	2.58	25.37	0.95
1	1	21	A/C	A/G	178	70	25.7117	110	70	48.60	163.00	30.50	335.00	91.00	11.80	0.35	16.70	296.00	5.34	12.60	6.56	16.99	15.82	0.93	4.35	4.35	84.77	6.17	1.15	2.82	22.32	1.14
1	2	23	A/C	A/G	182	76	27.9155	110	70	45.80	154.00	29.70	336.00	88.40	10.50	0.33	13.20	319.00	5.18	13.00	7.79	28.71	22.93	0.80	4.02	4.90	105.56	5.04	1.51	3.17	16.34	0.87
1	1	21	A/A	A/A	175	72	26.4463	120	70	43.20	149.00	30.90	345.00	89.60	11.00	0.27	14.00	245.00	4.82	12.70	7.23	12.55	16.53	1.32	4.15	3.13	87.53	5.28	1.41	1.52	17.69	0.49
1	2	21	A/C	A/G	188	86	31.5886	100	60	45.00	154.00	31.30	342.00	91.50	10.50	0.25	14.00	241.00	4.92	12.50	8.14	13.78	12.86	0.93	5.14	3.12	92.85	5.58	1.35	1.66	12.42	1.10
1	2	20	A/A	A/A	179	105	38.5675	130	80	46.90	167.00	30.10	356.00	84.70	10.60	0.27	13.30	255.00	5.54	11.60	7.20	14.12	18.74	1.33	2.60	3.80	78.46	5.06	0.91	2.48	20.13	1.32
2	1	21	A/C	A/G	167	70	25.7117	110	60	38.80	127.00	29.70	327.00	90.90	11.40	0.30	14.50	261.00	4.27	12.00	7.47	15.03	14.78	0.98	3.45	4.02	59.12	5.33	1.21	2.53	9.64	1.02
1	2	21	A/A	A/A	165	69	25.3444	100	70	51.40	177.00	28.90	344.00	83.80	10.70	0.29	14.10	276.00	6.13	12.20	8.36	74.03	22.45	0.30	5.94	3.78	75.51	5.60	0.98	2.56	13.13	1.53
1	1	21	A/A	A/A	186	72	26.4463	100	70	51.70	177.00	31.40	342.00	91.80	9.90	0.32	12.90	325.00	5.63	13.10	6.30	26.98	21.22	0.79	5.10	4.06	92.59	5.20	1.38	2.46	16.74	0.65
1	2	20	A/C	A/G	172	80	29.3848	100	70	47.90	157.00	30.30	328.00	92.50	10.70	0.29	14.80	273.00	5.18	12.90	8.18	12.48	14.81	1.19	6.69	4.45	96.26	5.08	1.15	2.76	17.03	1.82
1	1	19	A/A	A/A	178	82	30.1194	120	70	51.10	171.00	28.30	335.00	84.50	12.20	0.25	17.20	203.00	6.05	13.10	7.79	43.60	27.97	0.64	4.20	5.49	86.48	5.47	1.45	3.56	11.94	2.30
1	1	20	C/C	G/G	184	89	32.6905	120	80	47.10	151.00	22.40	321.00	69.90	12.30	0.28	15.00	229.00	6.74	16.40	7.03	20.32	16.21	0.80	4.88	3.84	89.79	5.48	1.19	2.19	11.01	1.60
1	2	22	A/A	A/A	170	79	29.0174	100	70	46.80	156.00	29.40	333.00	88.30	12.70	0.23	20.90	180.00	5.30	12.90	7.61	21.23	20.37	0.96	4.77	4.19	83.23	5.03	0.99	2.86	17.69	2.51
2	1	22	C/C	G/G	164	83	30.4867	130	80	44.20	145.00	29.60	328.00	90.20	10.10	0.30	12.70	296.00	4.90	12.40	5.99	17.05	17.66	1.04	5.04	3.52	73.53	5.86	1.25	1.98	11.29	1.02
2	2	21	A/A	A/A	168	70	25.7117	100	70	43.00	142.00	30.90	330.00	93.70	13.30	0.30	18.30	230.00	4.59	12.80	6.50	10.25	13.74	1.34	5.06	3.54	68.57	5.18	1.29	1.98	6.10	0.57
2	2	21	A/C	A/G	171	76	27.9155	110	70	38.10	125.00	27.50	328.00	83.90	13.50	0.19	21.10	142.00	4.54	13.50	5.05	12.90	17.29	1.34	2.65	4.67	81.48	5.38	1.49	2.76	12.71	0.75
2	2	22	A/C	A/G	160	70	25.7117	100	70	41.10	135.00	28.20	328.00	85.80	11.30	0.41	15.50	364.00	4.79	13.60	9.00	24.96	23.70	0.95	5.05	3.69	61.10	5.91	1.19	2.34	10.44	0.76
1	2	21	A/C	A/G	175	75	27.5482	100	60	50.00	175.00	30.10	350.00	85.90	9.80	0.35	12.00	354.00	5.82	12.70	6.98	23.70	18.09	0.76	5.25	4.35	74.99	5.50	1.13	2.87	14.25	0.98
1	1	21	A/A	A/A	175	72	26.4463	110	70	43.90	150.00	30.50	342.00	89.20	11.30	0.28	14.80	247.00	4.92	12.50	5.79	7.33	18.39	2.51	3.87	4.06	96.56	5.66	1.25	2.43	15.02	0.70
2	1	21	A/A	A/A	165	75	27.5482	110	70	40.00	128.00	28.60	320.00	89.50	11.20	0.31	13.20	275.00	4.47	13.00	5.06	13.13	15.87	1.21	4.63	4.16	72.27	5.52	1.08	2.72	13.36	0.81
1	2	20	A/A	A/A	178	76	27.9155	130	70	48.10	161.00	28.80	335.00	85.90	10.20	0.32	12.90	312.00	5.60	13.20	5.77	15.00	13.07	0.87	5.50	4.05	83.94	5.25	0.95	2.56	9.95	2.06
1	2	20	A/A	A/A	181	79	29.0174	100	70	47.60	159.00	27.50	334.00	82.20	11.00	0.27	14.10	246.00	5.79	13.10	7.27	23.02	19.52	0.85	4.12	3.16	78.56	5.31	1.06	1.93	11.07	0.85
1	2	21	A/A	A/A	178	76	27.9155	120	80	47.90	162.00	31.00	338.00	91.80	10.60	0.26	13.00	250.00	5.22	13.10	6.18	16.79	12.80	0.76	5.03	3.35	81.35	5.44	1.27	1.93	17.09	0.46
1	2	22	A/A	A/A	180	78	28.6501	100	60	42.80	141.00	30.00	329.00	91.10	10.80	0.30	13.70	280.00	4.70	12.50	8.26	25.73	23.91	0.93	5.56	4.26	87.65	5.66	1.64	2.23	33.78	0.80
1	1	20	A/C	A/G	171	77	28.2828	130	80	47.30	160.00	28.70	338.00	84.80	9.50	0.30	11.30	321.00	5.58	12.60	5.98	17.73	21.98	1.24	4.19	5.08	87.74	5.36	1.00	3.37	10.88	2.23
1	2	19	A/A	A/A	182	70	25.7117	120	80	46.90	155.00	31.40	330.00	95.10	10.00	0.33	12.70	328.00	4.93	12.00	9.21	12.60	13.73	1.09	4.93	3.38	76.00	5.68	1.15	2.01	10.28	0.61
1	1	21	A/A	A/A	181	90	33.0579	120	80	47.10	159.00	30.80	338.00	91.10	10.00	0.26	11.80	261.00	5.17	12.30	6.54	19.40	18.73	0.97	2.70	3.83	78.71	4.54	1.20	2.35	12.64	0.69
1	2	22	C/C	G/G	170	72	26.4463	120	80	45.10	151.00	30.70	335.00	91.70	9.50	0.33	11.40	346.00	4.92	12.20	6.15	14.24	13.02	0.91	5.33	3.60	83.97	5.38	1.11	2.26	7.28	0.94
1	1	20	A/A	A/A	170	74	27.1809	120	70	46.90	160.00	29.90	341.00	87.70	8.50	0.25	10.10	289.00	5.35	11.80	10.14	21.19	30.70	1.45	4.73	3.55	107.51	5.45	1.20	2.15	16.15	0.67
1	1	22	A/A	A/A	180	82	30.1194	120	70	45.50	152.00	30.60	334.00	91.50	10.60	0.33	13.20	312.00	4.97	11.70	6.21	26.46	22.09	0.83	3.10	3.11	73.75	5.35	1.31	1.69	12.15	0.91
1	2	20	A/A	A/A	190	83	30.4867	120	80	48.00	159.00	29.00	331.00	87.40	11.70	0.24	16.20	203.00	5.49	13.30	6.36	7.59	16.48	2.17	3.67	3.72	73.06	4.62	1.18	2.20	19.52	0.67
1	1	22	A/C	A/G	179	72	26.4463	120	80	47.50	164.00	30.80	345.00	89.30	9.80	0.28	11.90	287.00	5.32	11.60	6.52	14.01	16.20	1.16	4.63	4.80	73.94	4.89	1.45	2.82	16.38	0.99
1	2	21	A/C	A/G	180	75	27.5482	130	80	50.20	168.00	28.70	335.00	85.70	10.90	0.33	14.90	299.00	5.86	13.00	6.67	13.93	19.08	1.37	4.42	5.14	88.89	4.82	1.31	3.31	43.13	1.68
1	1	22	A/A	A/A	183	85	31.2213	120	70	38.80	133.00	30.90	343.00	90.00	10.10	0.19	11.80	188.00	4.31	11.60	4.18	70.44	33.61	0.48	3.24	3.84	79.27	4.93	0.92	2.53	14.58	1.48
1	1	22	A/C	A/G	178	70	25.7117	120	80	47.30	164.00	30.10	347.00	86.90	10.70	0.32	14.70	295.00	5.44	12.30	5.34	29.76	24.14	0.81	4.79	3.83	97.14	4.96	1.19	2.11	15.40	2.10
1	1	19	A/C	A/G	178	79	29.0174	120	70	46.10	159.00	31.20	345.00	90.40	10.80	0.30	13.70	280.00	5.10	12.90	6.33	11.35	12.79	1.13	3.39	4.45	74.95	5.68	1.08	2.96	22.54	0.98
1	2	22	A/C	A/G	177	80.5	29.5684	112	80	47.00	156.00	29.20	332.00	88.00	9.70	0.27	12.60	282.00	5.34	12.60	6.29	17.85	18.12	1.02	4.16	3.33	80.76	4.82	1.20	1.90	12.71	0.80
1	1	22	A/C	A/G	170	70	25.7117	120	70	48.20	163.00	30.60	338.00	90.60	10.70	0.29	13.40	273.00	5.32	12.30	7.02	18.34	19.18	1.05	4.24	3.89	80.70	4.78	1.13	2.26	15.69	1.64
1	1	20	A/C	A/G	174	71	26.079	120	70	47.70	158.00	28.70	331.00	86.60	11.60	0.22	16.00	193.00	5.51	13.30	5.22	27.87	32.15	1.15	5.26	4.70	94.67	5.26	1.46	2.97	15.06	0.60
1	1	19	A/C	A/G	179	72	26.4463	120	70	45.20	154.00	29.50	341.00	86.60	11.00	0.33	14.20	302.00	5.22	13.00	6.50	14.89	13.89	0.93	5.23	3.33	82.50	5.26	1.39	1.74	17.28	0.76
1	1	19	A/C	A/G	185	73	26.8136	120	70	47.10	156.00	28.90	331.00	87.20	12.30	0.28	17.80	226.00	5.40	12.70	7.35	32.46	26.24	0.81	5.46	3.64	89.03	5.12	1.07	2.24	9.17	0.72
1	1	20	A/A	A/A	178	93	34.1598	120	70	47.40	165.00	30.20	348.00	86.70	11.50	0.35	15.30	303.00	5.47	11.90	6.13	46.37	29.36	0.63	3.12	3.30	68.58	4.93	1.00	1.98	11.18	1.12
1	2	22	A/A	A/A	175	71	26.079	120	70	49.60	169.00	31.50	341.00	92.40	10.80	0.35	13.70	324.00	5.37	12.70	6.98	17.93	15.53	0.87	4.64	4.99	80.00	5.15	1.59	2.97	9.62	1.95
1	2	23	A/C	A/G	176	70	25.7117	120	70	44.00	145.00	29.20	330.00	88.70	9.80	0.39	11.60	398.00	4.96	12.70	7.08	11.80	15.92	1.35	4.11	4.07	84.20	5.23	1.34	2.33	15.54	0.97
1	1	22	A/A	A/A	170	75	27.5482	110	70	51.70	178.00	30.20	344.00	87.80	11.10	0.26	14.30	239.00	5.89	12.90	7.14	43.01	23.01	0.53	4.34	5.19	73.34	4.44	1.18	3.63	19.97	0.86
1	2	22	A/C	A/G	176	74	27.1809	120	80	47.10	151.00	30.60	321.00	95.50	11.40	0.31	15.40	275.00	4.93	13.30	7.43	10.94	14.61	1.34	5.40	3.66	73.38	4.88	1.37	1.94	16.96	0.86
1	1	21	A/A	A/A	181	98	35.9963	110	60	45.00	148.00	29.70	329.00	90.40	9.80	0.24	11.40	248.00	4.98	12.80	7.06	29.18	26.19	0.90	5.71	3.91	86.38	5.41	1.11	2.53	5.58	1.05
1	2	22	C/C	G/G	170	70	25.7117	120	70	47.20	160.00	29.50	339.00	87.10	10.40	0.33	13.50	314.00	5.42	12.80	8.56	41.28	28.00	0.68	5.41	3.93	68.36	5.38	1.40	2.16	16.85	1.43
1	2	22	A/C	A/G	170	72	26.4463	120	80	50.90	177.00	31.00	348.00	89.10	11.00	0.26	14.60	234.00	5.71	12.80	8.43	36.99	23.08	0.62	4.22	4.97	75.09	5.01	1.33	2.93	16.88	2.01
1	1	21	C/C	G/G	178	73	26.8136	120	70	45.70	162.00	31.10	354.00	87.70	10.50	0.25	13.00	234.00	5.21	12.30	8.37	17.63	16.42	0.93	3.86	3.64	80.19	5.17	1.10	2.21	14.40	1.56
1	1	21	C/C	G/G	188	95	34.8944	140	100	49.40	163.00	28.20	330.00	85.30	11.90	0.35	16.20	291.00	5.79	13.30	8.32	56.57	28.04	0.50	6.80	4.98	92.65	6.04	0.89	3.59	11.39	1.89
1	1	18	A/C	A/G	180	78	28.6501	120	70	44.00	148.00	28.10	336.00	83.50	9.50	0.23	11.60	243.00	5.27	12.30	6.29	12.31	15.33	1.25	4.70	4.24	77.25	5.28	0.97	2.82	14.77	1.84
1	1	22	A/C	A/G	172	78	28.6501	130	80	45.30	153.00	29.20	338.00	86.50	10.40	0.32	12.90	312.00	5.24	12.90	7.41	10.97	15.41	1.40	3.20	3.29	73.49	5.16	0.96	2.03	14.81	0.76
1	1	22	A/C	A/G	184	103	37.8329	120	90	44.00	150.00	28.80	341.00	84.50	10.80	0.28	14.00	256.00	5.21	12.60	7.27	37.23	26.39	0.71	5.93	4.26	74.17	4.89	0.90	2.00	8.61	6.00
1	2	23	A/A	A/A	175	75	27.5482	120	70	44.60	150.00	29.40	336.00	87.50	11.00	0.20	15.50	186.00	5.10	13.90	4.13	38.05	27.96	0.73	4.79	4.26	91.45	4.45	1.43	2.47	19.37	0.56
1	2	23	A/C	A/G	176	77	28.2828	120	80	46.10	154.00	30.30	334.00	90.70	10.40	0.31	13.10	298.00	5.08	12.40	6.68	25.68	20.71	0.81	4.83	3.88	74.19	4.64	1.33	2.18	9.21	0.97
1	2	22	A/A	A/A	184	87	31.9559	120	80	49.50	169.00	31.90	341.00	93.40	10.50	0.33	12.80	314.00	5.30	12.40	7.10	27.98	17.74	0.63	5.48	3.15	71.51	4.78	0.94	2.01	35.07	1.48
1	2	21	A/A	A/A	171	91	33.4252	120	80	46.40	159.00	29.00	343.00	84.50	10.40	0.32	12.60	303.00	5.49	13.40	8.29	39.19	23.16	0.59	5.78	4.36	90.45	4.81	1.08	2.84	12.14	1.08
2	1	19	A/A	A/A	164	69	25.3444	104	70	42.70	142.00	28.90	333.00	86.80	10.70	0.43	13.80	403.00	4.92	12.70	9.65	20.80	16.17	0.78	3.49	3.72	59.06	5.21	1.48	2.07	8.13	1.59
1	1	21	A/A	A/A	185	94	34.5271	130	80	46.00	153.00	28.20	333.00	84.90	11.00	0.26	14.50	235.00	5.42	12.70	5.76	21.96	15.80	0.72	3.96	5.12	84.48	5.12	1.40	3.15	14.33	1.10
2	1	20	C/C	G/G	157	70	25.7117	120	80	41.70	136.00	29.50	326.00	90.50	11.00	0.39	13.30	353.00	4.61	13.60	7.20	15.74	14.97	0.95	4.26	5.06	61.68	4.85	1.41	3.28	14.29	1.93
2	1	20	A/C	A/G	170	69	25.3444	110	70	43.30	144.00	29.10	333.00	87.70	12.40	0.25	18.20	197.00	4.94	12.70	6.40	12.71	14.18	1.12	3.47	3.96	62.22	5.20	0.98	2.59	6.75	1.10
1	1	20	C/C	G/G	176	70	25.7117	90	60	47.20	162.00	30.70	343.00	89.60	11.30	0.27	15.00	236.00	5.27	12.30	4.52	22.85	23.77	1.04	6.68	3.07	73.62	4.99	0.76	1.97	20.80	0.82
1	1	21	C/C	G/G	170	85	31.2213	100	60	48.80	167.00	31.60	342.00	92.20	10.50	0.37	13.30	349.00	5.29	12.30	8.61	45.36	24.08	0.53	4.83	3.69	84.47	5.40	0.95	2.18	16.19	1.88
2	1	20	A/A	A/A	174	80	29.3848	100	60	39.90	127.00	27.60	318.00	86.70	11.00	0.34	12.90	313.00	4.60	13.10	6.11	23.36	25.23	1.08	5.06	3.24	64.93	4.97	1.37	1.56	10.76	0.47
1	3	21	A/A	A/A	178	85	31.2213	100	60	51.00	170.00	29.90	333.00	89.60	11.10	0.27	14.50	246.00	5.69	12.90	9.15	48.11	33.56	0.70	6.37	3.94	86.16	4.69	0.90	2.51	11.68	1.35
1	1	21	C/C	G/G	170	78	28.6501	100	60	45.80	148.00	29.70	323.00	92.00	11.70	0.28	15.40	238.00	4.98	12.10	7.16	19.89	16.71	0.84	5.11	4.12	73.94	5.25	1.44	2.12	11.14	1.38
1	1	21	C/C	G/G	178	70	25.7117	110	70	49.30	174.00	31.10	353.00	88.20	10.20	0.28	13.00	276.00	5.59	13.00	4.68	33.10	22.85	0.69	4.47	3.30	79.07	5.29	1.32	1.61	29.67	0.92
1	1	20	A/A	A/A	178	74	27.1809	100	70	43.10	145.00	30.50	336.00	90.70	11.50	0.22	15.20	194.00	4.75	12.00	3.70	11.57	13.15	1.14	3.26	8.68	72.37	4.81	1.20	6.49	13.11	0.80
1	3	22	A/A	A/A	176	71	26.079	110	60	50.80	170.00	29.70	335.00	88.80	10.70	0.28	13.80	267.00	5.72	12.60	7.39	26.39	20.61	0.78	6.04	4.13	91.21	5.15	1.12	2.39	10.82	1.12
1	1	21	A/A	A/A	169	82	30.1194	130	80	51.10	174.00	29.70	341.00	87.40	10.60	0.33	13.40	307.00	5.85	14.00	6.52	46.30	28.53	0.62	5.38	4.34	89.07	4.56	0.94	2.78	21.41	1.68
1	3	20	A/A	A/A	170	80	29.3848	100	60	48.00	167.00	29.40	348.00	84.50	11.10	0.31	13.90	277.00	5.68	13.20	10.03	8.38	12.01	1.43	7.26	4.13	76.15	4.90	1.25	2.47	7.77	0.78
1	1	20	C/C	G/G	177	76	27.9155	130	80	47.30	163.00	30.90	345.00	89.80	11.80	0.29	15.90	249.00	5.27	12.00	6.13	23.38	17.70	0.76	4.33	3.93	77.93	5.28	1.04	2.31	9.66	1.08
2	1	21	A/C	A/G	156	71	26.079	120	60	43.70	145.00	29.70	332.00	89.40	10.80	0.35	14.80	323.00	4.89	12.10	6.75	21.37	18.11	0.85	3.46	4.44	56.02	4.84	0.95	2.92	9.96	1.00
2	2	21	A/C	A/G	165	69	25.3444	110	70	41.00	138.00	28.00	337.00	83.20	9.90	0.39	12.40	390.00	4.93	13.40	8.91	9.74	17.49	1.80	2.71	4.46	61.99	4.60	1.24	2.83	13.48	1.03
1	2	21	A/A	A/A	174	78	28.6501	120	70	49.80	169.00	30.00	339.00	88.30	10.90	0.35	14.30	321.00	5.64	12.80	7.05	18.75	29.47	1.57	7.32	4.36	81.12	5.01	1.30	2.63	13.36	0.59
2	2	19	A/C	A/G	167	78	28.6501	120	60	39.00	125.00	27.50	321.00	85.90	10.80	0.32	14.40	302.00	4.54	13.90	9.00	12.40	12.00	0.97	2.28	2.95	45.56	4.58	0.98	1.75	9.48	0.81
1	2	19	A/A	A/A	186	87	31.9559	124	70	44.70	150.00	28.80	336.00	86.00	12.00	0.20	17.30	167.00	5.20	12.40	8.94	12.36	18.28	1.48	6.47	3.27	104.21	5.24	1.28	1.61	11.63	1.39
1	1	19	A/A	A/A	180	70	25.7117	120	70	50.00	171.00	30.80	342.00	90.10	9.60	0.30	11.70	312.00	5.55	13.20	8.77	20.56	24.10	1.17	4.00	4.13	84.71	4.95	1.52	2.20	17.64	1.90
1	1	20	A/A	A/A	179	79	29.0174	130	80	50.20	171.00	30.50	341.00	89.50	10.80	0.18	14.00	166.00	5.61	13.60	3.58	14.84	15.85	1.07	4.29	3.47	101.79	5.21	1.43	1.67	13.68	0.96
1	2	20	C/C	G/G	180	74	27.1809	130	80	45.40	150.00	28.10	330.00	85.20	10.60	0.22	13.30	209.00	5.33	13.70	9.52	12.10	22.13	1.83	6.96	4.23	121.73	4.94	1.07	2.60	15.28	1.73
1	1	19	C/C	G/G	194	102	37.4656	120	80	45.00	150.00	30.00	333.00	90.00	10.10	0.30	12.80	294.00	5.00	12.60	6.12	49.35	19.94	0.40	3.45	4.20	91.17	5.23	1.01	2.83	20.72	1.38
1	1	21	A/A	A/A	172	71	26.079	120	70	44.70	155.00	30.80	347.00	88.90	11.50	0.27	15.70	238.00	5.03	12.40	7.45	78.45	37.57	0.48	5.74	3.71	78.76	4.74	0.81	2.02	8.89	4.80
1	1	21	A/A	A/A	180.5	92	33.7925	120	80	45.30	146.00	28.10	322.00	87.30	11.60	0.31	16.20	268.00	5.19	14.00	10.70	21.71	15.79	0.73	4.83	3.81	82.09	4.03	0.66	2.35	10.33	3.26
1	2	20	C/C	G/G	174	70	25.7117	120	70	50.50	167.00	31.00	331.00	93.90	11.50	0.22	15.70	192.00	5.38	13.00	6.70	18.24	16.10	0.88	3.99	3.99	95.09	5.38	0.96	2.54	18.34	1.15
1	1	19	A/A	A/A	186	79	29.0174	120	70	48.70	161.00	29.90	331.00	90.40	11.20	0.20	13.70	179.00	5.39	12.80	5.86	22.17	17.35	0.78	3.13	3.74	84.07	5.41	1.43	2.02	20.19	0.78
1	1	22	A/A	A/A	178	75	27.5482	110	70	46.50	160.00	31.40	344.00	91.20	11.70	0.19	16.20	166.00	5.10	13.20	4.64	35.99	25.70	0.71	3.00	4.33	88.97	4.71	1.35	2.58	21.00	0.86
1	1	19	A/A	A/A	180	100	36.7309	130	80	44.10	147.00	30.40	333.00	91.30	12.70	0.30	19.10	235.00	4.83	12.40	6.14	18.93	19.35	1.02	2.83	5.53	85.30	5.24	1.43	3.46	11.69	0.83
1	4	20	A/A	A/A	173	70	25.7117	120	80	45.40	151.00	29.80	333.00	89.50	10.50	0.27	12.90	259.00	5.07	14.70	5.97	13.17	18.72	1.42	4.28	4.50	88.10	5.21	1.40	2.66	11.74	0.89
2	2	19	A/C	A/G	168	80	29.3848	120	80	39.40	126.00	26.50	320.00	82.90	10.20	0.43	12.90	421.00	4.75	14.20	7.97	14.26	20.78	1.46	4.08	4.34	72.00	4.98	1.06	2.75	7.93	1.74
1	1	22	A/A	A/A	176	78	28.6501	120	80	47.30	163.00	29.40	345.00	85.40	9.90	0.32	12.80	320.00	5.54	13.90	9.75	26.02	22.80	0.88	4.74	3.93	81.60	5.12	1.05	2.53	17.72	1.16
2	1	18	A/A	A/A	171	77	28.2828	114	70	41.30	131.00	27.10	317.00	85.50	11.00	0.32	13.70	289.00	4.83	13.10	7.95	11.83	12.86	1.09	3.39	4.73	53.33	4.55	1.44	2.87	8.01	0.61
1	1	17	A/A	A/A	171	85	31.2213	120	80	48.80	172.00	30.50	352.00	86.50	12.20	0.34	17.10	278.00	5.64	13.10	8.17	26.87	21.96	0.82	3.78	3.61	91.68	5.09	1.05	2.27	25.65	1.06
1	1	21	A/A	A/A	179	78	28.6501	130	80	49.30	162.00	31.00	329.00	94.30	11.70	0.29	15.80	248.00	5.23	12.00	6.41	21.52	18.49	0.86	4.45	4.06	83.17	4.95	0.99	2.64	19.13	1.48
1	1	19	C/C	G/G	172	84	30.854	120	80	46.20	159.00	30.80	344.00	89.40	10.90	0.21	13.40	141.00	5.17	13.20	6.86	25.85	22.01	0.85	4.65	4.17	91.76	4.97	1.15	2.40	18.08	1.92
2	1	20	A/A	A/A	166	86	31.5886	130	80	43.20	141.00	29.30	326.00	89.80	10.60	0.35	13.40	332.00	4.81	13.00	10.00	33.95	18.96	0.56	3.51	4.67	64.63	4.95	0.87	2.99	7.65	2.78
1	1	22	C/C	G/G	180	109	40.0367	140	100	49.60	160.00	28.50	323.00	88.40	10.40	0.27	13.50	262.00	5.61	14.00	8.19	34.04	24.58	0.72	5.85	3.66	87.28	5.11	0.98	2.29	20.79	1.33
1	1	20	A/A	A/A	170	78	28.6501	120	80	46.80	152.00	28.60	325.00	88.00	11.30	0.31	14.50	275.00	5.32	12.50	5.93	15.78	15.33	0.97	4.87	4.71	91.10	5.06	1.16	3.12	8.22	0.95
1	1	20	A/A	A/A	174	70	25.7117	110	70	49.80	165.00	30.40	331.00	91.70	11.00	0.32	14.00	287.00	5.43	12.60	6.12	36.46	28.11	0.77	4.77	3.60	73.05	4.37	1.25	1.93	18.04	1.15
1	1	20	C/C	G/G	179	78	28.6501	120	70	48.00	162.00	28.90	338.00	85.70	10.10	0.37	12.30	365.00	5.60	12.80	7.37	22.76	14.72	0.65	5.60	5.64	80.03	5.83	1.18	3.91	11.10	1.16
1	2	19	A/A	A/A	182	75	27.5482	110	70	47.10	151.00	27.10	321.00	84.40	11.10	0.33	14.80	293.00	5.58	15.30	6.36	13.58	13.78	1.01	3.20	5.52	71.71	5.21	1.63	3.25	13.02	0.97
2	2	19	A/C	A/G	170	70	25.7117	120	80	40.40	129.00	27.80	319.00	87.10	10.80	0.35	13.30	323.00	4.64	14.20	7.20	16.68	17.61	1.06	3.87	4.08	54.04	4.84	1.23	2.51	15.21	0.59
2	2	20	A/A	A/A	172	70	25.7117	110	70	42.10	138.00	29.70	328.00	90.70	10.30	0.18	13.00	176.00	4.64	13.10	6.51	17.44	22.35	1.28	2.94	5.22	63.86	4.59	1.52	3.22	9.73	0.81
2	2	20	A/C	A/G	164	72	26.4463	120	70	41.80	136.00	30.00	325.00	92.10	11.80	0.29	16.70	247.00	4.54	12.50	9.43	34.30	15.70	0.46	3.58	3.74	52.45	4.97	1.39	2.00	20.45	0.52
1	2	19	A/A	A/A	192.5	83	30.4867	110	70	47.80	159.00	29.70	333.00	89.30	11.00	0.30	14.10	271.00	5.35	13.70	6.57	15.52	15.19	0.98	5.58	4.22	79.52	5.05	1.34	2.50	28.90	0.85
2	2	23	A/C	A/G	170	72	26.4463	120	80	38.50	122.00	28.80	317.00	90.80	10.90	0.33	13.70	306.00	4.24	12.60	7.81	15.18	17.57	1.16	4.03	4.77	70.31	5.35	1.28	2.98	15.57	1.09
2	1	20	A/C	A/G	172	86	31.5886	130	90	45.30	147.00	30.30	325.00	93.40	12.20	0.17	16.30	142.00	4.85	12.50	5.88	17.03	20.02	1.18	3.65	3.81	58.48	5.05	1.14	2.37	25.46	0.69
1	1	20	A/A	A/A	178	85	31.2213	120	80	49.20	157.00	27.60	319.00	86.50	10.30	0.35	12.60	345.00	5.69	14.10	5.04	18.19	19.46	1.07	2.91	3.46	74.32	4.61	1.28	1.95	16.99	0.92
1	1	20	A/A	A/A	185	70	25.7117	120	70	51.50	172.00	31.30	334.00	93.60	10.90	0.37	14.60	335.00	5.50	12.90	7.07	22.74	18.60	0.82	5.35	3.73	82.02	4.92	0.99	2.43	10.37	1.05
1	2	22	A/A	A/A	176	74	27.1809	114	70	44.00	149.00	30.50	339.00	90.20	10.80	0.30	13.80	279.00	4.88	13.20	6.46	74.58	54.23	0.73	4.71	5.37	80.37	4.05	1.18	3.48	11.06	1.81
1	1	22	A/A	A/A	171.5	77	28.2828	114	70	46.00	151.00	31.90	328.00	97.30	12.80	0.33	17.60	260.00	4.73	13.10	5.29	55.67	35.84	0.64	4.58	4.62	79.72	4.92	1.41	2.74	13.38	0.91
1	1	24	A/A	A/A	181	78	28.6501	118	70	47.50	154.00	28.60	324.00	88.30	11.70	0.36	15.40	305.00	5.38	13.40	6.99	31.68	20.62	0.65	4.09	5.00	67.63	4.95	0.95	3.30	5.47	1.88
2	2	20	A/A	A/A	168	70	25.7117	102	70	39.20	124.00	28.50	316.00	90.10	11.00	0.45	14.00	409.00	4.35	12.50	9.58	15.09	12.40	0.82	3.01	3.36	70.79	4.52	1.36	1.59	8.42	1.07
2	1	20	A/A	A/A	176	69	25.3444	100	60	41.90	144.00	30.60	344.00	89.10	11.00	0.20	13.90	180.00	4.70	11.90	4.95	12.86	13.79	1.07	3.51	2.99	62.46	4.33	1.12	1.57	25.98	0.62
2	2	20	A/A	A/A	167	81	29.7521	114	70	39.40	130.00	29.40	330.00	89.10	10.70	0.29	12.70	273.00	4.42	12.80	7.54	10.22	13.12	1.28	4.32	3.57	71.20	4.78	1.08	2.13	14.01	0.74
1	2	20	A/A	A/A	175	69	25.3444	108	70	45.80	146.00	25.50	319.00	79.90	11.40	0.36	14.70	317.00	5.73	15.70	7.57	26.72	55.20	2.07	5.34	4.16	80.36	4.40	1.44	2.34	10.96	0.69
1	2	20	A/A	A/A	179	80	29.3848	120	70	46.80	153.00	29.10	327.00	89.00	12.40	0.21	18.80	165.00	5.26	12.50	5.55	18.33	15.67	0.85	2.57	4.11	75.70	4.68	1.71	1.99	11.23	0.74
2	1	20	A/C	A/G	163	77	28.2828	114	70	43.50	145.00	28.80	333.00	86.50	10.70	0.30	13.00	281.00	5.03	12.70	9.92	14.39	11.38	0.79	4.28	4.20	58.23	4.45	0.83	2.91	11.54	1.14
1	3	21	A/A	A/A	178.5	82	30.1194	120	80	47.50	157.00	28.10	331.00	85.00	11.40	0.28	14.90	249.00	5.59	13.90	8.23	16.46	21.19	1.29	4.36	4.09	85.42	4.14	1.16	2.51	13.63	0.79
1	2	24	A/A	A/A	172.5	69	25.3444	114	70	42.80	145.00	29.50	339.00	87.00	11.80	0.23	15.40	196.00	4.92	13.00	4.88	34.93	20.89	0.60	4.30	3.77	65.81	4.43	1.15	2.25	24.44	0.67
2	2	19	A/C	A/G	167	73	26.8136	110	70	36.50	118.00	28.20	323.00	87.30	10.00	0.36	12.20	364.00	4.18	12.60	5.35	13.00	18.63	1.43	3.05	3.35	64.50	4.47	1.10	2.00	8.30	0.54
1	1	20	A/A	A/A	175	85	31.2213	120	80	50.70	170.00	30.40	335.00	90.70	11.90	0.22	15.80	183.00	5.59	12.70	7.42	20.14	25.08	1.25	3.38	3.07	85.69	4.45	1.45	1.30	15.76	0.86
2	2	18	A/C	A/G	170	76	27.9155	120	80	39.60	129.00	31.40	326.00	96.40	12.20	0.24	17.10	197.00	4.11	12.20	4.87	24.04	21.87	0.91	5.38	4.57	77.64	4.14	1.49	2.63	21.86	0.73
2	1	20	A/C	A/G	176	90	33.0579	120	80	42.40	143.00	31.60	337.00	93.80	8.90	0.23	10.20	254.00	4.52	12.00	6.80	14.81	18.63	1.26	5.51	4.23	72.13	5.26	1.59	2.34	17.85	0.56
1	1	19	A/A	A/A	180	96	35.2617	130	80	45.10	151.00	30.90	335.00	92.40	9.90	0.25	11.70	252.00	4.88	12.70	5.80	16.58	15.26	0.92	3.18	4.25	88.09	5.52	1.06	2.78	14.91	1.18
2	1	19	A/C	A/G	163	73	26.8136	110	70	42.20	135.00	28.40	320.00	88.70	11.30	0.35	14.90	312.00	4.76	13.60	7.75	24.56	18.00	0.73	4.11	4.72	69.64	5.22	1.38	2.91	10.54	1.17
1	2	21	A/C	G/G	180	85	31.2213	120	80	47.20	162.00	31.30	343.00	91.30	11.50	0.32	16.50	280.00	5.17	13.00	8.62	57.99	51.15	0.88	6.20	4.45	105.65	5.04	1.33	2.88	17.58	1.18
1	2	21	A/A	A/A	180	70	25.7117	120	80	50.20	172.00	29.10	343.00	84.90	10.90	0.30	14.10	274.00	5.91	12.70	6.53	16.07	14.74	0.92	4.67	4.52	84.71	5.25	1.29	3.02	12.35	0.84
2	1	21	A/A	A/A	170	77	28.2828	130	80	41.70	139.00	30.20	333.00	90.50	11.80	0.27	15.30	232.00	4.61	12.40	7.34	22.70	26.67	1.17	3.08	3.58	59.67	5.59	1.25	2.09	16.44	0.63
1	3	21	A/A	A/A	178	92	33.7925	110	70	44.50	149.00	28.40	335.00	84.80	10.70	0.27	13.40	255.00	5.25	12.60	5.85	25.55	19.27	0.75	3.49	3.93	76.35	4.94	1.31	2.20	7.22	0.78
1	1	20	C/C	G/G	176	105	38.5675	140	100	46.10	148.00	24.90	321.00	77.60	10.80	0.29	14.10	269.00	5.94	14.80	5.88	44.83	60.91	1.36	4.68	3.75	71.16	5.12	0.80	2.48	13.95	1.30
1	1	24	A/A	A/A	181	81	29.7521	130	80	42.30	140.00	31.00	331.00	93.60	10.50	0.28	13.50	270.00	4.52	11.50	6.18	20.53	24.78	1.21	7.27	3.04	85.96	5.06	1.25	1.48	7.35	0.82
1	1	20	C/C	A/G	186	69	25.3444	120	80	50.90	171.00	30.00	336.00	89.30	10.50	0.31	13.30	293.00	5.70	12.00	6.96	19.32	18.96	0.98	3.53	3.24	76.52	4.73	1.33	1.58	14.72	1.10
1	3	21	A/A	A/A	172	72	26.4463	110	70	47.10	155.00	28.30	329.00	85.90	9.30	0.36	11.00	388.00	5.48	13.80	8.07	17.70	18.02	1.02	4.83	3.59	85.83	4.97	1.29	1.95	8.71	0.72
2	1	21	A/C	A/G	160	69	25.3444	120	80	41.20	133.00	26.10	323.00	80.80	10.10	0.41	12.40	404.00	5.10	13.30	8.18	23.58	18.48	0.78	4.68	4.64	45.30	11.71	0.97	3.08	8.47	3.47
2	2	20	A/C	A/G	163	70	25.7117	130	80	44.30	143.00	29.70	323.00	91.90	10.00	0.32	12.30	324.00	4.82	13.00	5.75	20.54	18.89	0.92	2.53	3.28	62.03	4.85	1.39	1.66	7.77	0.71
1	2	23	A/A	A/A	176	77	28.2828	120	80	47.30	161.00	30.10	340.00	88.40	10.60	0.29	13.60	276.00	5.35	13.40	5.24	30.94	16.79	0.54	3.06	3.61	64.12	5.03	1.01	2.29	10.46	0.76
1	2	26	A/A	A/A	190	82	30.1194	130	80	45.20	150.00	29.30	332.00	88.30	9.80	0.36	12.30	368.00	5.12	13.80	6.50	21.71	21.22	0.98	4.98	4.76	74.18	5.24	1.19	3.13	14.89	1.07
2	2	23	A/A	A/A	172	69	25.3444	120	80	37.90	120.00	28.40	317.00	89.80	11.10	0.44	14.30	392.00	4.22	12.70	7.98	11.32	17.47	1.54	4.33	3.64	58.23	5.26	1.20	2.06	9.65	0.82
1	2	24	A/A	A/A	169	90	33.0579	120	80	44.60	151.00	30.70	339.00	90.70	11.50	0.33	15.80	289.00	4.92	13.00	6.88	57.95	26.74	0.46	5.50	3.79	87.92	5.24	0.93	2.41	15.77	2.35
1	1	20	A/A	A/A	182	75	27.5482	120	70	49.60	164.00	28.80	331.00	87.20	11.20	0.32	14.70	285.00	5.69	13.40	8.24	31.54	19.91	0.63	5.35	3.67	77.77	5.29	1.15	2.19	11.34	1.25
1	2	24	A/A	A/A	180	70	25.7117	120	80	44.10	148.00	29.60	336.00	88.20	11.50	0.28	15.20	239.00	5.00	12.10	7.06	17.22	20.52	1.19	6.05	4.57	62.79	4.84	1.02	3.13	19.22	0.58
1	2	23	A/C	G/G	168	74	27.1809	130	80	49.50	164.00	28.40	331.00	85.60	10.50	0.26	14.10	252.00	5.78	14.10	8.29	41.22	26.71	0.65	5.70	10.13	87.42	4.71	0.86	5.32	11.99	8.40
1	1	20	A/A	A/A	182	85	31.2213	120	70	50.70	169.00	29.40	333.00	88.30	11.20	0.28	14.10	252.00	5.74	13.30	7.80	15.16	17.37	1.15	3.20	3.27	84.96	4.97	1.39	1.59	17.22	0.94
1	2	25	A/A	A/A	170	73	26.8136	120	80	45.80	151.00	31.80	330.00	96.40	9.30	0.29	11.30	309.00	4.75	12.90	6.65	30.84	26.01	0.84	4.22	4.81	89.42	5.80	1.37	3.04	7.30	0.85
2	1	21	A/A	A/A	167	69	25.3444	100	60	42.90	145.00	29.50	338.00	87.40	11.40	0.34	15.40	303.00	4.91	12.60	3.74	11.09	15.57	1.40	1.99	4.32	54.80	5.05	1.44	2.56	28.91	0.86
1	1	22	A/A	A/A	179	70	25.7117	120	70	49.60	161.00	28.00	325.00	86.40	12.90	0.20	20.90	155.00	5.74	12.90	7.16	24.63	24.25	0.98	3.72	4.29	94.56	5.29	1.27	2.62	9.31	0.60
2	1	20	A/A	A/A	170	80	29.3848	130	80	43.00	142.00	29.60	330.00	89.80	10.50	0.28	12.80	263.00	4.79	12.80	6.03	26.48	21.80	0.82	3.71	3.64	69.57	5.81	1.22	2.13	14.50	1.10
2	1	20	A/C	A/G	160	77	28.2828	110	70	43.00	145.00	30.10	337.00	89.40	11.50	0.36	15.60	310.00	4.81	12.30	10.58	14.64	18.95	1.29	3.85	3.67	63.48	5.69	1.20	2.16	14.65	1.00
2	2	24	A/C	A/G	160	70	25.7117	110	60	33.30	101.00	24.30	303.00	80.20	10.50	0.36	12.80	347.00	4.15	14.80	6.20	12.06	15.01	1.24	4.52	4.16	72.27	4.81	1.27	2.48	4.98	0.77
2	1	22	A/C	A/G	162	72	26.4463	105	60	39.00	126.00	30.10	323.00	93.30	10.00	0.27	12.30	265.00	4.18	12.50	5.39	12.68	19.98	1.58	4.49	4.55	66.78	5.56	1.50	2.78	11.24	0.57
1	1	22	C/C	G/G	179	85	31.2213	138	92	47.20	159.00	29.30	337.00	86.90	10.20	0.33	13.00	321.00	5.43	12.80	6.43	27.82	19.10	0.69	4.71	3.37	59.82	5.19	1.05	1.86	13.65	2.26
2	2	25	C/C	A/G	160	75	27.5482	104	70	41.10	132.00	30.30	321.00	94.50	9.50	0.32	11.00	332.00	4.35	13.60	11.83	11.89	14.06	1.18	4.20	5.00	60.64	4.88	1.25	3.32	6.79	1.16
2	2	23	C/C	G/G	168	70	25.7117	110	60	40.60	134.00	28.60	330.00	86.60	10.80	0.28	14.20	261.00	4.69	13.00	5.07	9.09	15.12	1.66	1.54	3.73	54.82	4.78	1.66	1.77	24.89	0.63
1	2	23	C/C	G/G	170	82	30.1194	125	90	44.90	156.00	30.10	347.00	86.70	11.90	0.32	16.70	272.00	5.18	12.60	8.05	58.67	22.38	0.38	6.10	4.80	80.50	5.18	1.13	3.18	8.22	1.10
2	2	20	A/C	A/G	178	70	25.7117	104	60	38.60	130.00	27.80	337.00	82.50	12.20	0.28	16.80	232.00	4.68	14.00	6.26	28.62	20.82	0.73	4.13	4.14	70.15	5.08	1.37	2.36	7.32	0.56
2	2	21	A/A	A/A	162	85	31.2213	130	90	41.60	132.00	27.20	317.00	85.80	12.20	0.46	16.40	375.00	4.85	13.10	8.03	25.86	25.19	0.97	2.77	4.49	58.60	3.83	1.39	2.54	12.93	1.26
2	1	21	A/A	A/A	161	69	25.3444	118	70	44.00	143.00	28.50	325.00	87.80	9.50	0.37	11.10	387.00	5.01	12.70	8.33	24.08	21.12	0.88	3.31	4.11	63.16	4.30	1.25	2.30	9.60	1.68
2	1	19	C/C	G/G	171	81	29.7521	120	70	35.90	116.00	20.90	323.00	64.80	10.50	0.42	12.30	402.00	5.54	15.70	8.34	25.40	22.78	0.90	2.86	3.73	73.03	5.44	1.49	1.92	22.59	0.75
2	1	21	A/C	G/G	153	70	25.7117	132	60	42.20	140.00	31.20	332.00	94.00	12.20	0.25	17.00	206.00	4.49	12.30	8.32	11.86	20.74	1.75	5.39	3.21	59.26	8.35	1.24	1.68	13.32	1.18
2	1	20	A/A	A/A	168	70	25.7117	120	80	47.00	158.00	28.90	336.00	86.10	9.50	0.34	11.00	362.00	5.46	13.20	11.30	32.64	23.83	0.73	3.03	5.60	65.13	5.13	1.22	3.83	12.05	2.00
2	1	19	A/C	A/G	163	73	26.8136	122	80	40.40	135.00	30.50	334.00	91.40	11.00	0.24	13.80	222.00	4.42	13.10	7.00	14.78	17.12	1.16	5.62	3.07	69.91	4.54	1.40	1.45	10.84	0.60
2	1	21	A/C	A/G	168	80	29.3848	120	82	41.90	136.00	29.10	325.00	89.70	10.90	0.23	13.70	213.00	4.67	12.70	10.05	20.74	21.12	1.02	3.17	4.07	63.84	5.19	1.11	2.48	10.53	1.65
2	2	20	A/A	A/A	155	76	27.9155	110	80	36.10	113.00	26.40	313.00	84.30	11.20	0.47	14.50	415.00	4.28	14.20	7.46	19.99	18.90	0.95	4.44	3.68	61.09	5.51	1.55	1.80	4.21	0.60
2	2	23	C/C	G/G	163	70	25.7117	120	70	33.40	100.00	20.40	299.00	68.00	11.20	0.46	14.90	412.00	4.91	18.30	10.75	30.37	23.09	0.76	3.73	3.85	56.26	4.62	0.96	2.61	4.47	0.83
2	2	19	A/C	A/G	175	70	25.7117	120	80	45.80	145.00	27.90	317.00	88.10	9.60	0.37	12.00	384.00	5.20	13.70	9.43	11.60	17.17	1.48	3.69	4.35	67.28	3.83	1.75	2.10	6.50	1.41
2	1	19	A/A	A/A	167	71	26.079	100	60	41.80	137.00	28.70	328.00	87.60	10.80	0.30	13.90	278.00	4.77	13.10	9.05	21.96	22.01	1.00	5.07	3.58	56.03	4.37	1.51	1.77	8.80	0.65
1	2	20	C/C	G/G	182	84	30.854	128	90	50.00	169.00	29.00	338.00	85.90	11.20	0.32	14.40	287.00	5.82	13.40	9.55	23.91	18.60	0.78	5.37	4.45	85.03	4.80	1.27	2.81	15.65	0.73
1	1	19	C/C	G/G	185	84	30.854	136	90	42.00	142.00	29.50	338.00	87.10	10.20	0.29	13.00	289.00	4.82	12.90	7.74	18.95	20.52	1.08	3.46	3.42	78.14	4.33	1.34	1.78	18.81	0.97
2	1	20	A/A	A/A	171	85	31.2213	120	70	42.90	138.00	29.20	322.00	90.70	10.70	0.40	12.70	374.00	4.73	12.00	8.03	11.32	13.98	1.23	2.54	3.36	62.60	4.78	1.38	1.65	13.41	0.95
1	1	19	C/C	G/G	178	88	32.3232	130	90	50.30	168.00	29.50	334.00	88.20	9.80	0.22	12.40	228.00	5.70	12.30	7.82	17.11	12.44	0.73	3.18	4.13	89.65	4.71	1.07	2.66	7.02	0.95
2	3	20	C/C	G/G	165	80	29.3848	130	90	40.50	133.00	29.40	328.00	89.40	10.50	0.36	12.70	338.00	4.53	13.60	7.11	19.85	18.01	0.91	3.81	4.02	60.95	4.26	1.20	2.51	9.69	1.02
2	1	21	A/C	A/G	171	71	26.079	110	70	41.50	133.00	27.40	320.00	85.60	10.20	0.36	12.60	356.00	4.85	12.80	9.90	9.49	14.80	1.56	2.38	3.09	62.54	4.02	1.23	1.63	9.84	0.67
2	2	23	A/C	A/G	163	70	25.7117	120	80	38.60	128.00	29.60	332.00	89.40	11.20	0.38	14.50	341.00	4.32	12.20	8.23	15.95	19.66	1.23	3.07	3.19	65.47	4.74	1.23	1.65	12.58	0.53
2	1	22	A/A	A/A	168	70	25.7117	115	80	43.80	150.00	29.80	342.00	86.90	12.40	0.32	17.60	262.00	5.04	13.00	11.41	83.13	42.99	0.52	3.09	5.73	66.15	4.65	1.09	3.91	6.90	1.89
2	2	22	A/A	A/A	167	72	26.4463	118	72	42.20	138.00	29.20	327.00	89.20	9.20	0.34	10.90	365.00	4.73	12.50	7.09	20.86	19.58	0.94	3.38	4.30	56.68	4.72	1.11	2.57	8.04	1.74
2	2	20	A/C	A/G	166	79	29.0174	105	70	38.80	124.00	28.00	320.00	87.60	11.40	0.37	15.50	320.00	4.43	13.80	9.31	9.84	13.01	1.32	5.11	4.20	68.17	4.37	1.45	2.37	7.13	0.89
2	2	20	A/C	A/G	162	80	29.3848	130	84	41.90	133.00	27.80	317.00	87.70	12.40	0.34	19.10	277.00	4.78	14.40	7.83	36.80	25.09	0.68	4.79	4.58	61.41	5.10	1.11	2.96	4.07	2.17
2	2	21	A/A	A/A	165	71	26.079	102	60	43.60	141.00	25.70	323.00	79.60	10.40	0.33	12.50	318.00	5.48	14.10	11.94	9.97	14.93	1.50	5.82	4.46	62.92	4.55	1.47	2.69	4.86	0.91
2	1	21	A/A	A/A	168	70	25.7117	110	80	44.00	139.00	27.90	316.00	88.20	9.90	0.32	12.40	322.00	4.99	13.90	9.73	23.52	17.72	0.75	5.55	3.90	51.45	4.28	0.80	2.61	11.75	2.10
2	2	24	A/C	A/G	176	82	30.1194	100	60	43.30	140.00	28.70	323.00	88.90	10.90	0.33	13.50	300.00	4.87	13.70	8.41	20.60	16.94	0.82	3.77	4.10	51.52	4.48	1.06	2.73	8.13	0.94
2	1	21	A/C	A/G	167	74	27.1809	110	70	41.70	130.00	26.20	312.00	83.90	12.60	0.29	16.50	228.00	4.97	14.60	6.05	10.19	14.14	1.39	3.71	3.57	61.94	4.60	1.14	2.06	6.76	0.99
2	1	22	A/C	A/G	158	78	28.6501	100	70	40.10	131.00	27.70	327.00	84.80	11.70	0.25	15.60	219.00	4.73	13.60	6.98	26.47	20.85	0.79	3.29	3.93	56.21	4.77	1.06	2.40	8.37	1.39
2	1	20	A/C	A/G	172	85	31.2213	110	70	39.90	124.00	27.40	311.00	88.30	10.40	0.46	12.50	439.00	4.52	13.70	5.14	20.37	20.61	1.01	4.91	4.19	62.36	4.89	1.38	2.43	4.27	0.66
2	1	20	A/A	A/A	170	70	25.7117	110	80	42.80	145.00	29.40	339.00	86.60	10.50	0.35	13.10	333.00	4.94	14.00	11.09	16.82	15.55	0.92	4.48	5.08	72.10	5.16	0.86	3.44	7.63	2.72
2	1	20	A/A	A/A	168	72	26.4463	110	70	39.70	127.00	29.70	320.00	93.00	11.10	0.41	13.90	372.00	4.27	12.90	6.28	11.26	11.93	1.06	4.00	3.72	54.29	4.48	1.44	1.99	15.16	0.74
2	1	20	A/C	A/G	170	70	25.7117	98	60	42.80	141.00	28.80	329.00	87.50	10.10	0.33	12.10	324.00	4.89	13.50	9.87	12.67	15.21	1.20	4.91	4.73	60.57	4.31	1.05	3.15	8.86	1.18
2	2	21	A/C	A/G	165	72	26.4463	110	80	38.80	121.00	27.30	312.00	87.60	11.10	0.33	13.50	302.00	4.43	13.40	6.30	12.54	15.73	1.25	5.17	3.48	51.30	4.38	0.87	2.15	7.04	0.94
2	1	22	A/A	A/A	168	70	25.7117	100	70	39.10	134.00	29.80	343.00	87.10	10.30	0.34	13.00	328.00	4.49	13.00	7.23	11.49	14.34	1.25	3.10	3.47	63.79	4.73	1.25	1.84	12.43	0.60
2	1	22	A/C	A/G	170	72	26.4463	120	80	44.00	146.00	29.20	332.00	88.00	11.50	0.34	15.30	299.00	5.00	13.40	7.10	12.51	17.94	1.43	4.53	5.18	54.75	4.71	1.25	3.41	7.25	1.27
2	2	20	A/C	A/G	160	69	25.3444	120	62	41.50	138.00	29.60	333.00	88.90	11.90	0.32	15.90	269.00	4.67	12.80	10.03	15.57	18.33	1.18	2.79	4.22	60.68	4.73	1.13	2.62	7.96	1.02
2	1	20	A/C	A/G	166	70	25.7117	130	80	41.70	138.00	28.80	331.00	86.90	10.40	0.29	12.60	277.00	4.80	13.70	10.90	11.11	16.20	1.46	2.84	3.70	57.05	4.15	1.29	2.06	19.06	0.97
2	1	23	A/C	A/G	161	69	25.3444	105	60	42.10	136.00	28.90	323.00	89.40	10.20	0.34	12.30	332.00	4.71	12.80	7.75	10.29	14.92	1.45	3.55	3.80	70.13	4.17	1.52	1.93	9.17	0.73
2	2	22	A/A	A/A	172	70	25.7117	110	70	39.50	132.00	30.60	334.00	91.40	11.70	0.25	16.40	217.00	4.32	12.00	4.74	14.57	18.60	1.28	4.41	3.28	54.54	5.28	1.37	1.67	8.95	0.56
2	1	22	A/C	A/G	173	74	27.1809	130	80	39.30	120.00	24.10	305.00	79.10	10.80	0.44	13.10	413.00	4.97	14.70	9.32	30.40	21.59	0.71	4.11	4.41	58.55	4.70	0.99	2.84	11.58	1.95
1	1	21	C/C	G/G	170	83	30.4867	138	90	51.90	169.00	27.10	326.00	83.20	9.50	0.34	11.00	356.00	6.24	14.70	7.79	46.95	27.24	0.58	4.50	4.83	79.24	4.96	1.25	2.99	9.04	1.84
2	1	19	A/C	A/G	162	83	30.4867	120	85	41.90	136.00	29.80	325.00	91.90	11.50	0.37	15.40	324.00	4.56	13.40	8.18	21.79	20.75	0.95	6.72	4.78	74.46	4.59	1.14	3.17	8.16	1.12
2	2	23	A/C	A/G	165	74	27.1809	85	60	41.90	138.00	29.40	329.00	89.30	10.00	0.27	12.70	271.00	4.69	13.00	11.34	41.85	25.89	0.62	3.51	3.78	60.10	4.31	1.06	2.35	15.00	1.34
1	1	23	C/C	G/G	174	74	27.1809	136	98	50.20	170.00	29.30	339.00	86.40	12.10	0.27	17.00	219.00	5.81	13.30	6.94	35.32	21.37	0.61	4.11	3.72	67.22	4.52	1.13	2.29	12.88	1.36
2	2	24	A/C	A/G	163	74	27.1809	130	80	38.20	120.00	28.20	314.00	89.70	9.80	0.35	12.20	355.00	4.26	13.90	7.06	19.20	14.52	0.76	4.00	4.05	53.79	4.37	1.42	2.14	4.43	0.52
2	1	22	A/C	A/G	158	78	28.6501	100	70	40.50	134.00	29.30	331.00	88.60	10.20	0.26	12.70	259.00	4.57	12.40	4.07	23.92	17.90	0.75	4.31	3.98	63.28	4.86	1.16	2.47	11.75	0.65
2	2	22	A/C	A/G	160	69	25.3444	90	60	41.30	136.00	29.20	329.00	88.80	11.80	0.35	15.40	298.00	4.65	13.80	8.11	14.81	14.85	1.00	3.75	4.06	58.01	4.99	1.73	2.12	7.35	0.78
2	2	27	A/C	A/G	161	75	27.5482	122	80	41.80	133.00	26.90	318.00	84.60	11.90	0.37	16.40	310.00	4.94	14.20	5.92	23.96	19.71	0.82	2.91	3.01	58.05	4.88	1.31	1.48	6.67	0.39
2	2	22	A/C	A/G	159	74	27.1809	100	70	43.10	139.00	27.80	323.00	86.20	11.10	0.31	13.80	276.00	5.00	13.40	4.67	17.58	27.12	1.54	3.82	4.75	61.64	3.35	1.78	2.51	10.00	0.58
2	2	23	A/C	A/G	165	73	26.8136	100	70	40.70	140.00	31.90	344.00	92.70	9.60	0.21	11.10	214.00	4.39	12.60	4.53	53.59	22.50	0.42	4.48	4.21	61.32	4.50	1.59	2.15	8.97	0.91
2	2	21	A/A	A/A	176	74	27.1809	122	84	39.80	132.00	29.00	332.00	87.50	12.00	0.21	17.40	174.00	4.55	12.70	6.95	27.36	23.71	0.87	3.64	3.16	56.11	4.24	1.19	1.77	11.09	0.61
2	1	22	A/A	A/A	175	71	26.079	102	60	31.80	93.00	19.90	292.00	67.90	10.80	0.47	12.70	439.00	4.68	16.40	3.81	12.80	18.49	1.44	3.57	2.80	43.50	4.25	0.97	1.57	8.81	0.59
2	1	22	A/A	A/A	165	90	33.0579	110	65	40.90	135.00	29.80	330.00	90.30	11.80	0.33	16.90	279.00	4.53	14.00	8.28	12.87	12.58	0.98	6.22	3.99	49.48	4.25	1.44	2.13	8.75	1.05
2	2	23	A/A	G/G	176	74	27.1809	130	70	37.80	118.00	26.90	312.00	86.30	11.10	0.34	14.00	303.00	4.38	13.80	6.47	11.04	16.36	1.48	4.89	3.58	61.29	4.00	1.25	1.92	11.80	1.03
1	1	23	A/C	G/G	178	75	27.5482	120	80	47.20	164.00	30.30	347.00	87.20	11.60	0.23	15.80	203.00	5.41	12.80	6.41	25.41	18.32	0.72	5.29	3.94	74.34	4.66	1.20	2.37	19.25	0.82
2	2	20	A/A	A/A	165	78	28.6501	140	90	32.90	101.00	23.60	307.00	76.90	10.90	0.22	13.40	276.00	4.28	18.60	5.30	12.84	19.69	1.53	2.63	3.88	48.35	4.64	1.03	2.46	18.49	1.09
1	2	24	A/C	G/G	177	81	29.7521	125	80	46.30	156.00	28.80	337.00	85.40	12.90	0.23	18.80	179.00	5.42	12.50	7.89	50.12	76.05	1.52	5.00	3.29	86.38	4.51	1.20	1.76	21.33	0.63
2	1	23	A/C	A/G	170	90	33.0579	122	70	44.10	145.00	28.80	329.00	87.70	11.30	0.36	14.60	320.00	5.03	13.00	10.26	17.95	15.97	0.89	4.87	4.16	54.93	5.04	1.37	2.36	6.45	1.22
1	2	23	A/C	G/G	178	72	26.4463	110	80	42.90	146.00	28.20	340.00	83.00	11.70	0.29	15.40	246.00	5.17	13.50	5.38	15.18	18.86	1.24	3.62	5.19	73.84	4.79	1.66	2.95	12.44	0.80
2	1	23	A/C	A/G	170	74	27.1809	114	70	41.30	134.00	27.70	324.00	85.30	10.70	0.30	13.40	276.00	4.84	13.40	3.82	15.59	13.31	0.85	3.26	4.39	54.70	5.24	1.68	2.37	17.14	0.62
2	1	20	A/C	A/G	172	85	31.2213	140	60	42.20	138.00	28.10	327.00	85.90	10.10	0.41	12.50	402.00	4.91	12.90	13.32	35.54	27.12	0.76	2.95	4.07	67.06	4.83	0.85	2.62	10.76	2.28
1	1	23	C/C	G/G	175	77	28.2828	130	90	50.50	181.00	30.30	358.00	84.60	10.90	0.20	14.00	184.00	5.97	12.40	7.42	21.17	17.58	0.83	4.28	3.84	80.79	4.91	0.99	2.45	19.00	1.58
2	1	23	A/A	A/A	188	86	31.5886	120	70	44.30	151.00	28.00	341.00	82.00	12.10	0.28	15.80	235.00	5.40	12.80	5.67	23.46	19.47	0.83	3.79	4.49	98.89	4.73	1.40	2.59	11.63	0.82
2	1	23	A/A	A/A	170.5	71	26.079	104	70	40.20	132.00	28.80	328.00	87.60	9.50	0.28	11.40	292.00	4.59	12.90	6.39	9.30	16.44	1.77	3.94	4.56	67.68	5.08	1.01	3.18	10.07	1.14
2	1	23	A/C	A/G	172	70	25.7117	120	84	41.50	138.00	29.70	333.00	89.20	8.60	0.32	10.00	376.00	4.65	12.60	7.47	10.93	14.46	1.32	4.58	4.27	65.39	4.60	1.16	2.71	11.89	1.06
1	1	24	C/C	G/G	186	69	25.3444	130	90	47.40	163.00	30.80	344.00	89.60	10.90	0.20	13.70	182.00	5.29	12.90	6.75	15.41	19.27	1.25	4.09	4.38	83.83	4.88	1.61	2.33	39.82	1.00
2	2	22	A/C	A/G	172	70	25.7117	110	70	39.40	130.00	30.00	330.00	90.80	9.90	0.30	12.20	306.00	4.34	13.50	5.39	10.82	13.59	1.26	3.72	3.64	55.34	4.44	1.17	2.24	7.42	0.43
2	2	23	A/C	A/G	143	76	27.9155	120	80	42.20	135.00	26.90	320.00	84.10	11.40	0.38	14.40	333.00	5.02	13.70	7.69	17.04	14.69	0.86	4.49	3.75	47.68	5.06	1.26	2.22	7.04	0.41
2	2	23	A/C	A/G	170	88	32.3232	130	90	41.60	136.00	27.10	327.00	83.00	11.00	0.40	14.20	365.00	5.01	13.60	8.97	30.67	32.65	1.06	4.69	3.67	56.19	4.00	1.29	2.09	11.54	1.00
2	1	24	A/A	A/A	165	70	25.7117	120	80	43.50	140.00	30.80	322.00	95.60	12.50	0.32	16.90	259.00	4.55	13.30	6.89	17.46	18.88	1.08	3.40	4.18	64.23	4.68	1.25	2.52	17.49	1.02
2	2	23	A/C	A/G	153	72	26.4463	120	70	41.60	136.00	30.40	327.00	93.10	10.90	0.32	13.10	292.00	4.47	13.00	8.35	16.34	19.18	1.17	4.53	5.19	58.43	4.14	1.56	2.96	5.49	2.34
2	1	23	C/C	G/G	168	70	25.7117	130	80	41.70	141.00	29.70	338.00	88.00	10.10	0.32	12.10	315.00	4.74	12.50	4.95	13.10	15.14	1.16	4.41	4.22	64.90	4.87	1.54	2.28	10.14	0.70
2	1	22	C/C	G/G	168	80	29.3848	122	78	39.50	132.00	29.90	334.00	89.60	10.10	0.51	12.10	510.00	4.41	12.50	7.08	12.79	15.50	1.21	4.43	5.80	80.27	4.52	1.47	3.71	13.83	1.71
2	2	21	A/C	A/G	168	77	28.2828	106	70	43.40	139.00	29.20	320.00	91.20	9.80	0.37	12.30	374.00	4.76	12.90	6.46	29.59	17.72	0.60	3.84	5.40	62.27	4.78	1.04	3.91	9.64	0.90
2	1	21	A/C	A/G	178	72	26.4463	120	70	43.60	144.00	32.10	330.00	97.30	11.20	0.30	14.30	270.00	4.48	12.30	6.43	11.77	14.14	1.20	3.60	4.47	71.33	4.93	2.03	2.01	11.81	0.65
2	2	21	A/A	A/A	167	70	25.7117	110	60	40.60	127.00	26.10	313.00	83.40	13.10	0.35	18.20	271.00	4.87	14.20	10.37	16.81	14.29	0.85	5.20	3.76	56.60	5.06	0.95	2.41	6.08	0.57
2	2	20	A/A	A/A	170	71	26.079	118	80	34.70	108.00	26.80	311.00	86.10	10.10	0.42	12.30	421.00	4.03	13.90	6.30	10.49	10.73	1.02	6.01	5.19	59.97	4.51	1.59	3.16	6.26	0.98
2	3	20	A/C	A/G	175	70	25.7117	114	70	44.30	141.00	28.70	318.00	90.20	10.50	0.31	13.10	298.00	4.91	13.10	6.44	9.46	11.14	1.18	2.31	3.85	64.22	4.73	1.08	2.42	9.56	0.65
2	2	20	A/C	A/G	164	70	25.7117	122	80	38.00	121.00	29.40	318.00	92.20	10.30	0.35	12.80	344.00	4.12	12.90	8.62	13.41	15.59	1.16	3.12	2.84	55.30	4.43	1.05	1.57	6.76	0.40
1	1	20	C/C	A/G	177	74	27.1809	118	84	50.40	165.00	30.60	327.00	93.50	12.10	0.23	15.90	186.00	5.39	11.90	6.37	25.13	20.61	0.82	4.89	3.61	94.80	4.04	1.29	1.98	23.03	0.77
2	1	23	A/A	A/A	173	71	26.079	120	84	42.40	138.00	27.70	325.00	85.10	10.80	0.29	13.50	267.00	4.98	13.30	7.36	12.28	12.14	0.99	4.08	4.34	69.67	4.36	1.22	2.73	9.72	1.21
2	2	23	A/A	A/A	160	78	28.6501	120	80	37.80	126.00	29.60	333.00	88.90	12.00	0.30	16.10	248.00	4.25	12.80	5.62	20.36	19.49	0.96	4.62	4.25	61.31	4.28	1.49	2.35	15.89	0.60
1	1	21	C/C	G/G	175	89	32.6905	156	90	45.10	159.00	30.90	353.00	87.60	12.70	0.26	17.30	208.00	5.15	13.00	6.08	36.42	24.76	0.68	3.97	3.57	96.22	4.69	1.03	2.12	10.17	1.37
2	3	21	A/A	A/A	158	69	25.3444	110	80	44.80	149.00	28.40	333.00	85.50	14.10	0.36	22.10	259.00	5.24	12.80	10.47	15.83	14.61	0.92	5.50	4.21	58.97	5.25	1.36	2.48	10.07	0.67
2	1	20	A/C	A/G	164	80	29.3848	120	80	42.70	144.00	28.30	337.00	84.10	10.40	0.35	13.40	340.00	5.08	13.20	8.20	17.32	8.05	0.46	4.96	2.99	62.06	5.11	0.95	1.69	10.69	1.86
1	2	23	C/C	G/G	180	70	25.7117	112	90	43.60	145.00	30.00	333.00	90.10	10.10	0.22	12.80	214.00	4.84	12.10	4.40	11.41	17.04	1.49	6.06	2.62	73.88	4.66	1.18	1.22	14.95	0.51
2	1	21	A/C	A/G	169	75	27.5482	120	80	38.80	129.00	29.70	332.00	89.40	10.90	0.27	13.40	245.00	4.34	12.40	4.58	26.45	20.26	0.77	4.84	4.01	57.26	4.85	1.80	1.98	18.22	0.47
2	2	23	A/C	A/G	160	84	30.854	130	70	39.90	134.00	29.60	336.00	88.30	8.80	0.29	10.20	329.00	4.52	12.70	4.80	13.77	13.74	1.00	4.77	4.93	58.26	5.08	1.21	3.38	8.32	0.71
														蓝色=偏低数值，粉色=偏高数值
														绿色=体重正常组，橙色=肥胖组
